# Supplementary material for: Gene Expression Response to Sea Lice in Atlantic Salmon Skin: RNA Sequencing Comparison Between Resistant and Susceptible Animals
Source: Front Genet. 2018 Aug 3;9:287. doi: 10.3389/fgene.2018.00287 (PMC6086009; doi:10.3389/fgene.2018.00287)
Supplement: Supplementary file 2 [file Data_Sheet_2.XLSX]

## Sheet: DE
Supplementary file 2. Differential expression between healthy and sea lice attachment skin
Gene ID	Chromosome	Start position	End position	Strand	log2FoldChange	lfcSE	padj	gene description
106571918	15	60362186	60391523	+	4.00115	0.250619	7.97e-53	cadherin-13-like
100195957	5	71610064	71619189	+	4.79404	0.307003	1.02e-50	mannose-specific lectin isoform X1
106588483	#N/A	#N/A	#N/A	#N/A	4.33646	0.324455	1.14e-36	#N/A
100196853	9	53197323	53197994	-	3.48792	0.274386	4.53e-33	Fibroblast growth factor-binding protein 1 precursor
106581733	21	11870338	11870882	+	3.76861	0.299765	2.15e-32	uncharacterized protein LOC106581733
106568399	13	95314248	95348985	+	3.30868	0.27074	1.43e-30	integrin alpha-2-like
100196116	15	4348026	4350198	+	3.0842	0.272938	6.68e-26	Epigen precursor
106610433	8	21465352	21488198	-	3.00273	0.26734	1.27e-25	von Willebrand factor A domain-containing protein 7-like
106577138	18	22493595	22495148	-	3.36919	0.301693	2.33e-25	early growth response protein 2b-like isoform X1
106577171	18	26229168	26248956	-	3.65654	0.327902	2.51e-25	myelin and lymphocyte protein-like
106599566	1	28287469	28288617	-	3.10153	0.286688	9.11e-24	protein LBH-like
101448059	12	53815744	53817465	-	3.50626	0.327767	3.11e-23	insulin-like growth factor binding protein 6 paralog A2 precursor
106567641	13	62875187	62882244	-	2.7194	0.257071	1.03e-22	heat shock cognate 70 kDa protein-like
106602268	4	5829731	5845989	-	3.21886	0.313905	2.88e-21	hydroperoxide isomerase ALOXE3-like
106595515	NW_012356040	18	5104	+	2.88404	0.281657	3.13e-21	monocarboxylate transporter 4-like, partial
106564722	12	21941763	21942654	+	2.91299	0.286346	5.83e-21	uncharacterized protein LOC106564722
106588495	#N/A	#N/A	#N/A	#N/A	3.54278	0.349789	8.67e-21	#N/A
106599341	3	24418320	24426335	-	2.99963	0.30039	3.48e-20	carbonic anhydrase-like
106606196	6	543399	549082	+	2.4834	0.254299	2.96e-19	monocarboxylate transporter 4-like
106607322	6	36768215	36769558	-	3.31167	0.349174	4.35e-18	uncharacterized protein LOC106607322
106564757	12	22664026	22670605	+	3.20677	0.339414	5.86e-18	keratin, type I cytoskeletal 19-like
106575381	17	14660237	14665664	+	3.13919	0.333218	7.25e-18	cytokine receptor-like factor 1 isoform X1
106589369	28	6260961	6271562	+	1.83434	0.196097	1.3e-17	centrosomal protein of 55 kDa isoform X2
106598480	NW_012379152	9	581	+	2.17841	0.235732	3.62e-17	desmoplakin-like, partial
106612018	9	74995277	75000549	+	2.75092	0.298149	3.98e-17	caspase-3-like
100286653	22	6070906	6078686	+	3.00037	0.325673	4.35e-17	Cytidine deaminase
106567074	13	35877069	35889108	+	2.24763	0.244099	4.38e-17	LIM domain and actin-binding protein 1-like isoform X2
106600798	3	58437705	58458094	-	2.68802	0.292039	4.38e-17	uncharacterized protein PB18E9.04c-like isoform X4
106582339	21	42660886	42677820	-	3.13218	0.341907	6.32e-17	tumor necrosis factor-inducible gene 6 protein-like isoform X2
106582569	21	56787830	56790794	-	3.00308	0.332121	1.82e-16	collagen alpha-2(VI) chain
100136453	3	31588845	31590067	-	2.79461	0.310987	2.94e-16	cathelicidin isoform X1
106577847	18	57858154	57878184	-	3.06541	0.349178	1.84e-15	cytosolic phospholipase A2 gamma-like isoform X1
106582581	21	57252531	57272660	-	3.06545	0.351907	3.25e-15	collagen alpha-2(VI) chain-like, partial
106611397	9	44035800	44039175	+	2.46988	0.28424	3.82e-15	uncharacterized protein LOC106611397
106572756	15	93301281	93307423	+	2.22528	0.259475	9.99e-15	keratin, type I cytoskeletal 18
106572094	15	72081697	72085158	+	2.69625	0.318039	2.27e-14	tyrosine-protein phosphatase non-receptor type 7-like
100286490	15	4363750	4375692	+	2.48709	0.295623	3.85e-14	Proheparin-binding EGF-like growth factor precursor
106580622	2	24355056	24356240	-	1.56352	0.187746	7.72e-14	uncharacterized protein LOC106580622
100195154	9	37859433	37861871	-	1.12453	0.136659	1.73e-13	Eukaryotic translation initiation factor 2 subunit 1
106612236	9	84480432	84495038	+	2.95953	0.362025	2.64e-13	homeobox protein EMX1-like
106580476	20	30915475	30921671	-	2.53758	0.311901	3.55e-13	dual specificity protein phosphatase 2-like
100195068	14	35545158	35559706	+	2.12213	0.261686	4.31e-13	transglutaminase 1 (K polypeptide epidermal type I, protein-glutamine-gamma-glutamyltransferase) isoform X1
106603791	1	40724735	40733255	-	1.94347	0.243932	1.34e-12	paired box protein Pax-9 isoform X2
106572736	15	92651486	92661830	+	2.17855	0.27558	2.16e-12	carbohydrate sulfotransferase 11-like
106563802	1	118408108	118415147	-	1.92205	0.243933	2.6e-12	leukemia inhibitory factor receptor-like isoform X2
106569443	14	34702470	34721229	+	2.08458	0.264986	2.82e-12	matrix metalloproteinase-14-like
106590561	29	29641386	29651426	+	1.46807	0.187302	3.47e-12	histone-lysine N-methyltransferase EZH2-like isoform X1
106579980	20	18385492	18386634	+	1.99506	0.256916	6.04e-12	tumor necrosis factor ligand superfamily member 6-like
106563956	11	93294897	93307015	-	2.74098	0.354619	7.86e-12	tripartite motif-containing protein 35-like
106605928	5	72967781	72985640	-	2.18909	0.283839	8.8e-12	uncharacterized protein LOC106605928 isoform X1
106581050	20	56732128	56752301	-	1.69887	0.220877	1.02e-11	LIM domain kinase 1-like isoform X5
100196511	24	19074059	19075722	+	1.60763	0.209707	1.22e-11	DNA replication complex GINS protein SLD5
106578097	18	66489468	66491712	-	2.72245	0.358306	2.02e-11	uncharacterized protein LOC106578097 isoform X1
106568475	13	99480076	99591022	-	1.83147	0.24129	2.11e-11	collagen and calcium-binding EGF domain-containing protein 1 isoform X1
100217352	2	40960820	40961598	-	1.69178	0.224342	3.02e-11	14 kDa transmembrane protein
106583970	23	4742948	4750957	+	2.26101	0.300312	3.26e-11	prostaglandin G/H synthase 2-like isoform X1
106570358	14	71830727	71884824	+	1.74332	0.233047	4.63e-11	unconventional myosin-Ig-like isoform X1
106565415	12	52588192	52592270	-	1.32187	0.177421	5.71e-11	protein canopy homolog 2-like
106584053	2	34607932	34641119	+	1.37255	0.18436	5.86e-11	protein MMS22-like isoform X1
106579269	2	16888063	16902420	-	1.73982	0.234634	7.22e-11	nuclear receptor coactivator 7-like isoform X1
100195460	11	17428306	17446002	-	1.7028	0.230075	7.84e-11	pyruvate kinase muscle isozyme isoform X1
106603177	4	35117678	35131400	-	2.48571	0.335925	7.84e-11	thiosulfate sulfurtransferase/rhodanese-like domain-containing protein 1
106612200	9	82850146	82860485	-	1.44069	0.194749	7.84e-11	acidic repeat-containing protein-like isoform X2
106604228	5	8346643	8359052	+	1.2471	0.168999	8.85e-11	heat shock 70 kDa protein 4-like isoform X2
106602869	4	28488366	28502900	-	1.07207	0.145386	9.08e-11	ruvB-like 2
106570668	1	145846020	145847791	+	2.39651	0.325654	1e-10	uncharacterized protein LOC106570668
106602585	4	16019722	16028176	+	1.61594	0.220581	1.26e-10	pre-mRNA-processing factor 19-like
106602347	4	8427072	8427788	-	1.17094	0.160685	1.66e-10	SWI/SNF-related matrix-associated actin-dependent regulator of chromatin subfamily A member 5-like
106595311	NW_012355211	1156	6101	-	2.31855	0.31869	1.79e-10	IgGFc-binding protein-like
106601989	3	88954205	88956320	+	2.21668	0.306243	2.31e-10	monocarboxylate transporter 4-like isoform X2
106606416	6	8279779	8297345	-	1.4952	0.206709	2.36e-10	cyclin-F-like
106564305	12	8352047	8353448	+	1.8627	0.258034	2.57e-10	lipopolysaccharide-induced tumor necrosis factor-alpha factor homolog
106569474	14	35593702	35602160	+	1.29747	0.179749	2.57e-10	zygotic DNA replication licensing factor mcm6-B-like
100380456	3	30660147	30675361	+	1.04866	0.145364	2.62e-10	DNA replication licensing factor MCM4 isoform X1
106560920	10	76047067	76074330	-	2.06748	0.28703	2.8e-10	E3 ubiquitin-protein ligase ZNRF1
106579855	20	23581650	23586168	+	2.10085	0.291828	2.84e-10	early growth response protein 3-like isoform X1
106605202	1	52892487	52893494	+	1.8337	0.254882	2.91e-10	oxoeicosanoid receptor 1
106603693	1	4958970	4986927	-	1.67385	0.232853	2.99e-10	protein-tyrosine kinase 2-beta-like
106570815	15	670038	672197	-	2.45938	0.3432	3.44e-10	interleukin-1 beta-like
100136483	24	25866947	25869409	+	0.866194	0.120877	3.44e-10	tubulin beta-1 chain
100194862	6	62813760	62821749	-	1.32777	0.185923	4.06e-10	Phosphoacetylglucosamine mutase
106588523	27	13958367	13959000	-	2.44344	0.343667	5.05e-10	integumentary mucin C.1-like
106569486	14	36282512	36285527	-	2.54603	0.358243	5.09e-10	carbonic anhydrase 12-like
100194750	3	26091705	26096337	+	1.38155	0.19479	5.59e-10	cell division cycle protein 20 homolog
106601305	3	69009546	69012021	-	1.28934	0.182036	5.92e-10	DNA replication licensing factor mcm5-like, partial
106573007	15	103678248	103678785	-	1.93638	0.274098	6.67e-10	3-beta-hydroxysteroid-Delta(8),Delta(7)-isomerase-like
106583587	22	45234585	45246655	+	1.42312	0.202227	8.03e-10	rac GTPase-activating protein 1-like isoform X1
106574092	16	49661315	49673270	+	1.33384	0.189815	8.54e-10	E3 ubiquitin-protein ligase UHRF1-like
100196719	NW_012347866	19152	22735	+	1.50574	0.21492	9.81e-10	uridine phosphorylase 1
100380622	14	33753293	33760745	-	1.26588	0.180874	1.01e-09	HGV2 protein isoform X1
106585544	2	43701566	43731156	+	1.71285	0.244663	1.01e-09	collagen alpha-6(VI) chain-like
100195433	22	27819573	27827579	-	1.36374	0.194927	1.02e-09	methylosome protein 50 isoform X1
106588492	27	6949183	6959679	-	1.89659	0.271278	1.04e-09	PR domain zinc finger protein 1-like isoform X2
100286678	1	89309118	89335350	+	1.19993	0.171689	1.05e-09	eukaryotic translation initiation factor 4E isoform X1
106587268	26	15199128	15216456	+	1.67294	0.239564	1.08e-09	B-cadherin-like
100195484	4	46247548	46253641	+	1.07823	0.155011	1.3e-09	Ribonucleoside-diphosphate reductase large subunit
100194598	3	50279592	50284410	-	1.06206	0.152826	1.35e-09	protein arginine N-methyltransferase 1 isoform X1
106564958	12	22840353	22843900	+	1.98082	0.285588	1.45e-09	keratin, type I cytoskeletal 13-like
106599711	3	28574396	28581965	+	1.6948	0.244318	1.45e-09	desmoglein-2-like
106607664	6	51006021	51011963	+	1.42198	0.205655	1.67e-09	ribonucleoside-diphosphate reductase subunit M2
106604484	5	19112435	19113376	+	1.45111	0.210542	1.94e-09	heparan sulfate glucosamine 3-O-sulfotransferase 1
106566864	13	25586092	25590904	-	0.958363	0.139101	1.95e-09	dolichyl-diphosphooligosaccharide--protein glycosyltransferase 48 kDa subunit
106604970	1	5196123	5212144	+	1.37705	0.200868	2.46e-09	protein-tyrosine kinase 2-beta-like
100380871	1	149781525	149793594	+	1.42497	0.208048	2.54e-09	Interleukin-31 receptor A precursor
106561075	10	67233709	67234482	+	2.53869	0.371141	2.68e-09	ADM-like
106560287	10	31684803	31694694	+	2.44093	0.35698	2.7e-09	proteoglycan 4-like
106565281	12	38153871	38161818	-	1.74871	0.255819	2.72e-09	protein-glutamine gamma-glutamyltransferase 5-like
106606339	1	55782398	55798648	+	1.24104	0.181826	2.89e-09	lymphocyte-specific helicase-like isoform X1
100196285	4	56283898	56289034	+	1.09035	0.159798	2.91e-09	replication factor C subunit 2
100286454	16	47987484	47989708	+	1.0746	0.157578	2.93e-09	elongation of very long chain fatty acids protein 1 isoform X1
101867534	7	47778137	47778833	+	2.5316	0.371173	2.93e-09	leptin B2 precursor
106587841	26	38540693	38542288	+	1.61509	0.239209	4.61e-09	chondroitin sulfate synthase 1-like
100195587	27	7538921	7543668	-	1.52696	0.226165	4.61e-09	Borealin
106607826	1	66240050	66243403	+	1.36402	0.20212	4.64e-09	cyclin-dependent kinase 1-like
100195151	15	15767141	15789293	+	1.3022	0.192974	4.64e-09	DNA replication licensing factor MCM3
106562284	11	22373024	22378400	-	1.67081	0.2477	4.69e-09	interferon regulatory factor 8-like isoform X3
106603455	4	54886168	54897182	-	1.12796	0.167644	5.23e-09	leucine-rich repeat and WD repeat-containing protein 1
100286418	13	69199914	69202293	+	1.27431	0.18989	5.71e-09	protein MIS12 homolog
106573105	16	6315377	6323733	-	1.42666	0.21259	5.71e-09	aurora kinase B-like
106580001	20	17730982	17733518	-	0.995373	0.148328	5.71e-09	tubulin beta-1 chain
100195812	9	65440582	65443116	+	0.998778	0.14879	5.71e-09	Tubulin beta-2C chain
106603673	4	58980757	59014605	-	1.17357	0.175043	5.9e-09	condensin-2 complex subunit D3 isoform X1
100286508	1	137335400	137337042	-	0.916827	0.136936	6.22e-09	centrin-3
100196609	12	81709320	81715286	+	1.55463	0.232268	6.22e-09	Serine/threonine-protein kinase 6
106589825	28	28252658	28278004	+	1.74227	0.260256	6.22e-09	hexokinase-1-like isoform X2
106560513	10	44321696	44332232	-	1.35379	0.2029	7.13e-09	origin recognition complex subunit 1 isoform X1
106587367	26	23361932	23406921	+	1.76846	0.265232	7.29e-09	uncharacterized protein LOC106587367 isoform X1
106603058	4	35133606	35134759	+	1.46535	0.219885	7.41e-09	cystatin-B-like
106602982	4	33743238	33747193	+	1.48277	0.222593	7.49e-09	equilibrative nucleoside transporter 2-like
106566485	13	8774869	8825877	+	1.39813	0.21091	9.26e-09	inositol 1,4,5-trisphosphate receptor type 3-like
106588760	27	23865762	23873138	+	1.01298	0.153015	9.76e-09	small nuclear ribonucleoprotein Sm D1
100195113	3	51462831	51480914	+	1.2045	0.182067	9.98e-09	EH domain-containing protein 3
106575169	17	8710132	8712691	+	1.63387	0.247043	1e-08	transmembrane protein 198-B-like
100195016	14	11758653	11760051	+	1.5125	0.229703	1.2e-08	guanine nucleotide-binding protein GI/GS/GO subunit gamma-12 isoform X1
106563402	#N/A	#N/A	#N/A	#N/A	2.3673	0.359443	1.2e-08	#N/A
100195156	20	30132322	30145770	+	1.15337	0.175779	1.4e-08	CDC45-related protein
106602346	4	8428876	8435685	-	1.15435	0.176082	1.44e-08	SWI/SNF-related matrix-associated actin-dependent regulator of chromatin subfamily A member 5
100194792	3	67729127	67733612	+	1.30943	0.19993	1.49e-08	DNA replication licensing factor MCM5
106573068	16	3784761	3796213	+	1.42415	0.217636	1.54e-08	vesicle transport protein GOT1B
106578554	2	14483076	14485938	-	1.24386	0.190675	1.75e-08	CD276 antigen-like isoform X3
106570559	14	82757841	82769502	+	1.97647	0.303263	1.81e-08	Y+L amino acid transporter 2-like
106580445	20	30528112	30530416	-	1.05781	0.162521	1.9e-08	proliferating cell nuclear antigen-like
100195128	10	17070698	17093544	+	1.28729	0.198268	2.1e-08	tropomyosin alpha-4 chain isoform X2
106572679	15	90240653	90245901	+	0.817532	0.126166	2.27e-08	proliferation-associated protein 2G4-like
106581923	21	19773104	19787971	-	1.67955	0.259777	2.48e-08	NGFI-A-binding protein 1-like isoform X1
106585589	24	20043750	20048319	-	1.72254	0.266632	2.55e-08	early growth response protein 3-like
106587207	26	18127997	18145450	-	1.77687	0.275307	2.64e-08	semaphorin-7A-like
106577215	18	27322051	27335865	+	1.1674	0.180926	2.65e-08	inorganic pyrophosphatase
106601042	3	61011825	61012468	+	1.4852	0.230375	2.73e-08	cytolysin RTX-A-like
106571473	15	37440809	37456884	+	1.27181	0.197347	2.75e-08	inverted formin-2-like isoform X2
106611645	9	60155130	60174288	-	0.993068	0.154112	2.75e-08	beta-1,4-galactosyltransferase 1-like
106592455	NW_012348242	10623	15503	-	1.41393	0.219566	2.81e-08	serine/threonine-protein kinase PLK1
106587548	26	28235077	28238659	+	0.768084	0.119366	2.84e-08	wee1-like protein kinase 1-A isoform X1
106598937	3	12656772	12658312	+	1.3284	0.206429	2.84e-08	cytochrome b-c1 complex subunit 6, mitochondrial-like isoform X2
100195041	9	18872822	18875795	-	0.799548	0.124247	2.84e-08	Histone-binding protein RBBP4
100195137	1	91970454	92077686	-	1.20316	0.187183	2.94e-08	DNA primase large subunit
106606930	6	25862693	25870766	-	1.77706	0.276449	2.94e-08	protein FAM83F-like
106602366	1	37135483	37146998	-	1.32749	0.206754	3.06e-08	serine/threonine-protein kinase VRK1-like isoform X3
106606807	6	21964510	21967594	+	2.37063	0.369699	3.21e-08	protein phosphatase 1 regulatory subunit 29-like
106567924	13	76376166	76383987	+	2.31144	0.360699	3.25e-08	collagenase 3-like
106578682	19	30534586	30537179	+	1.31594	0.205345	3.25e-08	transcriptional regulator Myc-like
106600827	3	57672712	57676182	+	1.51293	0.236112	3.25e-08	uncharacterized protein LOC106600827 isoform X1
100380588	14	28343558	28352159	-	2.23546	0.348964	3.27e-08	Tubulin beta-2A chain
106613510	10	9981910	9998617	-	1.17747	0.184263	3.56e-08	E3 ubiquitin-protein ligase UHRF1
106581977	21	23413059	23426456	+	2.34416	0.366741	3.56e-08	beta-galactoside alpha-2,6-sialyltransferase 2-like
106587778	26	36568078	36571150	-	2.24075	0.35065	3.56e-08	cell surface glycoprotein 1-like
106610005	1	76644772	76649231	-	1.39077	0.21784	3.65e-08	baculoviral IAP repeat-containing protein 5
106609896	8	729264	739686	+	1.41776	0.222047	3.65e-08	pre-mRNA-processing factor 19
100196021	22	51124521	51127820	-	0.704966	0.110467	3.69e-08	Small nuclear ribonucleoprotein-associated protein B
106607886	6	62077240	62079264	-	1.37784	0.216139	3.84e-08	uncharacterized protein LOC106607886 isoform X1
106573334	16	18123021	18124656	-	1.29841	0.203721	3.85e-08	PCNA-associated factor-like
106577572	18	48496385	48513518	-	1.42275	0.223364	3.92e-08	hepatocyte growth factor activator-like isoform X3
106574504	16	72237956	72243361	+	1.82646	0.286815	3.94e-08	cytokine receptor-like factor 1
106582927	22	17384049	17389491	+	0.880644	0.138319	3.95e-08	dolichyl-diphosphooligosaccharide--protein glycosyltransferase subunit 1-like
106587717	2	46591046	46594990	-	1.42566	0.224121	4.08e-08	cell division control protein 6 homolog
100195017	24	11835314	11840009	+	0.578783	0.0912017	4.47e-08	Ran-specific GTPase-activating protein
106609295	7	39194814	39206580	-	1.32872	0.209481	4.54e-08	condensin-2 complex subunit H2-like isoform X2
106566708	1	129312686	129316325	-	1.40876	0.222158	4.56e-08	G2/mitotic-specific cyclin-B1-like
106594932	2	70172477	70181843	+	1.77495	0.27999	4.59e-08	piggyBac transposable element-derived protein 4-like
100136469	14	70642996	70645166	-	1.66402	0.262638	4.65e-08	anterior gradient-2-like protein 2 precursor
106590563	#N/A	#N/A	#N/A	#N/A	1.02828	0.162288	4.65e-08	#N/A
106581936	21	21867038	21883586	-	1.37589	0.217267	4.72e-08	coagulation factor V-like isoform X2
100286631	NW_012348029	16013	17413	+	1.44864	0.228963	4.87e-08	ubiquitin-conjugating enzyme E2 T
106573940	16	44746304	44758366	-	1.19483	0.18916	5.18e-08	spindle assembly abnormal protein 6 homolog
106563496	11	75426333	75430409	+	1.04134	0.164892	5.19e-08	peptidyl-prolyl cis-trans isomerase FKBP2-like
106586244	2	40792140	40821304	+	1.31046	0.207708	5.37e-08	protein jagged-1b-like isoform X2
106577137	18	22501727	22508017	+	1.41328	0.224155	5.49e-08	kinesin-like protein KIF11-B
106585071	24	13339056	13341270	+	0.851924	0.135523	6.17e-08	proliferating cell nuclear antigen
106577817	18	57401699	57405532	-	1.73233	0.275668	6.22e-08	thioredoxin-like
106576762	18	9910269	9913593	+	1.50859	0.240109	6.23e-08	epithelial cell adhesion molecule isoform X3
106565573	12	56856466	56883716	-	1.20702	0.192446	6.62e-08	Fanconi anemia group D2 protein
100195443	16	44969696	45008297	+	0.839954	0.133906	6.62e-08	zinc transporter 7
100194994	15	25925523	25932341	+	1.23103	0.196501	6.89e-08	Ribonucleoside-diphosphate reductase subunit M2
106583765	22	57671336	57675744	-	2.30469	0.368097	7.02e-08	RING finger protein 208-like
106563120	11	61540084	61540746	-	1.24874	0.199486	7.04e-08	small nuclear ribonucleoprotein Sm D3
106606998	1	58208949	58211387	-	1.8497	0.295682	7.19e-08	cyclic GMP-AMP synthase-like
100196150	10	76076389	76088970	+	1.43951	0.231226	8.68e-08	DNA replication complex GINS protein PSF3 isoform X1
106565722	12	74247018	74256877	-	0.82577	0.1327	8.78e-08	LOW QUALITY PROTEIN: dolichyl-diphosphooligosaccharide--protein glycosyltransferase subunit 2-like
106565361	12	50282360	50290922	+	1.28277	0.20624	8.91e-08	enolase-like
106578385	19	8740353	8746963	+	0.998934	0.161128	1.01e-07	protein disulfide-isomerase A4-like
106590505	29	27263740	27278044	+	1.19552	0.192988	1.03e-07	protein CIP2A isoform X1
100194892	24	10189766	10193529	+	0.914034	0.147658	1.06e-07	Caspase-3
106583719	22	54496032	54511115	-	1.16946	0.189139	1.1e-07	DNA replication licensing factor mcm2
100196393	3	69065127	69066327	+	2.2979	0.371592	1.1e-07	Macrophage inflammatory protein 2-alpha precursor
106563492	1	117354061	117358489	-	1.42769	0.231067	1.12e-07	dual specificity protein phosphatase 4-like
100196854	13	21083523	21101465	-	1.19548	0.193477	1.12e-07	DNA primase small subunit
106609043	7	26301211	26305367	-	1.58288	0.256202	1.12e-07	DEP domain-containing protein 7-like
100380736	3	35545969	35553745	-	0.781701	0.126595	1.13e-07	protein arginine N-methyltransferase 5 isoform X2
106604754	5	34244535	34266901	-	1.30978	0.212182	1.14e-07	centromere protein I-like isoform X2
106584399	23	30665864	30682515	+	1.49148	0.241747	1.16e-07	chromatin assembly factor 1 subunit A-like isoform X1
106578183	1	20225035	20228705	+	1.17896	0.191163	1.17e-07	UDP-glucose 4-epimerase-like
106605090	5	49798024	49811217	-	1.2635	0.20489	1.17e-07	cell division cycle-associated protein 3-like
106606976	6	27900124	27910786	-	1.33811	0.216946	1.17e-07	ras-related protein Rab-37-like isoform X2
106575827	2	8774849	8783207	-	2.18445	0.354359	1.18e-07	interleukin-11 isoform X1
106580490	20	33385159	33395896	+	1.16738	0.189679	1.24e-07	cell division cycle-associated protein 2-like
100196075	29	17764521	17775023	-	1.3625	0.221365	1.24e-07	retinol dehydrogenase 12
106613685	10	16605321	16609148	+	0.882967	0.143502	1.25e-07	calreticulin-like
106564313	12	8412874	8415187	-	1.39743	0.227401	1.3e-07	phosphoglycerate mutase 1
100380449	6	82229129	82235705	+	1.27963	0.208294	1.31e-07	serine/threonine kinase 35
106564912	1	121663236	121672236	-	1.37265	0.223526	1.33e-07	sodium-dependent phosphate transporter 1-B-like
106607725	6	54156844	54182250	-	1.17738	0.192549	1.56e-07	dermatan-sulfate epimerase-like
106586738	2	50810625	50838579	-	2.0168	0.33025	1.63e-07	collagen alpha-1(XVII) chain-like isoform X2
106571199	15	23824793	23829750	-	1.16059	0.190099	1.64e-07	serine/threonine-protein kinase Nek2-like
106603367	4	45193906	45210839	+	1.45903	0.239075	1.66e-07	transmembrane protease serine 13-like
106568799	14	8408784	8411644	+	2.11056	0.346288	1.72e-07	sterile alpha motif domain-containing protein 7-like
106583908	23	2082137	2088974	-	1.01093	0.165838	1.72e-07	fructose-bisphosphate aldolase A-like
106607066	6	29242128	29245193	+	1.37097	0.224876	1.72e-07	importin subunit alpha-1-like isoform X1
106603038	4	34531496	34539059	+	1.34539	0.220862	1.75e-07	kinesin-like protein KIF20A isoform X1
106608279	6	82020089	82023132	+	2.20213	0.361751	1.79e-07	vertnin-like
106561666	10	108123281	108131869	+	1.30002	0.213758	1.83e-07	neuroepithelial cell-transforming gene 1 protein-like
106565867	12	65093763	65112044	-	1.51759	0.249495	1.83e-07	solute carrier family 2, facilitated glucose transporter member 1-like
106584654	23	41669695	41677617	+	2.26027	0.371741	1.84e-07	creatine kinase U-type, mitochondrial isoform X1
106561604	10	105305010	105310448	+	1.28315	0.211277	1.92e-07	aurora kinase B-like
106589464	28	11249936	11251207	-	1.16233	0.191719	2.04e-07	uncharacterized protein C17orf62 homolog isoform X2
106591920	NW_012347400	15096	16786	-	1.48189	0.245043	2.23e-07	3-beta-hydroxysteroid-Delta(8),Delta(7)-isomerase-like
106564725	12	22117936	22125755	+	1.58455	0.262321	2.32e-07	uncharacterized protein LOC106564725
106569971	14	58932068	58934010	-	1.2534	0.20763	2.36e-07	transcription factor 19-like
106572562	15	85922579	85929947	-	0.564387	0.0936988	2.55e-07	45 kDa calcium-binding protein
106601490	3	73272130	73273199	+	2.22445	0.369303	2.55e-07	RING finger protein 208-like
106569884	14	61367479	61373592	-	0.807857	0.134158	2.56e-07	interleukin enhancer-binding factor 2 homolog
100195132	2	42598907	42604841	-	0.884899	0.147129	2.66e-07	importin subunit alpha-2 isoform X1
106587506	26	26545404	26551726	-	0.718707	0.119486	2.66e-07	caprin-1-like isoform X2
106572659	15	89085961	89094722	+	1.54385	0.257006	2.76e-07	beta-1,4 N-acetylgalactosaminyltransferase 1-like
106580467	20	32277944	32281656	-	0.763973	0.127175	2.76e-07	ran-specific GTPase-activating protein-like
106583714	22	53675503	53688938	+	2.23182	0.37205	2.89e-07	protein-glutamine gamma-glutamyltransferase 2-like
106565373	12	51406564	51456223	+	0.75206	0.125588	3.07e-07	citron Rho-interacting kinase-like isoform X2
100196712	22	33497368	33499798	+	1.06747	0.178297	3.07e-07	cyclin-dependent kinase 2
106585394	24	26924939	26941856	-	1.53869	0.256967	3.07e-07	glycine dehydrogenase (decarboxylating), mitochondrial-like
106564753	#N/A	#N/A	#N/A	#N/A	1.46374	0.244623	3.12e-07	#N/A
106583918	23	1779238	1794292	+	1.41082	0.236113	3.28e-07	ras-related protein R-Ras-like
106604666	5	30370306	30395534	+	0.694327	0.116264	3.33e-07	FACT complex subunit SSRP1-like isoform X1
100195237	20	23915769	23934035	-	1.29384	0.216737	3.36e-07	glucosamine--fructose-6-phosphate aminotransferase
106581795	21	15518523	15526628	+	1.59797	0.268158	3.57e-07	polypeptide N-acetylgalactosaminyltransferase 3
106580505	20	34316160	34323018	-	0.764723	0.128373	3.6e-07	nucleolysin TIA-1 isoform p40-like isoform X2
106571177	15	23188141	23194287	+	0.820646	0.137778	3.61e-07	protein disulfide-isomerase A6-like
106585186	24	6754238	6759902	+	0.946712	0.159055	3.68e-07	zinc finger protein 367-like isoform X1
106601909	3	85742356	85747559	+	1.19622	0.201074	3.74e-07	mannose-binding protein C-like
100195130	6	21330026	21344183	+	0.837027	0.140902	3.92e-07	Eukaryotic peptide chain release factor GTP-binding subunit ERF3B
106572059	15	74077885	74083388	+	0.891722	0.15014	3.94e-07	spermidine synthase
106605109	5	50184325	50194755	-	1.12492	0.189423	3.94e-07	replication protein A 32 kDa subunit-like
106607002	6	28997360	29001411	+	1.20969	0.203923	4.08e-07	DNA replication licensing factor mcm5-like
100380399	7	12710609	12717691	+	0.830568	0.140058	4.12e-07	FAM29A
106600382	3	34943516	34945842	+	1.5097	0.254674	4.16e-07	leukotriene B4 receptor 1-like isoform X1
106567171	13	39899765	39904800	-	1.21408	0.205065	4.33e-07	rac GTPase-activating protein 1
106608956	7	23563195	23580654	-	0.79363	0.134187	4.48e-07	sentrin-specific protease 3-like
106570296	14	69004076	69019915	+	1.35883	0.229895	4.56e-07	actin-binding protein anillin-like isoform X2
106563588	11	78331829	78333508	+	1.14376	0.193531	4.57e-07	diamine acetyltransferase 1-like
106604481	5	19204781	19213657	+	1.07275	0.181617	4.64e-07	glutathione reductase, mitochondrial isoform X2
106566468	13	8850983	8853598	+	1.03924	0.176006	4.67e-07	deoxyribonuclease gamma-like isoform X1
106586611	25	31846563	31854037	+	1.21632	0.206006	4.67e-07	LOW QUALITY PROTEIN: centromere protein J-like
106569608	14	41509871	41518596	+	0.766077	0.129857	4.8e-07	calreticulin-like
106586842	25	44802533	44815889	-	1.27021	0.215388	4.84e-07	interferon alpha/beta receptor 1a-like, partial
106577824	18	57406947	57411390	-	1.35614	0.230434	5.19e-07	prostaglandin reductase 1-like
100196484	15	34165306	34168310	+	1.1984	0.203795	5.32e-07	Lymphokine-activated killer T-cell-originated protein kinase homolog
100195905	9	4026708	4030388	-	0.899357	0.153018	5.4e-07	Glucosamine 6-phosphate N-acetyltransferase
106588194	27	1734460	1754987	-	2.18525	0.372029	5.5e-07	brain-specific angiogenesis inhibitor 1-like
100194847	13	103118571	103121295	+	0.596601	0.10161	5.56e-07	CR054 protein
106577685	18	54922169	54923940	-	0.850621	0.145057	5.79e-07	RNA-binding protein 4B-like isoform X2
106589474	28	11385845	11386240	+	0.70011	0.119418	5.82e-07	histone H3.3
106611545	9	53137775	53141819	+	1.21304	0.206983	5.87e-07	cyclin-A2-like
106582367	21	43727852	43736541	+	0.857372	0.146482	6.12e-07	dnaJ homolog subfamily B member 11-like
106576686	18	13152867	13161853	-	1.15457	0.197356	6.16e-07	lymphocyte-specific helicase-like isoform X2
106583701	22	53581400	53591162	+	2.17549	0.371855	6.16e-07	protein-glutamine gamma-glutamyltransferase 2-like
106588616	27	17638183	17641322	-	1.16805	0.199649	6.16e-07	membrane progestin receptor alpha-B-like isoform X1
106566902	13	23083038	23121272	-	0.705462	0.120618	6.19e-07	beta-catenin-like protein 1 isoform X1
106562116	11	17830753	17845813	-	1.68158	0.288213	6.67e-07	semaphorin-7A-like isoform X1
100196188	13	74919661	74933149	-	1.24937	0.214086	6.67e-07	protein BTG3
106585835	24	38516824	38544011	-	1.1126	0.190669	6.67e-07	SWI/SNF-related matrix-associated actin-dependent regulator of chromatin subfamily A containing DEAD/H box 1 isoform X2
106583751	22	56616360	56619612	-	1.03855	0.178054	6.7e-07	mesencephalic astrocyte-derived neurotrophic factor-like
106594008	NW_012351548	4899	12632	-	1.56239	0.267869	6.7e-07	maternal embryonic leucine zipper kinase-like
106569128	14	30234728	30245950	+	0.80328	0.137777	6.77e-07	DNA replication licensing factor mcm4-like
106600378	3	34988253	35004203	-	1.03124	0.176944	6.84e-07	E3 ubiquitin-protein ligase ZNRF1-like
100380635	5	18575867	18594679	+	1.03138	0.177067	6.95e-07	DNA replication licensing factor MCM7 isoform X1
106569079	14	22581882	22587328	+	1.27773	0.219448	7.03e-07	serine/threonine-protein kinase PLK3-like
106610560	8	26061777	26065413	-	1.36592	0.234745	7.16e-07	structural maintenance of chromosomes protein 2-like
100196586	1	14343388	14353106	-	1.34764	0.231729	7.27e-07	14-3-3 protein beta/alpha
106601395	3	70239579	70242373	+	1.25021	0.214994	7.27e-07	importin subunit alpha-1-like
100196320	18	22461848	22467716	-	1.18764	0.204419	7.48e-07	rhotekin-2 isoform X1
100196468	6	4578479	4578967	-	1.34485	0.231503	7.48e-07	Mannose-binding protein C
106583015	22	21123467	21182417	-	1.03725	0.178828	7.86e-07	calcium/calmodulin-dependent protein kinase type 1-like isoform X2
106563136	11	60359762	60405745	-	1.25736	0.217006	8.13e-07	rhotekin-like isoform X2
100195680	1	26865841	26872157	-	1.07957	0.186434	8.27e-07	transforming acidic coiled-coil-containing protein 3 isoform X2
106561922	11	8139763	8148533	+	1.23332	0.213002	8.27e-07	transcription factor E2F8-like isoform X2
100195559	15	74772864	74782867	-	1.1489	0.198632	8.55e-07	6-phosphogluconate dehydrogenase, decarboxylating
100196241	9	99225660	99227368	+	0.747623	0.129328	8.68e-07	U1 small nuclear ribonucleoprotein A
106613907	10	25622501	25628457	-	1.68685	0.29212	8.99e-07	sterol O-acyltransferase 1 isoform X2
106602032	3	90310464	90311583	+	1.472	0.255206	9.32e-07	mannose-binding protein C-like
106576704	18	12666005	12718928	-	0.979613	0.16988	9.36e-07	inactive ubiquitin carboxyl-terminal hydrolase 54-like isoform X1
106603749	#N/A	#N/A	#N/A	#N/A	1.78778	0.310072	9.38e-07	#N/A
101448004	NW_012351927	109	2997	+	0.903586	0.156781	9.48e-07	Histone chaperone asf1-A
100380405	13	79029099	79041427	-	1.15549	0.20056	9.56e-07	Long-chain-fatty-acid--CoA ligase 4
106560558	10	47009736	47014843	-	1.44579	0.251125	9.76e-07	prostaglandin G/H synthase 2-like
106610614	9	4305854	4329814	+	1.70914	0.296948	9.82e-07	ERO1-like protein alpha
100196122	18	22354089	22359248	+	1.06082	0.184435	1e-06	cell division cycle 2 isoform X1
106608948	7	23186489	23204851	-	1.08459	0.188726	1.03e-06	AP-1 complex subunit sigma-1A
106573818	16	40259148	40267862	-	0.763912	0.13297	1.04e-06	calreticulin-like isoform X2
106584295	23	23846244	23858213	+	1.57441	0.274315	1.07e-06	protein-glutamine gamma-glutamyltransferase K
106586634	25	33291469	33300843	+	1.2363	0.215476	1.08e-06	chromatin assembly factor 1 subunit B-like
106570043	14	56157491	56169021	-	1.69682	0.296004	1.11e-06	PR domain zinc finger protein 1-like isoform X1
106574142	16	52504583	52520810	+	0.598341	0.104403	1.11e-06	actin-like protein 6A
106599054	3	14354716	14372614	+	0.518254	0.0904649	1.12e-06	coatomer subunit beta\'-like
106566721	13	21039626	21046914	-	0.758206	0.132432	1.13e-06	prostaglandin E synthase 3-like
106570863	15	3337432	3352850	+	1.39729	0.244029	1.13e-06	DNA-binding protein HU 2-like
106602034	3	90341825	90342995	+	1.12942	0.197257	1.13e-06	mannose-binding protein C-like
106607888	6	62096911	62099466	+	1.26133	0.220305	1.13e-06	DNA repair protein RAD51 homolog 1
106588364	27	10996014	10999281	+	1.48383	0.259319	1.15e-06	tumor necrosis factor receptor superfamily member 11B-like
106560912	10	76267201	76286096	+	1.28048	0.223936	1.17e-06	actin-binding protein anillin-like isoform X5
106582419	21	47399887	47400465	-	1.12014	0.195894	1.17e-06	ADP-ribosylation factor-like protein 4C
106584830	23	48072569	48103514	-	1.30722	0.228593	1.17e-06	protein zwilch homolog
106587264	26	15333789	15339643	+	0.840636	0.147069	1.18e-06	DNA replication factor Cdt1-like
106561617	10	106116637	106126127	-	1.28338	0.22461	1.19e-06	G1/S-specific cyclin-D1-like
106588203	27	2917971	3045374	-	1.27074	0.222605	1.22e-06	oxysterol-binding protein-related protein 10 isoform X3
106584420	23	31632221	31634759	-	0.945026	0.165661	1.25e-06	HAUS augmin-like complex subunit 8 isoform X2
106570867	15	3429343	3431546	+	1.10662	0.194065	1.26e-06	stromal cell-derived factor 2-like
106571580	15	47749389	47749916	+	0.735868	0.129082	1.26e-06	ADP-ribosylation factor 6
106606410	6	7817503	7822208	-	1.02998	0.180631	1.26e-06	RNA-binding protein with serine-rich domain 1-like
106570187	14	64313011	64320000	+	0.704127	0.123646	1.31e-06	splicing factor 3B subunit 4-like
100286415	4	61681751	61684243	-	1.22975	0.215992	1.31e-06	non-specific cytotoxic cell receptor protein-1
106586149	25	10581208	10672564	+	1.92171	0.337617	1.32e-06	acid-sensing ion channel 4-like isoform X2
106570050	14	55086894	55192813	-	1.08014	0.189996	1.36e-06	exostosin-1b-like
106582089	21	29974667	29987115	-	0.949822	0.167082	1.36e-06	centromere protein J
100195528	25	15989963	16001038	-	1.08758	0.19126	1.36e-06	dnaJ homolog subfamily C member 3 isoform X1
100194951	NW_012349646	11821	12052	+	1.53664	0.2703	1.36e-06	Acyl-CoA desaturase
100286534	6	48363824	48371813	-	0.904072	0.159095	1.37e-06	heat shock protein HSP 90-beta isoform X1
100194853	6	50831088	50838485	+	0.659231	0.116004	1.37e-06	cleavage and polyadenylation specificity factor subunit 3
100136398	25	16510481	16540071	-	0.827038	0.145619	1.39e-06	putative ST2L protein isoform X2
106570230	14	64722317	64726096	+	0.961824	0.16953	1.43e-06	nuclear transport factor 2-like
106583643	22	47645055	47658727	-	1.20741	0.212782	1.43e-06	bridging integrator 2-like isoform X1
106590292	29	17877214	17881697	-	1.03922	0.183179	1.43e-06	leukocyte elastase inhibitor-like
100196159	10	92487527	92489118	+	1.27744	0.225358	1.47e-06	PCNA-associated factor
100306857	10	113951682	113967883	+	1.19643	0.211082	1.47e-06	Inner centromere protein B
106570108	14	51996652	52012850	+	0.954999	0.168599	1.49e-06	cyclin-dependent kinases regulatory subunit 1
106601425	3	71117959	71138005	+	0.959503	0.169393	1.49e-06	ras-related protein Rab-37-like isoform X3
106575920	2	8940297	8959159	+	0.756183	0.133526	1.5e-06	condensin complex subunit 1 isoform X1
106585102	24	11048916	11058129	-	1.01309	0.179053	1.54e-06	AP-3 complex subunit mu-2
100195047	9	8925973	8935330	-	0.501193	0.0886328	1.56e-06	CAAX prenyl protease 1 homolog
100380864	9	18893033	18899083	+	0.582954	0.103116	1.57e-06	KH domain-containing, RNA-binding, signal transduction-associated protein 1 isoform X2
106613721	10	17809935	17822407	-	1.25498	0.222081	1.58e-06	minor histocompatibility protein HA-1-like isoform X2
106586236	25	14614813	14617673	+	1.1682	0.20672	1.58e-06	cell division cycle-associated protein 7-like
106565418	1	123953919	123978146	+	0.735606	0.130216	1.6e-06	WD repeat-containing protein 5
106567863	13	78348521	78364750	-	0.968097	0.171419	1.6e-06	ribonucleoside-diphosphate reductase large subunit
100270808	25	27455762	27462543	-	1.77725	0.314673	1.6e-06	interleukin-1 receptor type II precursor
106569045	14	20452174	20463486	+	1.21778	0.21569	1.61e-06	25-hydroxycholesterol 7-alpha-hydroxylase
106599945	3	34946226	34947065	+	1.37006	0.242668	1.61e-06	salivary glue protein Sgs-3-like
106565441	12	53459434	53474959	+	0.804402	0.14256	1.63e-06	protein timeless homolog
100195259	NW_012349649	1	7494	+	0.948804	0.168156	1.63e-06	Polypyrimidine tract-binding protein 1
106603166	4	37913502	37931243	+	1.28687	0.228125	1.64e-06	chromosome-associated kinesin KIF4-like isoform X2
106612933	9	114434058	114500541	+	0.60882	0.10792	1.64e-06	replication protein A 70 kDa DNA-binding subunit-like isoform X2
106563318	11	64281352	64284278	+	1.2263	0.217458	1.65e-06	G2/mitotic-specific cyclin-B1
106565820	12	68799110	68803103	-	0.840785	0.149242	1.7e-06	dolichyl-diphosphooligosaccharide--protein glycosyltransferase subunit 1-like
100194940	6	58790896	58794389	-	1.08231	0.192218	1.72e-06	N-acetyltransferase ESCO1
106572230	15	65259211	65267147	+	1.22828	0.218377	1.78e-06	targeting protein for Xklp2-like isoform X1
106603544	4	48889170	48896024	+	0.729067	0.129647	1.79e-06	dolichyl-diphosphooligosaccharide--protein glycosyltransferase subunit STT3A
106562718	11	40824080	40826346	-	1.33449	0.2374	1.81e-06	prostaglandin E synthase-like
106562523	#N/A	#N/A	#N/A	#N/A	0.986121	0.175586	1.85e-06	#N/A
106604044	4	80919749	80932433	-	1.35657	0.241603	1.86e-06	protein Mis18-alpha-like
106603135	4	37285966	37290593	+	1.61827	0.288397	1.9e-06	delta(14)-sterol reductase
106577311	18	33649721	33654607	-	1.2928	0.230636	1.94e-06	disintegrin and metalloproteinase domain-containing protein 9-like isoform X2
106586818	25	43334333	43377974	+	2.06094	0.367589	1.94e-06	NGFI-A-binding protein 1-like
106605376	5	58423523	58427270	+	1.23861	0.220931	1.94e-06	G1/S-specific cyclin-E2 isoform X4
106607986	6	65240980	65354161	-	0.994268	0.177344	1.94e-06	uronyl 2-sulfotransferase-like
106577590	18	49306236	49307416	+	0.999094	0.178351	1.98e-06	histone H2A.Z
106599389	3	22617928	22637645	-	1.26006	0.225039	2e-06	kinesin-like protein KIF2C
106592913	NW_012349075	10091	15471	-	1.66381	0.297177	2e-06	RNA-binding protein 47-like
100137055	2	29593579	29605096	-	1.61217	0.28805	2.02e-06	granulocyte colony-stimulating factor receptor
106611950	9	70327793	70328900	+	1.33618	0.23874	2.02e-06	gastrotropin-like
106572480	15	82843456	82844340	-	1.52202	0.272048	2.03e-06	CCAAT/enhancer-binding protein beta-like
106567204	13	40530564	40535142	+	0.88138	0.157558	2.04e-06	tubulin alpha-8 chain-like isoform X1
106568012	1	136639447	136641735	+	1.51243	0.270605	2.09e-06	caspase-3-like
106603375	4	45642534	45653036	+	1.14348	0.204737	2.13e-06	DNA excision repair protein ERCC-6-like
106580360	20	26095013	26113966	+	1.18254	0.211897	2.18e-06	kinetochore-associated protein 1
106563505	11	75258724	75261929	+	1.04506	0.187489	2.26e-06	cofilin-2-like
106585939	24	44295392	44302020	+	1.46626	0.263257	2.31e-06	endothelial lipase-like
106587111	2	48103143	48131290	-	0.92218	0.165597	2.32e-06	growth factor receptor-bound protein 2-like
106586502	25	28107744	28116627	+	0.731234	0.131346	2.33e-06	serine/arginine repetitive matrix protein 2-like isoform X3
106609356	7	41259897	41269126	-	1.10707	0.198868	2.33e-06	endoplasmin-like
106580436	20	30201614	30227708	+	1.41243	0.254118	2.45e-06	septin-5-like isoform X2
106573340	16	18170817	18179455	-	0.984429	0.177341	2.54e-06	protein unc-45 homolog A
106576722	18	11944649	11961699	-	1.19877	0.215996	2.55e-06	acetyl-coenzyme A synthetase 2-like, mitochondrial
106612468	9	98090466	98124297	+	1.01241	0.182453	2.56e-06	out at first protein homolog
106610209	8	14162726	14168993	-	1.13066	0.203939	2.62e-06	SWI/SNF-related matrix-associated actin-dependent regulator of chromatin subfamily A member 5-like
106583349	22	34236937	34239605	+	1.00673	0.18166	2.65e-06	protein canopy homolog 2-like
106590645	29	35721597	35748672	-	0.84946	0.153313	2.66e-06	calponin-3-like
106601890	3	85067934	85094332	+	1.41281	0.255061	2.68e-06	adenylate cyclase type 9-like
106588970	27	32308134	32316318	-	1.25619	0.22701	2.76e-06	protein NDRG1-like isoform X2
106583233	22	28169584	28170837	+	1.89823	0.34317	2.79e-06	G-protein coupled receptor 84
106613229	9	131000264	131012639	+	1.25616	0.227154	2.8e-06	nuclear mitotic apparatus protein 1 isoform X5
100194745	8	18278827	18289991	+	1.71547	0.310385	2.85e-06	epidermis-type lipoxygenase 3 isoform X1
106574871	16	79897550	79917991	+	0.824574	0.149273	2.89e-06	periodic tryptophan protein 2 homolog
106605185	5	53120534	53121544	+	1.94458	0.352057	2.89e-06	free fatty acid receptor 2-like
106570037	14	56688439	56710506	+	1.2851	0.23272	2.9e-06	claspin isoform X3
106602360	4	9338089	9347591	+	1.27383	0.231007	3.03e-06	lipopolysaccharide-responsive and beige-like anchor protein
106585927	2	42015372	42028789	-	1.01619	0.18438	3.07e-06	actin-related protein 2-A
106569784	14	47781958	47806872	-	1.93241	0.351035	3.18e-06	LOW QUALITY PROTEIN: epiplakin
106601700	3	78672873	78680706	-	0.797801	0.144975	3.21e-06	eukaryotic peptide chain release factor GTP-binding subunit ERF3A-like
100380276	25	49238735	49241952	-	0.793459	0.144301	3.28e-06	tubulin, alpha 8 like 3-1
100286600	1	47410344	47411899	-	0.811424	0.147598	3.29e-06	Nucleoplasmin-like protein NO29
106565712	12	74638072	74639864	+	0.900886	0.16392	3.31e-06	prothymosin alpha-B-like isoform X2
106589736	28	22560870	22597275	+	0.990206	0.180159	3.31e-06	DNA mismatch repair protein Msh6
106581789	21	15913806	15915041	-	1.32873	0.241843	3.33e-06	kinetochore protein Spc25
100194884	13	40483015	40483890	+	1.35393	0.246641	3.41e-06	CCAAT/enhancer-binding protein beta
106568150	13	90085703	90096415	+	0.774483	0.14115	3.45e-06	protein regulator of cytokinesis 1-like isoform X2
106577482	18	42586233	42796951	-	1.3039	0.237668	3.46e-06	protocadherin-7-like isoform X2
106584054	23	11077802	11091695	-	0.514425	0.0937776	3.46e-06	histone-binding protein N1/N2-like isoform X1
106605457	5	59109926	59112897	+	1.00224	0.182727	3.46e-06	zinc transporter ZIP1-like
106611761	9	63201748	63207030	-	0.901199	0.164313	3.46e-06	cofilin-2-like
100195815	NW_012351828	7955	10599	-	1.0743	0.195881	3.46e-06	Annexin A2-A
100196698	1	82557573	82566433	-	1.23248	0.225387	3.77e-06	p53 apoptosis effector related to PMP-22
106578386	2	14355894	14359126	-	1.96116	0.358663	3.77e-06	IgGFc-binding protein-like
106584651	23	41701278	41708848	+	0.587775	0.107475	3.77e-06	protein disulfide-isomerase A3-like
106604204	5	7558589	7579041	-	1.58925	0.290795	3.82e-06	homeobox protein EMX1-like
106569579	14	40001457	40022817	+	0.822407	0.150498	3.83e-06	DNA ligase 1 isoform X2
106608488	#N/A	#N/A	#N/A	#N/A	1.65295	0.302661	3.89e-06	#N/A
100306858	22	867113	880140	-	0.669601	0.122721	3.99e-06	Endoplasmic reticulum-Golgi intermediate compartment protein 3
106595815	2	72399786	72402194	+	0.979354	0.179541	4.02e-06	actin, cytoplasmic 1-like
106566081	12	81014219	81024988	-	1.09639	0.201114	4.08e-06	uncharacterized protein LOC106566081
106590096	29	9286087	9316772	+	1.14531	0.210107	4.08e-06	condensin-2 complex subunit G2
106576862	18	4293765	4322353	-	1.26486	0.2321	4.11e-06	prominin-1-A-like
106604941	5	40711186	40712115	-	0.657736	0.12077	4.18e-06	heterogeneous nuclear ribonucleoprotein A0-like
106576944	18	14209773	14217224	-	1.49285	0.274186	4.2e-06	exonuclease 1
106610468	1	8116783	8137659	-	0.997561	0.18325	4.22e-06	mis18-binding protein 1
100195123	5	16087920	16093730	-	0.780795	0.143462	4.23e-06	DNA polymerase alpha subunit B
100306772	5	33790777	33793389	+	0.604568	0.111214	4.38e-06	heterogeneous nuclear ribonucleoprotein G isoform X1
100196879	15	2391469	2400994	+	1.22048	0.224561	4.4e-06	dihydrofolate reductase isoform X1
106611589	9	57227918	57229078	-	1.99218	0.366683	4.44e-06	leukocyte cell-derived chemotaxin-2-like isoform X2
106578101	18	66695965	66708975	-	0.989958	0.182264	4.47e-06	rab9 effector protein with kelch motifs-like
106603392	4	46205168	46206268	+	1.39433	0.256785	4.49e-06	lysophosphatidic acid receptor 6-like
106605846	5	70481526	70482312	+	1.87564	0.345724	4.6e-06	interleukin-11-like
106565211	12	42763441	42770832	-	1.2712	0.234376	4.61e-06	rac GTPase-activating protein 1-like
106577739	2	14184525	14189425	+	1.19524	0.220358	4.61e-06	glyceraldehyde-3-phosphate dehydrogenase
106589795	28	28166674	28173290	-	1.32218	0.243776	4.61e-06	interferon regulatory factor 1-like
106599708	3	28540215	28551686	-	1.43469	0.264564	4.62e-06	desmocollin-2-like isoform X1
106592653	NW_012348599	1866	13162	+	1.29134	0.238397	4.77e-06	uncharacterized protein LOC106592653
106565226	12	41284946	41289263	+	1.68281	0.310846	4.85e-06	keratin, type II cytoskeletal 8-like
106569874	14	61620440	61626102	-	1.29724	0.239793	4.94e-06	protein S100-A13-like
106605474	5	58637208	58644366	-	1.1881	0.220065	5.24e-06	solute carrier family 22 member 13-like isoform X1
106579583	19	71396622	71416701	-	0.740384	0.137183	5.28e-06	WD repeat-containing protein 48-like isoform X1
106613808	10	21494412	21506908	-	0.790397	0.146493	5.32e-06	chromatin assembly factor 1 subunit A
106600722	3	50877121	50892228	-	0.626374	0.116126	5.35e-06	serine/threonine-protein phosphatase 4 catalytic subunit B
106607344	6	35786710	35805968	+	1.51825	0.281747	5.5e-06	uncharacterized protein LOC106607344
106610683	9	9187886	9214864	-	1.04061	0.193139	5.51e-06	tonsoku-like protein
106565623	12	60998100	61011029	+	1.0898	0.202295	5.52e-06	ethanolamine kinase 1-like
106567394	13	47007855	47036542	+	0.780331	0.144988	5.64e-06	vitamin K epoxide reductase complex subunit 1-like protein 1
106570548	14	81325815	81327215	+	1.50353	0.279326	5.64e-06	geminin-like
106605348	5	57738283	57748222	+	1.71768	0.319133	5.64e-06	PR domain zinc finger protein 1 isoform X1
106566956	1	128162317	128165011	+	0.77499	0.144069	5.7e-06	exosome complex component RRP4-like
100196613	11	65730883	65733725	+	0.935625	0.173912	5.7e-06	78 kDa glucose-regulated protein precursor
106611655	9	60616076	60625199	-	0.867551	0.161302	5.72e-06	catenin delta-1-like
106589607	28	15782946	15783769	-	0.884938	0.164581	5.76e-06	NHP2-like protein 1
106582108	1	22036551	22038835	-	1.19584	0.222467	5.79e-06	mitotic checkpoint serine/threonine-protein kinase BUB1 beta-like
106608552	7	8092866	8093363	-	1.49558	0.278283	5.82e-06	protein S100-P
106576031	17	34991388	34994256	-	0.804244	0.149666	5.83e-06	ADP-ribosylation factor 4
106589585	28	15614753	15631126	+	1.1378	0.211815	5.88e-06	disks large-associated protein 5
106568941	14	13308434	13316269	-	1.44648	0.269579	6.06e-06	mitochondrial import inner membrane translocase subunit TIM44-like
106588175	27	1144544	1145287	+	1.25128	0.233242	6.08e-06	protein S100-A1-like
106595677	NW_012356636	3951	6272	-	1.30126	0.242901	6.33e-06	kinesin-like protein KIF23
106573207	2	1116491	1125287	-	1.59007	0.296907	6.37e-06	transcription factor E2F3 isoform X1
106579957	20	18887965	18932151	+	1.14046	0.212995	6.4e-06	sarcoplasmic/endoplasmic reticulum calcium ATPase 2 isoform X1
106569076	14	22489764	22490084	+	1.25774	0.235028	6.49e-06	uncharacterized protein LOC106569076
106609581	#N/A	#N/A	#N/A	#N/A	1.14527	0.214088	6.55e-06	#N/A
106562699	11	39880432	39893749	-	1.50922	0.282202	6.59e-06	kinesin-like protein KIF23
106588891	27	29041747	29044315	-	1.33401	0.249489	6.61e-06	ras-related protein Rab-25-like isoform X3
106582148	21	26505063	26518627	-	1.1627	0.217766	6.88e-06	cystathionine beta-synthase-like
106610336	8	18068769	18088520	+	0.859208	0.160932	6.88e-06	bifunctional 3\'-phosphoadenosine 5\'-phosphosulfate synthase 1
106563618	11	78874700	78895216	+	1.14743	0.214962	6.91e-06	M-phase inducer phosphatase 1-B-like isoform X5
106587728	26	34802194	34812737	-	1.70382	0.319316	6.97e-06	kinesin-like protein KIF23, partial
106560278	10	31549834	31555514	+	1.1547	0.216438	6.98e-06	uncharacterized protein LOC106560278 isoform X1
106570689	14	87550337	87552067	+	1.49295	0.279846	6.98e-06	MARCKS-related protein-like
106607864	1	66417735	66436026	+	1.09094	0.204648	7.12e-06	kinesin-like protein KIF11
100380757	7	39555584	39563094	+	1.45803	0.273873	7.39e-06	6-phosphofructo-2-kinase/fructose-2,6-bisphosphatase 3 isoform X2
106612053	9	76158503	76176050	+	1.06887	0.200794	7.4e-06	hyaluronan mediated motility receptor
106612603	9	105798593	105840020	-	0.815755	0.153475	7.71e-06	alpha-actinin-4 isoform X4
106565347	12	49889952	49909978	-	1.16997	0.220163	7.75e-06	ectonucleoside triphosphate diphosphohydrolase 8-like
106602330	4	8158853	8169185	+	1.16932	0.220083	7.76e-06	uncharacterized protein LOC106602330 isoform X2
106610781	9	15420013	15422166	+	1.12342	0.211428	7.76e-06	kelch repeat and BTB domain-containing protein 11-like
100286579	6	63178222	63197513	-	1.00944	0.190052	7.8e-06	histidine triad nucleotide-binding protein 3 isoform X2
106579876	20	22735884	22755008	-	1.11168	0.209481	7.98e-06	centromere-associated protein E isoform X6
106563757	11	83637720	83654244	+	1.11406	0.209983	7.99e-06	glutamine--fructose-6-phosphate aminotransferase
100195353	17	57608565	57609540	-	1.12141	0.211364	7.99e-06	fibroleukin precursor
106610527	8	24775661	24781148	+	1.45595	0.274384	7.99e-06	prostaglandin D2 receptor 2-like
106569070	14	21528125	21544875	-	1.25068	0.235859	8.08e-06	centromere protein L-like
106588592	27	16460136	16478895	-	0.563532	0.106268	8.08e-06	cleavage and polyadenylation specificity factor subunit 1-like
100196244	15	88239175	88252097	-	1.2796	0.241477	8.23e-06	LIM domain and actin-binding protein 1
106586205	25	13782507	13784127	+	1.16536	0.219963	8.26e-06	retinol dehydrogenase 7-like isoform X2
106566507	1	14040150	14123395	-	0.67961	0.128313	8.31e-06	membrane-bound O-acyltransferase domain-containing protein 2-like
106601040	3	61008199	61009755	+	1.25587	0.237145	8.33e-06	cytolysin Src-1-like isoform X2
106604323	5	12543743	12547497	+	0.900193	0.170038	8.39e-06	ribose-phosphate pyrophosphokinase 1-like isoform X4
106590119	29	10944042	10945205	-	1.39632	0.264047	8.63e-06	atypical chemokine receptor 4-like
100380597	NW_012343865	30113	34359	-	0.889066	0.168135	8.63e-06	Tropomodulin-3
106602906	1	45037185	45041156	-	1.45518	0.27525	8.65e-06	fos-related antigen 2-like isoform X2
106602973	1	44863979	44887744	-	1.26325	0.238965	8.65e-06	GTP cyclohydrolase 1-like
106573190	16	13118517	13182276	-	1.50653	0.284962	8.65e-06	cat eye syndrome critical region protein 2-like
106576235	17	43531022	43544024	-	1.63667	0.309695	8.71e-06	ADM2-like
106563322	11	64176988	64193854	+	1.35625	0.256953	8.99e-06	tight junction protein ZO-2-like isoform X3
106570892	15	4141868	4155232	-	1.19312	0.226042	8.99e-06	annexin A3-like
106608776	7	17329336	17332174	-	1.37661	0.26084	9e-06	E3 ubiquitin-protein ligase KEG-like
106563463	11	75927507	75930122	+	1.08923	0.20641	9.01e-06	sororin-B-like
106578831	19	38506806	38521807	+	1.37792	0.261261	9.14e-06	kinesin-like protein KIF20B, partial
106564868	12	25999782	26004083	+	0.689797	0.130889	9.31e-06	importin subunit alpha-1-like
100195405	2	22186540	22189771	-	1.17304	0.222604	9.31e-06	G1/S-specific cyclin-E2 isoform X1
106584298	23	23901254	23903649	+	1.80734	0.342961	9.31e-06	polymeric immunoglobulin receptor-like
100195491	10	26179203	26186616	-	1.13452	0.215342	9.35e-06	K0841 protein
106610172	8	11745551	11778776	-	0.730367	0.138657	9.39e-06	N-acetylgalactosaminyltransferase 7-like isoform X2
106604250	5	9745347	9755219	+	1.10632	0.210119	9.49e-06	uncharacterized protein LOC106604250 isoform X1
106579831	20	24613076	24627698	-	0.649547	0.12348	9.72e-06	drebrin-like protein B isoform X3
106569712	1	143730036	143734387	-	0.920456	0.175007	9.73e-06	prostaglandin E synthase
100196321	17	24589063	24594414	-	0.632466	0.120246	9.73e-06	PCI domain-containing protein 2 isoform X1
106609194	7	36526130	36542631	+	0.931302	0.177181	9.89e-06	B-cell receptor-associated protein 29-like
106580425	20	29983898	30002580	-	1.64253	0.31263	9.97e-06	tissue-type plasminogen activator-like isoform X1
106582878	22	15721810	15731744	+	0.653632	0.124409	9.97e-06	host cell factor 1-like isoform X3
100196619	15	67019039	67026033	-	0.813781	0.155003	1.01e-05	mitogen-activated protein kinase 13 isoform X1
106574730	16	76780715	76784480	-	1.07063	0.203902	1.01e-05	protein downstream neighbor of Son
100196883	25	32898713	32901481	-	0.791564	0.150714	1.01e-05	ribulose-phosphate 3-epimerase
100195495	4	48238534	48244492	-	1.94192	0.369772	1.01e-05	Collagenase 3 precursor
106599924	#N/A	#N/A	#N/A	#N/A	1.89065	0.36012	1.01e-05	#N/A
106573059	16	3492714	3543514	-	1.3818	0.263416	1.03e-05	calcium/calmodulin-dependent protein kinase type 1D-like isoform X1
106577429	18	38365828	38372334	-	0.813592	0.155087	1.03e-05	mitotic checkpoint protein BUB3 isoform X1
106569065	14	21271932	21286088	-	1.22233	0.23313	1.04e-05	laminin subunit gamma-2-like isoform X1
106580605	2	22779747	22791644	-	1.46423	0.279229	1.04e-05	PR domain zinc finger protein 1-like
106561084	10	66208419	66210974	+	0.884287	0.168739	1.05e-05	G/T mismatch-specific thymine DNA glycosylase-like
106562248	11	21474632	21560796	+	0.847023	0.161641	1.05e-05	furin-1-like
106607055	6	29663032	29665687	+	0.986603	0.188357	1.06e-05	DNA replication licensing factor mcm5-like
101448008	6	54462192	54469698	+	0.751351	0.143579	1.09e-05	Histone deacetylase 2
106610569	8	26229057	26236915	-	1.55297	0.296816	1.09e-05	maternal embryonic leucine zipper kinase
106567755	1	134949481	134953248	-	1.19787	0.229346	1.15e-05	stAR-related lipid transfer protein 4
106588823	27	25298152	25304905	-	0.93825	0.179674	1.15e-05	geminin isoform X2
106561476	1	10783950	10785219	-	1.44681	0.277146	1.16e-05	platelet-activating factor receptor-like
106590876	2	58929439	58937599	-	1.23286	0.236287	1.17e-05	protein FAM83F-like
106587206	26	18153586	18176900	+	1.9411	0.372052	1.17e-05	synaptotagmin-4-like isoform X2
100195694	3	40927985	40932954	-	0.692208	0.132669	1.17e-05	LSM7 homolog, U6 small nuclear RNA associated
106580755	20	46179459	46184673	-	1.93209	0.37075	1.21e-05	cytochrome P450 2M1-like isoform X1
106563510	11	75192027	75212453	-	1.14999	0.220821	1.22e-05	chromosome-associated kinesin KIF4-like
106578881	19	41025370	41030520	+	0.833036	0.159966	1.22e-05	uncharacterized protein C17orf62 homolog isoform X2
106603799	4	67517647	67519353	+	0.575599	0.110516	1.22e-05	small nuclear ribonucleoprotein Sm D2-like
106572825	15	95584064	95588483	-	0.7626	0.146526	1.24e-05	GDP-fucose protein O-fucosyltransferase 1
106570078	#N/A	#N/A	#N/A	#N/A	1.51441	0.291001	1.24e-05	#N/A
100195319	10	79348989	79381718	-	0.727669	0.139995	1.28e-05	nuclear pore complex protein Nup93 isoform X2
106609973	8	3922716	3931323	+	0.911094	0.175279	1.28e-05	mannosyl-oligosaccharide glucosidase-like isoform X1
106577530	18	46175441	46176972	+	0.953258	0.183453	1.29e-05	RNA-binding protein 4.1-like isoform X4
106567149	1	127870312	127873092	-	0.953509	0.183541	1.3e-05	78 kDa glucose-regulated protein-like
100306868	29	36484738	36490994	-	0.764118	0.147143	1.31e-05	translocation-associated membrane protein 1-like 1
106601491	3	73244019	73245436	+	1.93085	0.371883	1.31e-05	RING finger protein 186-like
106584139	23	19485468	19505762	+	0.636743	0.122804	1.36e-05	UDP-N-acetylhexosamine pyrophosphorylase-like isoform X2
106565227	12	41291883	41307425	-	1.7001	0.329093	1.5e-05	uncharacterized protein LOC106565227
106583922	23	1661314	1667189	-	0.537858	0.104128	1.5e-05	protein arginine N-methyltransferase 1-like isoform X1
106590995	NW_012343291	62699	68396	+	1.24627	0.241262	1.5e-05	pachytene checkpoint protein 2 homolog
106565560	12	57604279	57607483	+	0.964402	0.187126	1.59e-05	mitochondrial intermembrane space import and assembly protein 40-A-like
106574126	16	53239407	53243984	-	0.512937	0.099596	1.62e-05	profilin-2
106590260	29	20114783	20132603	+	1.29991	0.252447	1.62e-05	phosphoenolpyruvate carboxykinase
106607309	6	37122177	37123218	-	1.24592	0.24202	1.63e-05	fragaceatoxin C-like isoform X2
106570825	#N/A	#N/A	#N/A	#N/A	1.86446	0.362122	1.63e-05	#N/A
106601855	3	83693376	83700470	+	0.689437	0.133982	1.65e-05	RNA-binding protein with serine-rich domain 1-like isoform X2
106582879	#N/A	#N/A	#N/A	#N/A	0.828092	0.161033	1.67e-05	#N/A
106609886	8	501978	539146	+	1.00832	0.196196	1.7e-05	bifunctional UDP-N-acetylglucosamine 2-epimerase/N-acetylmannosamine kinase-like isoform X2
100195170	5	23934218	23937990	+	1.22763	0.239047	1.73e-05	cyclin-A2 isoform X1
100316863	10	65889946	65898140	-	0.964231	0.187892	1.75e-05	protein disulfide-isomerase A3 precursor
106576017	17	34451394	34466520	+	0.784029	0.152746	1.75e-05	ATP-dependent DNA helicase Q1-like isoform X1
106581770	21	16454580	16456545	+	0.718233	0.139948	1.75e-05	cytochrome b reductase 1
106578372	19	8229150	8230418	-	0.82615	0.161001	1.76e-05	neutral cholesterol ester hydrolase 1 isoform X3
106570345	1	146124226	146135601	+	0.982131	0.191517	1.78e-05	uncharacterized protein LOC106570345 isoform X1
106611970	9	71463039	71467532	+	0.740421	0.144399	1.78e-05	nucleotide exchange factor SIL1
106566091	12	80563746	80564925	+	1.01998	0.199052	1.81e-05	major histocompatibility complex class I-related gene protein-like
106568262	13	86947833	86949317	+	1.8907	0.369038	1.82e-05	uncharacterized protein LOC106568262 isoform X2
106589940	28	35034844	35087852	-	1.16579	0.22772	1.85e-05	kinesin-like protein KIF20B isoform X5
106610507	8	24540045	24583024	+	1.40826	0.275045	1.85e-05	prostaglandin D2 receptor 2-like
100380329	22	3691273	3755368	-	0.815564	0.159348	1.86e-05	serine/threonine-protein kinase 4 isoform X1
106595073	NW_012354507	3376	5516	-	0.611851	0.119558	1.86e-05	threonine--tRNA ligase, cytoplasmic-like, partial
100194777	21	28722757	28727508	+	0.576468	0.112788	1.92e-05	lysophosphatidic acid phosphatase type 6 isoform X1
106601796	1	34605760	34624751	+	1.01088	0.197989	1.96e-05	G2/M phase-specific E3 ubiquitin-protein ligase isoform X1
100380418	15	46688229	46695783	-	1.51815	0.297265	1.96e-05	Heat shock protein HSP 90-alpha
106578449	19	10799641	10905315	+	0.804473	0.157565	1.96e-05	DNA polymerase alpha catalytic subunit isoform X1
106583035	22	18407286	18527848	+	0.649315	0.127161	1.96e-05	succinyl-CoA ligase
106600720	3	51404431	51424306	-	1.20479	0.235939	1.96e-05	glycerophosphodiester phosphodiesterase domain-containing protein 3-like
106603348	4	44948534	44951040	+	0.632656	0.123871	1.96e-05	mitochondrial uncoupling protein 2 isoform X1
106613909	1	102053898	102070934	-	1.34723	0.264	1.98e-05	disintegrin and metalloproteinase domain-containing protein 9-like isoform X1
100195324	14	34118829	34135355	-	0.594669	0.11654	1.99e-05	coatomer subunit alpha isoform X1
106580600	20	37716664	37723650	-	1.8891	0.370408	2.01e-05	steroidogenic acute regulatory protein, mitochondrial-like
106568231	13	86308286	86314915	+	1.46667	0.287913	2.07e-05	gamma-glutamyltransferase 5-like
106584598	23	39080608	39084581	+	1.17034	0.229747	2.07e-05	G2 and S phase-expressed protein 1
106577048	18	20636947	20652602	+	1.1207	0.220227	2.12e-05	pleckstrin homology domain-containing family A member 1-like isoform X5
106584976	24	16517905	16533919	+	0.611195	0.120153	2.14e-05	RNA-binding protein EWS-like isoform X4
100196022	6	32136543	32137484	-	-1.13334	0.222861	2.15e-05	P2Y purinoceptor 11
106583284	22	33211748	33227160	+	0.620791	0.12219	2.2e-05	tRNA (guanine-N(7)-)-methyltransferase isoform X1
106574234	2	4956896	4959648	-	0.872057	0.171676	2.21e-05	keratinocyte-associated protein 2-like
106579620	19	74289904	74323117	+	1.81303	0.357137	2.24e-05	myeloid cell surface antigen CD33-like isoform X2
106607311	6	37119476	37120119	-	1.12324	0.221408	2.28e-05	cytolysin RTX-A-like
106609479	7	42821532	42822978	-	1.0429	0.205645	2.3e-05	small nuclear ribonucleoprotein F
106612016	9	74985283	74991999	+	1.1251	0.22198	2.33e-05	centromere protein U-like isoform X2
100136468	27	21509890	21511764	-	1.22674	0.242406	2.42e-05	anterior gradient protein 2 homolog precursor
100136446	2	31018425	31021376	+	1.50603	0.297955	2.49e-05	C type lectin receptor A
106563910	11	91021504	91235513	-	1.10806	0.219333	2.51e-05	hephaestin-like protein 1
106568885	14	15523058	15530361	+	1.0165	0.201205	2.51e-05	acyl-coenzyme A thioesterase 11-like
106583316	2	30794800	30818166	+	1.2748	0.252291	2.51e-05	sodium/potassium-transporting ATPase subunit alpha-3-like isoform X1
106612199	9	82837065	82841601	-	0.990651	0.196037	2.51e-05	sterol-4-alpha-carboxylate 3-dehydrogenase, decarboxylating-like
106589261	28	275374	277298	-	1.18336	0.234383	2.55e-05	sialidase-like
100306832	NW_012347785	1277	3429	+	0.983552	0.194915	2.58e-05	StAR-related lipid transfer protein 5
100286532	20	29199520	29202687	+	1.09513	0.217159	2.62e-05	centromere protein H
106607585	6	47391344	47447910	+	0.774494	0.153633	2.64e-05	ezrin-like
100195467	26	22909666	22912928	+	0.95314	0.189127	2.66e-05	Diphosphomevalonate decarboxylase
106565400	12	52243703	52256553	-	0.58311	0.115736	2.67e-05	ADP-ribosylation factor GTPase-activating protein 1-like isoform X1
106591807	NW_012347253	226	1781	-	1.85943	0.369272	2.71e-05	uncharacterized protein LOC106591807
106608593	7	10081739	10083680	+	0.635499	0.1263	2.75e-05	RNA-binding protein 4.1-like isoform X2
106577994	18	63468062	63470415	+	1.36874	0.272095	2.77e-05	putative ferric-chelate reductase 1
106610806	9	16959831	16962550	+	1.04589	0.208059	2.81e-05	UDP-glucose 4-epimerase-like isoform X3
106598065	3	8078873	8126956	-	0.965482	0.192113	2.82e-05	abl interactor 1-like
106608083	6	71089967	71090494	-	0.670569	0.133407	2.82e-05	ADP-ribosylation factor 6-like
106588468	27	7599323	7617342	+	1.10372	0.219713	2.85e-05	claspin-like isoform X2
100196250	3	86314446	86315856	-	1.33748	0.266367	2.88e-05	Metalloproteinase inhibitor 2 precursor
106560343	10	35924522	35932295	+	1.19834	0.238722	2.89e-05	DNA repair and recombination protein RAD54-like
106588796	27	24207362	24212582	-	0.9428	0.187797	2.89e-05	cell division cycle-associated 7-like protein isoform X1
106611663	9	60768176	60792622	-	0.971203	0.193469	2.89e-05	large neutral amino acids transporter small subunit 3-like
106578996	19	47540119	47548053	+	0.714404	0.142414	2.94e-05	ubiquitin domain-containing protein 1-like
106585119	24	10218872	10226712	+	1.1212	0.223538	2.94e-05	condensin complex subunit 2-like
106573350	16	20481700	20514335	+	1.56257	0.31157	2.95e-05	CD44 antigen-like
106592670	NW_012348625	932	8917	-	1.60103	0.319553	3.02e-05	piggyBac transposable element-derived protein 4-like
106585454	24	24918449	24921405	-	0.506888	0.101224	3.05e-05	protein SET-like
106568006	13	70856326	70910928	-	1.13487	0.22682	3.12e-05	G protein-coupled receptor kinase 6-like
106569985	14	58353360	58363582	-	0.922795	0.184481	3.13e-05	triosephosphate isomerase A
106577653	2	14250094	14287019	-	1.73251	0.34637	3.13e-05	IgGFc-binding protein-like
100196261	1	36315646	36322119	+	0.854849	0.171095	3.22e-05	HAUS augmin-like complex subunit 2
106567693	13	68093719	68105322	+	0.550974	0.110319	3.25e-05	nuclear envelope pore membrane protein POM 121-like isoform X2
106613847	10	22759113	22761601	+	0.678323	0.135857	3.27e-05	MOB kinase activator 3A
106569169	14	28310326	28336446	+	1.37168	0.274744	3.27e-05	cadherin-4-like
106588679	27	20469561	20490446	+	1.14144	0.228753	3.31e-05	actin-binding protein anillin-like isoform X3
106582294	21	39329421	39341187	-	1.2133	0.24337	3.38e-05	BRCA1-associated RING domain protein 1-like
106569698	14	44098446	44099861	-	1.1871	0.238173	3.4e-05	protein FAM111A-like
106581433	20	76540197	76552402	-	1.41862	0.284752	3.43e-05	pentraxin-related protein PTX3-like
106577619	18	50898208	50923030	-	0.705257	0.141592	3.44e-05	protein transport protein Sec24D-like
106562005	11	12209601	12229549	+	1.17784	0.236543	3.46e-05	SHC SH2 domain-binding protein 1
106560302	10	33264933	33266201	+	1.18008	0.237034	3.47e-05	regulator of G-protein signaling 21-like
106579832	20	24596556	24599308	-	1.3661	0.274414	3.47e-05	AT-rich interactive domain-containing protein 5A-like isoform X2
100194821	15	82606804	82609414	+	0.817263	0.164316	3.54e-05	Microtubule-associated protein RP/EB family member 3
106582837	22	12674308	12683341	+	0.601712	0.12099	3.54e-05	dolichyl-diphosphooligosaccharide--protein glycosyltransferase subunit 2-like isoform X1
106595881	NW_012357451	3767	4228	+	0.898794	0.180715	3.54e-05	CD9 antigen-like
106609140	7	33293578	33296570	-	0.644879	0.129717	3.57e-05	ADP-ribosylation factor 4
106601255	3	66110536	66115091	+	1.04592	0.210409	3.58e-05	cytochrome b561-like
100380815	10	87149995	87153966	+	0.620599	0.12493	3.63e-05	Selenide, water dikinase 1
106578696	2	15462595	15466105	+	1.84658	0.37176	3.64e-05	carcinoembryonic antigen-related cell adhesion molecule 20-like
106573056	16	3348428	3349459	+	0.582916	0.117408	3.67e-05	small nuclear ribonucleoprotein F-like
100286640	1	146310083	146313024	+	0.818221	0.164829	3.68e-05	DNA polymerase epsilon subunit 3
106574275	16	64601153	64607098	+	0.89842	0.181022	3.7e-05	centrosomal protein of 70 kDa-like isoform X3
106572650	15	88842302	88856899	+	0.718541	0.144824	3.71e-05	sentrin-specific protease 1-like isoform X1
100286577	18	12130250	12132330	+	1.24959	0.251866	3.71e-05	DNA replication complex GINS protein PSF1
106587338	26	20682837	20685081	-	1.01882	0.205347	3.71e-05	G2/mitotic-specific cyclin-B2 isoform X1
106612014	9	74936887	74949156	-	0.829635	0.167213	3.71e-05	ectonucleotide pyrophosphatase/phosphodiesterase family member 6 isoform X2
106560933	10	75615733	75641661	-	1.14354	0.230528	3.72e-05	large neutral amino acids transporter small subunit 1
106578227	18	70249220	70263556	+	0.980917	0.19779	3.73e-05	calcium uniporter regulatory subunit MCUb, mitochondrial-like
106560616	10	50011154	50049757	+	1.1059	0.223077	3.75e-05	solute carrier organic anion transporter family member 2A1-like isoform X2
106579517	19	67639164	67650849	+	0.614102	0.123888	3.75e-05	spindle and centriole-associated protein 1 isoform X1
106578066	2	12973010	12974940	+	0.975637	0.196794	3.75e-05	protein BTG3-like
106581758	21	16814483	16817374	+	1.06252	0.214317	3.75e-05	cell division cycle-associated protein 7-like isoform X2
106607101	6	31402772	31410392	-	0.865055	0.174506	3.75e-05	activating transcription factor 7-interacting protein 1-like
106566367	13	5347897	5358708	-	0.66378	0.133938	3.76e-05	synaptophysin-like protein 1
106576621	17	55707152	55709296	-	1.10104	0.222367	3.84e-05	transcription factor E2F7-like
106578804	19	36798272	36812659	+	1.06834	0.215829	3.86e-05	kinesin-like protein KIF20B, partial
106583816	22	60657571	60758414	+	1.12192	0.226698	3.88e-05	filamin-B
106561746	10	111709479	111727823	-	1.02102	0.20639	3.91e-05	pleckstrin homology domain-containing family A member 6-like isoform X2
100196889	4	69819834	69856895	-	0.695132	0.140552	3.93e-05	PDZ and LIM domain protein 4
100196214	29	12013788	12017198	+	0.831045	0.168064	3.94e-05	Thymidylate synthase
106585622	24	18397308	18443180	+	0.856425	0.173265	3.98e-05	phosphatidylinositol transfer protein beta isoform-like isoform X1
106575261	17	9761680	9774070	+	0.801261	0.162173	4.01e-05	actin-related protein 3 isoform X1
106562105	11	18135519	18140388	-	0.645521	0.13078	4.1e-05	eukaryotic translation initiation factor 4 gamma 2-like, partial
106564644	12	21180955	21186330	-	0.56728	0.11492	4.1e-05	ATP-dependent RNA helicase DDX39A
106579287	19	51313736	51321127	+	1.41096	0.285863	4.1e-05	disintegrin and metalloproteinase domain-containing protein 8-like isoform X2
106599276	3	25878829	25957673	+	1.34082	0.271692	4.11e-05	potassium voltage-gated channel subfamily H member 6-like isoform X2
106603036	4	34439755	34442221	-	0.870997	0.176506	4.11e-05	ubiquitin-conjugating enzyme E2 D2
100196409	27	627017	631469	+	1.1077	0.224586	4.16e-05	Cyclin-dependent kinases regulatory subunit 1
106607257	6	38848860	38863035	+	0.768919	0.155909	4.16e-05	116 kDa U5 small nuclear ribonucleoprotein component
106586187	25	12869078	12879899	-	0.811062	0.164481	4.17e-05	dipeptidyl peptidase 4-like
106613675	10	16448766	16457422	-	0.539939	0.109526	4.19e-05	myeloid-derived growth factor-like
106594784	NW_012353671	2366	9513	+	0.91797	0.186558	4.38e-05	structural maintenance of chromosomes protein 2-like
106565677	12	59207273	59212612	+	0.688404	0.139934	4.4e-05	methylosome protein 50-like
106564751	12	22542916	22551009	-	1.18192	0.240422	4.47e-05	junction plakoglobin-like
100196691	1	94313532	94317007	-	0.641921	0.130618	4.5e-05	heterogeneous nuclear ribonucleoprotein H3 isoform X1
106568967	14	12298057	12323986	-	-0.55786	0.113535	4.51e-05	lysine-specific demethylase 4A-like isoform X1
106604708	5	32390272	32394659	-	0.681759	0.138836	4.57e-05	cofilin-2-like
106567791	13	80950931	80975165	+	0.758347	0.154554	4.65e-05	moesin isoform X1
106562320	11	24601495	24620969	-	0.851396	0.173661	4.75e-05	sn1-specific diacylglycerol lipase alpha-like isoform X2
106571741	15	48989161	49005604	+	0.665277	0.135846	4.87e-05	tRNA (adenine(58)-N(1))-methyltransferase non-catalytic subunit TRM6
106601640	3	76733796	76739475	+	0.710562	0.145157	4.92e-05	eukaryotic peptide chain release factor GTP-binding subunit ERF3A, partial
106586257	25	15473810	15474892	+	1.16831	0.238743	4.95e-05	G-protein coupled receptor 1-like
106563584	11	78286508	78300006	-	0.884043	0.18071	4.98e-05	ribosomal protein S6 kinase alpha-3-like
106612509	9	99089121	99090248	-	1.57238	0.321515	5.01e-05	transcobalamin-1-like
100196762	22	27652915	27657852	+	0.639943	0.130892	5.04e-05	guanine nucleotide-binding protein G(k) subunit alpha
106561458	1	109962253	109967071	-	1.71151	0.350259	5.1e-05	programmed cell death 1 ligand 2-like isoform X3
106599036	3	13779396	13784284	-	1.21061	0.247811	5.11e-05	mitochondrial import inner membrane translocase subunit TIM44-like
106601413	3	71441670	71445702	+	0.775054	0.158638	5.11e-05	rho GDP-dissociation inhibitor 1-like
106602358	4	9234472	9238721	-	1.26867	0.25969	5.11e-05	SWI/SNF-related matrix-associated actin-dependent regulator of chromatin subfamily A member 5-like, partial
106560596	10	48837492	48856274	-	0.638885	0.130861	5.17e-05	lamin-B2
106566553	13	13539066	13553472	+	0.552327	0.113125	5.17e-05	probable ATP-dependent RNA helicase DHX35
106577938	2	13304639	13311167	+	0.983918	0.201524	5.17e-05	proline and serine-rich protein 3-like isoform X1
106579942	20	19447467	19453875	-	0.993549	0.203528	5.18e-05	cytochrome c oxidase subunit 6A, mitochondrial
106602668	4	19097253	19101762	-	1.79109	0.367027	5.21e-05	mucin-5AC-like
106588321	27	12287544	12293754	-	0.602623	0.123575	5.29e-05	interleukin enhancer-binding factor 2 homolog
106564261	12	7479042	7486696	-	0.952329	0.195327	5.3e-05	histone chaperone asf1b-B-like
106580656	20	42388199	42392089	-	0.688533	0.141323	5.38e-05	stress-associated endoplasmic reticulum protein 1
106611282	9	38621213	38631708	+	1.05756	0.217049	5.38e-05	cysteine-rich protein 1-like
106565980	12	75716758	75723994	+	0.588736	0.120926	5.47e-05	ras association domain-containing protein 1 isoform X1
106571471	15	37365943	37374846	+	0.997923	0.205042	5.51e-05	protein CASC5
106605606	5	67088312	67090183	-	0.955239	0.196357	5.56e-05	maternal B9.15 protein-like
106568720	14	8762377	8785496	-	0.934285	0.192066	5.57e-05	tyrosine-protein kinase JAK1-like
100196419	2	62606035	62609656	+	1.06623	0.219206	5.57e-05	Thymidine kinase, cytosolic
106583830	2	33355752	33363962	+	1.14734	0.23594	5.59e-05	dual specificity protein kinase Ttk-like isoform X1
106604765	5	34500704	34503159	+	0.638824	0.131369	5.59e-05	tubulin beta-4B chain-like
106564857	12	26395159	26405963	+	0.766722	0.157713	5.61e-05	malate dehydrogenase, cytoplasmic-like isoform X1
106565526	12	58629989	58642888	+	0.76301	0.156944	5.61e-05	glycoprotein-N-acetylgalactosamine 3-beta-galactosyltransferase 1-B-like
100380299	NW_012347802	6591	22891	+	0.834476	0.171798	5.72e-05	alpha-actinin-1
106569424	1	142128208	142134137	-	0.720481	0.148398	5.74e-05	ATP synthase subunit alpha, mitochondrial
106573635	16	35024990	35047991	+	1.32785	0.273488	5.74e-05	large neutral amino acids transporter small subunit 1-like
106585713	2	42694140	42766046	-	1.16887	0.240715	5.74e-05	cytoplasmic phosphatidylinositol transfer protein 1-like isoform X1
106607702	6	52670884	52681653	+	0.965143	0.198765	5.74e-05	mitotic checkpoint serine/threonine-protein kinase BUB1-like
100196306	9	17015761	17019854	-	0.634105	0.130593	5.74e-05	peptidyl-prolyl cis-trans isomerase E
106573723	16	31210640	31238814	+	0.638848	0.13164	5.79e-05	nuclear pore complex protein Nup93 isoform X1
106605609	5	66865567	66873784	-	1.15926	0.238933	5.82e-05	TBC1 domain family member 15-like
106569422	14	34247219	34249468	-	1.72091	0.354815	5.86e-05	protein lifeguard 1-like isoform X1
106593831	2	67684090	67722183	-	1.08554	0.224127	6.05e-05	zinc finger protein 420-like
106599588	3	25465301	25466389	+	1.37095	0.283075	6.05e-05	C-C chemokine receptor type 4-like
106611357	9	41632895	41651055	+	1.04708	0.216187	6.05e-05	centromere protein F
106600695	3	50364206	50379938	+	0.818433	0.1691	6.14e-05	ras-related protein R-Ras
106605146	5	52572265	52776178	-	0.881753	0.18234	6.26e-05	mannosyl-oligosaccharide 1,2-alpha-mannosidase IA-like isoform X2
106582690	22	6697007	6711484	-	1.44528	0.298928	6.27e-05	adenosine receptor A1-like
106601492	3	73166888	73182870	+	1.79619	0.371488	6.27e-05	RING finger protein 208-like isoform X1
106565531	12	58391095	58411061	+	0.803804	0.166285	6.28e-05	5\'-AMP-activated protein kinase subunit gamma-1-like isoform X2
106575639	17	20838029	20843861	-	1.74433	0.360869	6.28e-05	keratin, type I cytoskeletal 18-like isoform X1
106601428	3	71051132	71052181	+	0.721418	0.149245	6.28e-05	rho GDP-dissociation inhibitor 1-like, partial
106586717	1	22915299	22923401	+	0.726386	0.150294	6.29e-05	rho GTPase-activating protein 11A-like isoform X2
106583508	22	39921549	39943975	-	1.2013	0.24876	6.41e-05	protein aurora borealis isoform X1
106592919	NW_012349084	9978	10865	+	1.79378	0.371467	6.41e-05	uncharacterized protein LOC106592919
106581777	21	16148651	16165086	+	0.885679	0.183483	6.46e-05	D-3-phosphoglycerate dehydrogenase-like
100380718	19	52454993	52479152	-	0.983026	0.203674	6.47e-05	DNA topoisomerase 2-alpha isoform X2
100380706	12	3417407	3417840	+	0.797366	0.165266	6.52e-05	THUMP domain-containing protein 1
106569982	14	58420255	58442893	-	1.18113	0.244831	6.52e-05	carcinoembryonic antigen-related cell adhesion molecule 6-like
106577562	18	48094188	48099209	+	1.19648	0.247994	6.52e-05	phospholipid scramblase 2-like
100194848	1	113177576	113184690	-	0.651609	0.135125	6.58e-05	disabled homolog 2 isoform X1
106560859	10	79038515	79088109	-	0.523458	0.108587	6.62e-05	splicing factor 3B subunit 3
106575478	17	16718699	16722206	+	0.63151	0.131031	6.64e-05	mitotic checkpoint protein BUB3 isoform X2
106599391	3	22398563	22405398	+	1.10566	0.229411	6.64e-05	serine/threonine-protein kinase PLK3-like
106563465	11	75897457	75908066	-	0.674701	0.140062	6.7e-05	neutral alpha-glucosidase AB isoform X1
106610985	9	24615859	24636751	+	0.952351	0.197684	6.7e-05	kinesin-like protein KIF15
106561171	1	115676376	115677383	+	1.09666	0.227716	6.74e-05	beta-1,3-galactosyltransferase 2-like, partial
106612247	1	94801119	94805240	+	0.696382	0.14462	6.75e-05	leucine-rich repeat-containing protein 59-like
106561556	10	103634839	103649549	-	0.969075	0.201281	6.77e-05	testin-like isoform X2
100380538	4	43777760	43810094	-	0.830085	0.172481	6.82e-05	Moesin
100196383	12	49881458	49889391	+	1.15418	0.239877	6.84e-05	ras-related protein Rab-37 isoform X1
106604584	5	27738246	27741099	+	1.77107	0.368057	6.84e-05	stonustoxin subunit beta-like isoform X3
100286727	1	121766199	121767997	+	1.09606	0.227936	6.92e-05	spindle and kinetochore-associated protein 1
106574724	16	76627343	76644939	-	0.750054	0.155978	6.92e-05	sodium/potassium-transporting ATPase subunit alpha-1
106583294	2	30534294	30555013	+	0.675599	0.140534	6.96e-05	replication protein A 32 kDa subunit
106581080	20	61748568	61749623	+	1.47109	0.30615	7.03e-05	C5a anaphylatoxin chemotactic receptor 1
106564727	12	22138778	22150011	-	1.14112	0.237811	7.26e-05	calpain-9-like isoform X1
100194887	12	45702692	45705921	-	0.975386	0.203544	7.47e-05	Filamin-binding LIM protein 1
106613249	9	132959379	132971042	-	1.35659	0.283121	7.48e-05	pentraxin-related protein PTX3-like
106606739	1	57422284	57429583	-	0.595667	0.124327	7.49e-05	sphingolipid delta(4)-desaturase DES1-like
106575269	17	10022106	10038583	+	0.95082	0.198485	7.5e-05	acyl-CoA-binding protein-like
106583263	2	30429121	30431854	+	0.97562	0.203667	7.5e-05	yrdC domain-containing protein, mitochondrial-like
106611716	9	65170987	65182828	-	1.04469	0.218196	7.58e-05	centromere protein I-like isoform X2
106580335	1	21327105	21329007	+	0.739489	0.154523	7.65e-05	MARCKS-related protein-like
100306862	14	38759539	38771576	-	0.564174	0.117882	7.65e-05	splicing factor 3A subunit 2
106575485	17	17021906	17031287	+	0.814794	0.170402	7.79e-05	polypyrimidine tract-binding protein 1-like isoform X1
106611757	9	63239439	63242419	+	1.48508	0.310621	7.81e-05	fos-related antigen 1 isoform X1
106573682	16	34052245	34055731	-	1.01717	0.212842	7.88e-05	coactosin-like protein
106608122	6	72873635	72877942	-	0.788755	0.165119	7.95e-05	protein FAM49A-like isoform X1
106609935	8	1635254	1652597	-	0.877348	0.183704	7.98e-05	annexin A2-A-like
106610881	1	8463487	8473920	+	1.11209	0.232973	8.06e-05	DNA polymerase epsilon subunit 2
106587651	26	32865537	32876011	+	0.920609	0.192981	8.18e-05	transaldolase-like
106561782	10	112836367	112848796	-	1.00942	0.211626	8.19e-05	protein regulator of cytokinesis 1-like isoform X2
106571209	15	24233635	24289804	-	0.77835	0.163316	8.34e-05	ectonucleotide pyrophosphatase/phosphodiesterase family member 3-like
100196341	20	43284942	43290483	-	0.642877	0.134902	8.35e-05	probable signal peptidase complex subunit 2
106612997	9	116611692	116631418	-	0.77876	0.163471	8.4e-05	vacuole membrane protein 1-like isoform X2
106574503	#N/A	#N/A	#N/A	#N/A	1.67634	0.351966	8.44e-05	#N/A
100196204	15	66070707	66110097	+	0.748991	0.15737	8.57e-05	peptidyl-prolyl cis-trans isomerase H
106601057	3	63905818	63913008	-	0.52255	0.109798	8.57e-05	glucosidase 2 subunit beta-like
106567183	13	40134662	40146127	-	0.549238	0.115417	8.58e-05	CD63 antigen-like
106588565	27	14333573	14334268	-	0.86582	0.18197	8.6e-05	uncharacterized protein LOC106588565
106588093	2	45673995	45687434	+	0.562286	0.118212	8.65e-05	protein disulfide-isomerase
106569170	14	28273600	28287605	-	1.33526	0.280916	8.78e-05	desmocollin-2-like
106570587	14	84054717	84073488	-	1.22283	0.257351	8.84e-05	cell division cycle-associated 7-like protein isoform X2
106588685	27	20640849	20641919	-	0.806784	0.169869	8.93e-05	replication protein A 14 kDa subunit
106563858	11	87432699	87446374	-	0.590175	0.124289	8.96e-05	dolichyl-phosphate beta-glucosyltransferase-like
100380746	3	17255834	17304098	+	0.541227	0.11401	9.01e-05	eukaryotic translation initiation factor 4 gamma 1
106566567	13	13158061	13170868	+	0.93785	0.197583	9.02e-05	sodium- and chloride-dependent creatine transporter 1-like
106576175	17	41390092	41397913	-	0.860319	0.181307	9.07e-05	condensin-2 complex subunit H2-like isoform X1
106571055	15	16497002	16504764	-	1.06545	0.224574	9.09e-05	armadillo repeat-containing protein 1-like isoform X2
106567841	13	79205024	79230502	+	-0.594384	0.125317	9.14e-05	UDP-glucuronosyltransferase-like isoform X2
106585781	24	32851596	32870153	-	1.283	0.270516	9.14e-05	solute carrier family 2, facilitated glucose transporter member 6 isoform X2
106571252	15	25792909	25811216	-	0.823117	0.173604	9.19e-05	14-3-3 protein zeta
106562280	1	114440277	114461751	+	0.691676	0.145904	9.21e-05	protein transport protein Sec31A-like isoform X1
106609135	1	73663877	73674174	-	0.633176	0.133583	9.23e-05	ER lumen protein-retaining receptor 2
106570829	15	1794175	1806648	-	1.42448	0.300562	9.25e-05	3-hydroxy-3-methylglutaryl-Coenzyme A reductase
106612669	9	102771806	102774657	+	1.03654	0.218779	9.3e-05	protein FAM57A-like
106591341	NW_012343773	41817	42779	-	1.08614	0.229258	9.3e-05	serine/threonine-protein kinase PLK1-like
106566950	13	30273698	30283607	-	1.71058	0.361084	9.31e-05	angiopoietin-related protein 7-like
100380548	24	42955285	42961554	+	0.799283	0.168761	9.35e-05	BRI3-binding protein precursor
106572250	15	64625036	64661609	+	1.09922	0.23242	9.64e-05	intermediate filament family orphan 2-like isoform X1
106560925	10	75834285	75862625	+	0.978236	0.206874	9.67e-05	fatty acid 2-hydroxylase
106613747	10	19072321	19077402	+	1.0187	0.215481	9.7e-05	follistatin-related protein 3-like
106588955	27	31395235	31409594	+	0.637902	0.135041	9.87e-05	polypeptide N-acetylgalactosaminyltransferase 12-like isoform X2
106586296	25	19942996	19944776	+	1.6294	0.344988	9.89e-05	uncharacterized protein LOC106586296
100196257	24	40955256	40957794	-	0.75688	0.160348	0.000100153	Stromal cell-derived factor 2-like protein 1 precursor
100195923	3	22394002	22395670	+	0.646905	0.13709	0.000100726	calcyclin-binding protein isoform X1
106589048	27	36913215	36919297	+	0.79895	0.16935	0.000101153	alpha-1,3-mannosyl-glycoprotein 2-beta-N-acetylglucosaminyltransferase-like
106583463	22	41611564	41619553	-	-0.525562	0.111412	0.000101254	NCK-interacting protein with SH3 domain-like isoform X2
100194740	15	33053426	33062459	-	0.591602	0.125451	0.000101876	Nogo-B receptor
106599093	3	14908377	14909697	-	0.848567	0.179969	0.000102127	actin-related protein 2/3 complex subunit 5-like
106568192	13	87520199	87522024	+	0.505142	0.107191	0.00010327	serine/arginine-rich splicing factor 9-like
106610449	8	21374037	21378949	-	1.67988	0.356664	0.000104462	C-type lectin domain family 4 member E-like
100196291	12	29151580	29158204	+	1.28773	0.273546	0.0001056	mal, T-cell differentiation protein
100136449	24	1289672	1291917	+	1.64545	0.349745	0.000106821	interleukin-1 beta isoform X1
106612607	9	105623221	105631671	-	0.552355	0.117453	0.000107711	heterogeneous nuclear ribonucleoprotein L-like isoform X2
100196033	21	1043677	1054662	+	0.563359	0.119835	0.000108437	COMM domain-containing protein 6
106586335	25	20396960	20408034	-	0.925222	0.196828	0.000108437	isocitrate dehydrogenase
100195480	6	9236431	9243955	+	0.813169	0.172989	0.000108437	soluble calcium-activated nucleotidase 1 isoform X2
106585996	24	47746472	47781025	-	0.559939	0.119126	0.00010845	threonine--tRNA ligase, cytoplasmic-like
106586181	2	40983869	40984659	-	1.03868	0.221025	0.00010888	dispanin subfamily A member 2b-like
100136365	1	150754009	150756960	+	1.35779	0.288958	0.000108968	lysozyme C II
106581925	21	19840667	19848599	-	1.59784	0.340075	0.000108968	major facilitator superfamily domain-containing protein 6-like isoform X2
106609179	7	37367751	37371612	-	0.557347	0.118621	0.000108968	ADP-ribosylation factor-like protein 1
106571262	15	26528100	26570615	-	0.539024	0.114746	0.00010935	5\'-3\' exoribonuclease 2-like isoform X2
106572089	15	72170633	72180494	+	0.501878	0.106864	0.00010981	minor histocompatibility antigen H13-like isoform X1
106587962	2	46061484	46062401	+	1.56117	0.332446	0.000109911	transcription factor Sp6-like
100195830	4	2512083	2513284	-	1.43413	0.305495	0.000110612	Ecto-ADP-ribosyltransferase 4 precursor
100196524	10	102553010	102578949	-	0.93875	0.200029	0.000111241	glucose-6-phosphate isomerase
106592820	NW_012348871	435	3419	+	1.39876	0.298106	0.000111604	E-selectin-like
106602245	4	5229983	5265607	+	1.7453	0.372034	0.000111983	C-type lectin domain family 4 member M-like
106575284	#N/A	#N/A	#N/A	#N/A	0.580397	0.123737	0.00011222	#N/A
106568251	13	86158526	86202058	-	1.04909	0.223756	0.000113205	uncharacterized protein LOC106568251
106561706	10	109264822	109271849	+	0.561236	0.11984	0.000116052	endoplasmin-like
106582403	21	46191289	46198088	+	0.871294	0.186137	0.000117225	rho-related GTP-binding protein RhoE-like
106600897	3	54214409	54225998	+	1.5075	0.322078	0.000117312	cytokine receptor common subunit beta-like isoform X2
100194826	19	57909326	57917354	+	0.606992	0.129693	0.00011735	palmitoyltransferase ZDHHC6
106561514	1	110290259	110290597	+	0.834076	0.17831	0.000118684	notch-regulated ankyrin repeat-containing protein A
100195505	13	2195661	2208537	+	0.831428	0.177764	0.000118857	transketolase-like protein 2
106603209	4	38979567	38986902	+	0.978589	0.209321	0.000119933	claudin-7-B-like
100136448	27	9258540	9287400	-	0.749736	0.160463	0.000121393	C type lectin receptor C
106590979	NW_012343276	35408	38967	-	1.11523	0.238707	0.000121469	serine/threonine-protein kinase PLK1-like, partial
106575190	17	8212734	8223341	+	1.17548	0.251687	0.000122263	inhibin beta B chain-like
100380480	15	41152711	41175450	+	1.39588	0.298912	0.00012245	probable G-protein coupled receptor 132 isoform X1
106573078	16	4395019	4422293	+	-0.547699	0.117339	0.000123631	non-muscle caldesmon-like isoform X1
106568974	14	11767526	11768426	-	1.05506	0.226238	0.000126006	growth arrest and DNA damage-inducible protein GADD45 alpha-like isoform X2
106613110	9	122698376	122701474	+	1.55427	0.333475	0.000127519	collagenase 3-like
106563191	11	72425286	72431295	-	0.919027	0.197231	0.000128094	S-adenosylmethionine synthase isoform type-2
106605088	5	49720240	49724067	-	0.969313	0.208056	0.000128416	C-type lectin domain family 4 member E-like
106568488	13	98934254	98937859	+	0.711619	0.152837	0.000129751	cyclin-dependent kinases regulatory subunit 2
100195526	15	37379064	37381362	+	0.947542	0.203497	0.000129751	DNA repair protein RAD51 homolog A
100195225	1	28224883	28229549	-	1.24377	0.267204	0.000130286	tumor necrosis factor alpha-induced protein 2
106590115	2	55927940	55946765	-	1.03243	0.221799	0.000130286	low-density lipoprotein receptor-like isoform X2
100380811	NW_012343443	38240	55724	+	1.59951	0.34377	0.000131344	acidic amino acid decarboxylase GADL1
106587408	26	22223268	22227455	-	0.876887	0.188478	0.00013145	midasin-like isoform X4
106583691	22	52066359	52083223	-	1.27035	0.273222	0.000133189	protein-glutamine gamma-glutamyltransferase 2-like isoform X2
100194613	8	11741204	11742225	+	0.539553	0.116239	0.000137998	high-mobility group box 2
100195558	5	16043283	16044882	-	0.690787	0.148926	0.000139902	Ribonuclease H2 subunit C
106602854	#N/A	#N/A	#N/A	#N/A	-1.30382	0.281079	0.000139902	#N/A
106577207	2	11754109	11759996	+	0.809149	0.174486	0.000140491	lysophospholipid acyltransferase 7 isoform X2
106584632	23	40824226	40833047	+	1.4945	0.322347	0.000141036	nucleobindin-2-like
106566901	13	23178343	23180480	-	0.942666	0.203346	0.000141088	transcription factor E2F1-like
106581869	21	10648175	10649521	+	1.03245	0.222703	0.000141088	gap junction gamma-1 protein-like
106560548	10	46307165	46329722	+	1.08517	0.234149	0.000141773	abnormal spindle-like microcephaly-associated protein homolog
100196344	10	37563281	37776902	+	1.08744	0.234744	0.000143055	GDP-mannose 4,6 dehydratase isoform X1
106587371	26	23287363	23292976	-	1.15969	0.250371	0.000143291	interferon regulatory factor 8-like isoform X2
106607996	1	160437	197188	-	0.974231	0.210483	0.000145294	histone-lysine N-methyltransferase NSD2-like
106586211	25	13956922	13962730	+	1.0848	0.234415	0.000145722	D-3-phosphoglycerate dehydrogenase-like
100195211	4	37368001	37372570	+	0.58222	0.125836	0.00014619	Adenylosuccinate synthetase isozyme 2
106591131	#N/A	#N/A	#N/A	#N/A	0.81473	0.176154	0.000147235	#N/A
106603914	1	45682222	45690191	+	1.44171	0.311744	0.000147395	39S ribosomal protein L33, mitochondrial-like
100380519	14	57633496	57648175	+	0.808999	0.175097	0.000149625	Splicing factor U2AF 65 kDa subunit
106575194	17	8138969	8139677	-	1.63509	0.353881	0.000149625	phospholipase A2 inhibitor 31 kDa subunit-like
100196242	20	14922708	14929960	-	0.85138	0.18423	0.000149625	Annexin A1
100194590	24	2549050	2549514	+	0.546254	0.11821	0.000149625	cold inducible RNA binding protein
106565037	12	32442024	32445194	-	0.77671	0.168186	0.000150921	14-3-3 protein zeta/delta
100380633	17	19041350	19055136	-	0.762934	0.165261	0.000151944	sodium/potassium-transporting ATPase subunit alpha-1
106612496	9	99699204	99725577	+	0.629074	0.136358	0.00015408	cleft lip and palate transmembrane protein 1
106605296	5	56175677	56177187	+	1.09983	0.238427	0.000154135	uncharacterized protein LOC106605296
106608807	7	21053549	21058467	+	0.807968	0.17515	0.000154135	HAUS augmin-like complex subunit 3
106587076	26	8168584	8178641	+	1.06685	0.231301	0.000154327	transcription factor E2F8-like isoform X1
106581779	21	16133610	16139091	+	0.647349	0.140464	0.000156845	peptidyl-prolyl cis-trans isomerase G
106602874	4	28781600	28782028	+	0.75472	0.163764	0.000156845	histone H2AX
106575654	17	21576804	21583954	+	-1.38298	0.300171	0.000157631	early endosome antigen 1-like isoform X1
106564604	12	16496012	16508014	+	0.947953	0.205812	0.000158352	protein transport protein Sec23A-like
106586294	25	19946372	19953836	+	1.58217	0.3435	0.000158352	uncharacterized protein LOC106586294 isoform X1
100196488	12	60294028	60297717	-	0.667179	0.144935	0.000160174	CA050 protein
100195763	13	50181467	50183811	-	0.622213	0.135174	0.000160193	H/ACA ribonucleoprotein complex subunit 2-like protein
106573685	1	17720251	17724150	+	0.587492	0.127661	0.000160865	cytochrome c oxidase subunit 7A2, mitochondrial-like
106610240	8	15664637	15666777	-	0.977193	0.212376	0.000161241	SWI/SNF-related matrix-associated actin-dependent regulator of chromatin subfamily A member 5-like, partial
106566810	13	27158064	27163141	+	0.627458	0.136379	0.000161378	protein RCC2 homolog
100380568	3	57573985	57587238	+	0.550857	0.11974	0.000161501	Ubiquitin-conjugating enzyme E2 Z
106585785	24	32609115	32621301	-	0.906501	0.197166	0.000163517	PHD finger protein 19-like
106610211	8	14210900	14222842	+	1.61053	0.350334	0.000163761	mucin-5AC-like
106612704	9	101808486	101809298	+	1.00536	0.218954	0.000167561	SERTA domain-containing protein 3-like
106574150	16	52371855	52397963	+	1.07303	0.233849	0.000169867	GRAM domain-containing protein 3-like isoform X1
106571470	15	37359610	37362056	-	0.921284	0.200806	0.000170225	uncharacterized protein LOC106571470 isoform X1
106570100	14	52546297	52546945	+	0.944686	0.206037	0.000172369	protein S100-A1-like
106574192	16	54759559	54769442	-	1.2017	0.262102	0.000172369	serine-rich adhesin for platelets-like isoform X2
106572477	15	82784999	82789918	-	0.721209	0.157526	0.000177262	tubulin alpha-8 chain-like
106582799	22	11559903	11567656	-	0.667347	0.145773	0.000177382	ras association domain-containing protein 1-like isoform X1
100195539	15	89927056	89948950	-	0.767117	0.167634	0.00017877	activin receptor type-1B isoform X1
106574435	16	67698077	67826558	+	0.945839	0.206732	0.000179351	nck-associated protein 5-like isoform X1
100196316	2	4944016	4945263	-	0.887961	0.19409	0.000179351	S100-A16
106565657	12	59736162	59737373	+	1.36662	0.298791	0.000180163	cyclin-dependent kinase inhibitor 1-like isoform X2
106592403	NW_012348149	399	2274	-	1.39313	0.304619	0.000180396	intestinal mucin-like protein, partial
106585990	24	47265265	47278798	+	0.668056	0.146179	0.000182814	E3 SUMO-protein ligase PIAS2-like isoform X2
106575188	2	7507966	7516524	-	0.897332	0.196364	0.000182946	tumor necrosis factor receptor superfamily member 1A-like
106568759	14	10511953	10525744	+	0.946458	0.207159	0.000183615	UDP-N-acetylglucosamine transporter-like isoform X1
100195166	2	55471534	55475940	+	0.879549	0.192615	0.000185531	Ras-related protein Rab-3D
106576933	18	13814060	13853138	-	1.51975	0.332868	0.00018599	shootin-1
100306755	2	55904593	55911684	-	1.025	0.224556	0.000186735	AP-1 complex subunit mu-2
106603086	4	35693457	35701119	+	0.731599	0.160354	0.00018845	tyrosine-protein kinase receptor UFO-like
106596099	NW_012358349	780	7094	-	1.14802	0.251636	0.00018845	structural maintenance of chromosomes protein 2-like
106573324	16	17899254	17916695	+	0.908427	0.19913	0.000188463	guanine nucleotide-binding protein G(i) subunit alpha-1-like
106602745	1	4498697	4500212	+	0.751176	0.164687	0.000188927	uncharacterized protein LOC106602745
106592862	NW_012348967	9579	12762	+	1.53888	0.337623	0.000191688	hyaluronan synthase 2-like
106561741	10	111105637	111313782	+	1.13575	0.24924	0.000192516	LOW QUALITY PROTEIN: pleckstrin homology domain-containing family A member 5-like
106569651	14	42509824	42521404	+	1.08542	0.238239	0.000192884	PAS domain-containing serine/threonine-protein kinase isoform X2
106588889	27	28966298	28973687	-	1.00782	0.221199	0.000192884	shugoshin-like 1 isoform X2
106610230	8	14439685	14451234	-	1.53471	0.33689	0.000193122	mucin-5AC-like isoform X2
106579619	19	74360986	74367374	+	1.5953	0.350259	0.000193635	myelin-associated glycoprotein-like isoform X1
106584370	23	29323843	29325378	-	0.572021	0.125593	0.000193635	MOB kinase activator 3A-like
106605852	5	70904274	70906516	-	0.660961	0.14516	0.000194345	cell division control protein 42 homolog
106612633	9	105014514	105015694	-	0.618111	0.135744	0.000194345	transgelin-like isoform X2
106601868	3	84236509	84252184	-	0.990251	0.217556	0.000195652	cyclin-F-like
106583108	22	26435759	26438665	-	1.4818	0.325568	0.000195706	solute carrier family 45 member 3-like
106570124	14	51298045	51299022	-	0.698938	0.153713	0.00019936	basic salivary proline-rich protein 4-like
106576352	17	46472672	46479142	-	0.829385	0.182396	0.00019936	origin recognition complex subunit 5
106583138	22	25128529	25132613	-	0.828518	0.182216	0.00019936	transmembrane protein 183A
106578085	2	12865639	12866736	-	1.00834	0.221812	0.000200055	chemokine-like receptor 1
100195946	13	21948514	21952660	+	0.502108	0.110474	0.000200686	mRNA export factor
106572191	15	67249822	67253131	+	1.02355	0.225211	0.000200686	angiopoietin-related protein 7-like
100195914	13	95561252	95567280	-	0.850461	0.187166	0.000201311	Annexin A3
106587214	26	17734146	17750956	-	0.629307	0.138499	0.000201311	pyruvate kinase PKM-like isoform X2
106578126	18	67578091	67588910	+	-0.677585	0.149137	0.000201448	zinc finger protein 436-like
106588586	27	16199936	16206746	+	0.998845	0.219855	0.000201448	nuclear transport factor 2-like
106595306	NW_012355186	5107	9734	+	1.68966	0.372016	0.000202474	thrombospondin type-1 domain-containing protein 4-like
106572213	15	66014324	66017359	-	1.43297	0.315553	0.000202996	ERBB receptor feedback inhibitor 1-like
106582297	21	39374450	39379643	-	1.28707	0.283509	0.000204083	BRCA1-associated RING domain protein 1-like isoform X2
106572991	15	103013958	103030094	+	0.592936	0.130618	0.000204216	selenide, water dikinase 2-like
106569165	14	28456545	28478729	+	1.14463	0.252239	0.000205532	desmoplakin-like isoform X2
100196133	6	58906864	58914364	+	0.923947	0.20366	0.000206471	costars family protein ABRACL isoform X1
106612271	9	87793047	87803848	-	0.651902	0.143724	0.00020697	phospholipase D3-like isoform X2
106591241	NW_012343597	1001	38503	-	1.59348	0.351314	0.00020697	RAS guanyl-releasing protein 4-like, partial
106586917	25	49260661	49261398	+	0.885247	0.195278	0.000209236	tubulin alpha chain
106571242	15	26280968	26351739	+	0.945808	0.208953	0.000215684	serine/threonine-protein kinase D3-like isoform X1
100195836	16	39580244	39582194	+	0.844081	0.1865	0.000215991	C-C motif chemokine 25 precursor
106602944	1	44890189	44951171	-	1.03927	0.229687	0.000216996	WD repeat and HMG-box DNA-binding protein 1 isoform X1
106583266	22	33908623	33909619	+	0.698609	0.154446	0.000218208	HIG1 domain family member 1A, mitochondrial-like
106579227	19	53252130	53253009	-	0.652275	0.144267	0.000220067	histone H3.3
106567761	13	82712081	82712938	+	1.3803	0.305354	0.000220641	uncharacterized protein LOC106567761
106583862	22	63181708	63183769	+	1.00236	0.221814	0.000221907	MKRN2 opposite strand protein
106562632	1	115099035	115100998	-	0.59927	0.132788	0.00022796	transmembrane emp24 domain-containing protein 2-like isoform X2
106587299	26	13347610	13360020	-	1.09617	0.243088	0.000231676	SHC SH2 domain-binding protein 1-like
100195193	18	6290355	6304276	-	0.818403	0.181624	0.000234875	PDZ and LIM domain protein 1 isoform X1
100194742	14	59444906	59454451	-	0.664364	0.147455	0.000235189	Zinc transporter SLC39A7 precursor
106565159	1	122188804	122200754	+	0.639879	0.142039	0.000235588	GPI ethanolamine phosphate transferase 3
106570373	14	72617594	72620907	-	0.834179	0.185207	0.000236174	ras-related GTP-binding protein C isoform X2
106570086	14	52958682	52990591	+	0.652659	0.144906	0.000236174	ceramide synthase 2-like
106572584	15	88320820	88324005	+	1.16235	0.258129	0.000237063	transcription factor NF-E2 45 kDa subunit-like
106593515	1	25247897	25266182	-	1.61125	0.357917	0.000238237	placenta growth factor-like isoform X2
106570064	14	54509757	54517063	-	0.816546	0.181395	0.000238282	chloride intracellular channel protein 1-like
106602211	4	3341715	3346864	+	0.960483	0.213511	0.000241388	docking protein 1-like
100286465	NW_012354029	2433	4135	-	-1.0028	0.222961	0.000242141	protein Flattop
106600816	3	57975347	57977735	+	1.30478	0.29012	0.000242211	keratin, type I cytoskeletal 13-like
106560503	10	43468881	43551857	-	0.820779	0.182515	0.000242337	cyclic AMP-dependent transcription factor ATF-6 alpha isoform X2
106612221	1	94816604	94827668	-	1.08638	0.241662	0.00024394	crossover junction endonuclease EME1 isoform X1
106583477	22	41290130	41309676	-	1.31584	0.292751	0.000244507	laminin subunit beta-3
106588333	27	11968084	11976192	+	0.96028	0.213851	0.000249034	uncharacterized protein LOC106588333 isoform X1
106583655	#N/A	#N/A	#N/A	#N/A	0.925857	0.206185	0.000249034	#N/A
106578043	18	64674471	64699962	+	0.785883	0.175057	0.000250083	H(+)/Cl(-) exchange transporter 5-like isoform X2
106605153	#N/A	#N/A	#N/A	#N/A	0.684271	0.15244	0.000250437	#N/A
106577008	18	18325249	18345622	+	1.06501	0.237358	0.000252408	bifunctional 3\'-phosphoadenosine 5\'-phosphosulfate synthase 2-like
106599333	3	24777525	24786536	-	0.760507	0.169574	0.000254686	protein canopy-1-like
106606075	5	76574131	76576446	+	1.5151	0.337954	0.000256404	uncharacterized protein LOC106606075 isoform X2
106571208	15	24155459	24211331	+	0.792827	0.17687	0.000256902	ezrin
106589841	28	28830819	28835435	+	0.594442	0.132779	0.000263487	ADP-ribosylation factor-like protein 3
106607865	6	61079985	61088297	+	0.715755	0.159949	0.000265748	lamin-B receptor-like
100286553	9	9368063	9374126	+	0.609424	0.136246	0.00026787	heterogeneous nuclear ribonucleoprotein Q isoform X3
100380341	12	85196344	85207046	-	0.964789	0.21575	0.000268305	DNA replication licensing factor MCM2
106564849	12	26569827	26591824	+	0.748231	0.167309	0.000268305	actin-related protein 2-A
106580524	20	35445849	35463938	-	1.1523	0.257706	0.000268305	tumor necrosis factor receptor superfamily member 10A-like isoform X1
106587342	26	20787649	20891700	+	0.867149	0.193926	0.000268305	disintegrin and metalloproteinase domain-containing protein 10-like
106600384	3	34909768	34910649	+	0.818438	0.183016	0.000268305	myeloid-associated differentiation marker homolog
106610390	8	20400394	20409751	+	0.62102	0.138883	0.000268305	zinc finger protein 287-like isoform X1
106609352	7	41128211	41163061	+	0.764041	0.170936	0.0002701	neuroepithelial cell-transforming gene 1 protein-like isoform X1
106584655	23	41641445	41661854	+	0.948093	0.212225	0.000272839	treslin isoform X4
100194934	21	42117424	42167951	+	0.616859	0.138088	0.000272865	protein disulfide-isomerase A5 isoform X1
106590167	29	13155543	13166597	-	0.819693	0.183539	0.000274014	protein FAM49B
106563520	11	74773388	74800472	+	1.07664	0.241097	0.000274342	kinesin-like protein KIF18A isoform X2
106599184	3	11858759	11878450	+	1.59129	0.356814	0.000281686	CMRF35-like molecule 5
106575217	17	7067820	7071251	+	0.902442	0.202379	0.000281913	NGFI-A-binding protein 1-like
101448029	20	70748150	70749067	-	1.25885	0.282316	0.000281913	forkhead box protein L2
106599520	3	18926805	18937164	+	1.05413	0.236409	0.000281913	long-chain-fatty-acid--CoA ligase 3-like
106591804	NW_012347248	8941	19688	-	1.50744	0.338106	0.000282209	cis-aconitate decarboxylase-like
106580118	20	12928859	12934486	+	0.862603	0.193492	0.000282487	serine/threonine-protein kinase Chk2-like isoform X1
106581321	20	69054077	69288140	+	0.675659	0.151645	0.000285341	proton-coupled amino acid transporter 4-like isoform X1
106580659	2	24282736	24292672	-	0.883099	0.198232	0.000285914	ras-related protein Rab-11A-like
106583179	22	30845709	30858007	+	1.65643	0.371925	0.00028726	prostacyclin synthase-like
100196322	13	97006572	97009646	+	1.17633	0.264524	0.000296056	programmed cell death 1 ligand 1 isoform X1
106605147	5	52796289	52841094	-	1.43925	0.323666	0.000296157	sodium/hydrogen exchanger 1-like isoform X1
106586830	25	41744997	41748344	+	0.942652	0.212034	0.000297184	poly
106564930	12	23355732	23358182	-	0.575957	0.12958	0.00029823	THO complex subunit 4-A-like
100136439	14	31118630	31119882	-	1.61687	0.363821	0.000298881	cathelicidin antimicrobial peptide isoform X2
106562383	1	114604368	114645088	+	0.505483	0.113754	0.000299271	zinc finger SWIM domain-containing protein 6-like isoform X2
106577253	18	29979347	29981921	+	-0.534434	0.120296	0.000300071	methylcytosine dioxygenase TET3-like
106605365	5	58167269	58178531	-	1.25608	0.28273	0.000300071	uncharacterized protein LOC106605365
106602689	4	19595875	19597819	-	0.609243	0.137316	0.000308072	transmembrane protein 134-like isoform X2
100286487	NW_012349174	9480	16553	+	1.00379	0.226467	0.000313516	Transaldolase
106585579	#N/A	#N/A	#N/A	#N/A	1.47287	0.332407	0.000315374	#N/A
106572830	1	158539447	158540508	+	1.6277	0.367538	0.000318418	transcription factor AP-1-like
106610672	9	8511807	8512925	-	1.27876	0.288821	0.000319773	platelet-activating factor receptor-like
106580313	20	27743631	27773529	-	0.989811	0.223761	0.000325173	coronin-1C
100195003	19	14311576	14329149	+	0.655511	0.14821	0.000325583	polypyrimidine tract-binding protein 2
106609239	7	34538177	34544853	-	1.02099	0.230836	0.000325583	aldose reductase-like
106602592	1	39305692	39318561	-	0.502411	0.113733	0.000333489	ras and Rab interactor 3
106566066	12	77244383	77256708	-	1.09484	0.24787	0.000333912	hepatocyte growth factor receptor-like
106580712	20	40949717	40966253	-	1.39471	0.315831	0.000335122	neutrophil cytosol factor 2-like isoform X1
106611595	9	57626097	57639090	+	0.537232	0.12167	0.00033558	calnexin isoform X4
106586893	2	48865813	48866987	+	1.30745	0.296121	0.000335655	C-X-C motif chemokine 11-like
106590301	29	17642169	17647005	-	0.98678	0.223536	0.000336632	serine/threonine-protein kinase greatwall-like isoform X1
106562569	11	35511158	35512547	+	0.678044	0.153617	0.000337168	GDP-fucose transporter 1-like isoform X1
100380717	9	83765878	83776624	-	0.758398	0.171832	0.000337245	heat shock 70 kDa protein 4 isoform X2
100195428	15	96737937	96745925	+	1.64196	0.372054	0.000337541	Matrix metalloproteinase-9 precursor
100195682	7	9018201	9021039	-	0.82337	0.186581	0.000337671	Mitotic spindle assembly checkpoint protein MAD2A
106579373	2	17298890	17321939	-	1.63385	0.370263	0.000337789	sodium- and chloride-dependent transporter XTRP3-like
106600387	3	34807709	34820182	-	0.642554	0.145677	0.000340393	nicastrin
106589405	28	7955448	7974766	-	0.557882	0.12649	0.000340589	DNA mismatch repair protein Msh2
106565340	12	49326190	49341670	-	0.966088	0.219193	0.000345012	prostacyclin synthase-like
106589518	28	13334363	13339618	-	0.582866	0.132268	0.000345938	ER lumen protein-retaining receptor 2
106593758	NW_012350907	526	4251	+	0.842061	0.191099	0.000346069	THUMP domain-containing protein 1-like, partial
106566092	12	80531488	80560973	-	0.886428	0.201237	0.00034819	uncharacterized protein LOC106566092 isoform X1
106601641	1	34119514	34120323	+	1.36606	0.310158	0.000348626	gap junction beta-4 protein-like
106561381	10	97173023	97362694	+	-0.560948	0.127366	0.000348644	transmembrane and TPR repeat-containing protein 2-like
106610194	8	13546244	13569678	-	0.674804	0.153272	0.000350807	lipopolysaccharide-responsive and beige-like anchor protein
100195317	23	41432549	41446622	+	0.537032	0.121995	0.000351117	apoptosis inhibitor 5
106566303	1	131577833	131641363	+	0.636023	0.144501	0.000351228	sarcoplasmic/endoplasmic reticulum calcium ATPase 2-like
106601958	3	87652279	87655926	-	1.57647	0.358173	0.000351228	actin, non-muscle 6.2
106613191	9	127942031	128488990	-	1.20893	0.274647	0.000351228	roundabout homolog 2-like isoform X7
100196533	15	78303443	78362726	-	0.744641	0.169359	0.00035806	Coiled-coil-helix-coiled-coil-helix domain-containing protein 6
106573904	16	43300923	43303206	-	0.77737	0.176827	0.000358727	mpv17-like protein 2
100286439	2	51644531	51651389	-	0.62456	0.142196	0.000365027	stromal membrane-associated protein 1
100196564	3	85524086	85524572	+	0.842495	0.191841	0.000365734	Mediator of RNA polymerase II transcription subunit 9
106570220	14	65014111	65027579	-	1.27791	0.291031	0.000366489	CMP-N-acetylneuraminate-beta-galactosamide-alpha-2,3-sialyltransferase 1-like isoform X2
100306849	15	27725315	27731966	+	0.910072	0.20731	0.000367955	LOW QUALITY PROTEIN: mitotic checkpoint serine/threonine-protein kinase BUB1, partial
106581914	21	19431362	19500615	-	1.48556	0.338512	0.000370031	rho GTPase-activating protein 6-like isoform X2
106594936	1	3006204	3011245	+	0.887914	0.202426	0.00037333	nucleolar and spindle-associated protein 1-like isoform X3
106565799	1	120280059	120282961	-	1.6289	0.371426	0.000374404	uncharacterized protein LOC106565799 isoform X1
106574836	16	79251910	79254356	-	1.13772	0.25946	0.000375069	transcription factor Dp-1-like
106595560	NW_012356223	4	7105	-	0.885012	0.201963	0.000379778	cytosolic endo-beta-N-acetylglucosaminidase-like, partial
106588579	27	15834726	15841242	+	0.798207	0.182336	0.000387104	splicing factor 3B subunit 4-like
106578310	2	13408654	13411320	-	1.19878	0.273878	0.000387857	IGF-like family receptor 1
106584130	23	19825251	19830056	-	0.785174	0.179417	0.000388964	uncharacterized protein LOC106584130
100141318	5	66353879	66372266	-	1.08968	0.249025	0.000389087	FXYD domain containing ion transport regulator 5b precursor
100380294	NW_012349599	1552	5828	+	0.838347	0.191582	0.000389087	Condensin complex subunit 3
106583660	1	21592919	21594270	-	1.45575	0.333144	0.000399663	CD276 antigen-like
106563964	11	93625183	93659409	-	0.907667	0.207759	0.000400182	serine/threonine-protein kinase Chk1
106572223	15	65392767	65403476	+	1.00262	0.229489	0.000400182	histone-lysine N-methyltransferase SUV39H1-like isoform X1
106589848	28	28975992	28985839	+	0.590455	0.135147	0.000400182	leucine-rich repeat-containing protein 59-like
106611299	9	39614302	39615011	-	0.98585	0.225664	0.000400182	protein Mis18-beta isoform X1
106576419	17	47668195	47671457	+	0.941925	0.215815	0.000406791	forkhead box protein M1-like isoform X3
106580998	20	55310993	55344484	+	0.779756	0.178663	0.000406791	Fanconi anemia group J protein
106606431	6	9379055	9395717	+	0.98045	0.224652	0.000406791	metalloproteinase inhibitor 2-like
106607302	6	37360955	37376796	+	0.803617	0.184199	0.000409295	myosin light chain kinase, smooth muscle-like isoform X1
106568170	13	88870137	88875235	-	1.12811	0.258658	0.000411458	S-phase kinase-associated protein 2-like isoform X1
100286581	10	76663826	76671402	+	0.903196	0.207146	0.00041341	coactosin-like protein
106576815	18	6562928	6574681	+	1.02928	0.236242	0.000418926	rab11 family-interacting protein 2-like
106598994	#N/A	#N/A	#N/A	#N/A	1.5509	0.355993	0.000419201	#N/A
100195408	1	130290182	130298951	-	0.539523	0.123868	0.000420261	sphingomyelin phosphodiesterase 4 isoform X1
106560882	10	77252806	77254036	-	1.25915	0.289088	0.000420261	chromosome transmission fidelity protein 8 homolog
100194933	7	42182679	42200681	-	0.78051	0.179306	0.000425022	transcription factor ETV6
100196003	3	61236366	61240431	+	0.95556	0.219541	0.000425437	homologous-pairing protein 2 homolog isoform X1
106569675	14	43580542	43585300	-	1.14363	0.262849	0.000427872	protein FAM102B-like
106575635	17	20633285	20642117	+	1.60584	0.369074	0.000427872	C-X-C chemokine receptor type 1-like
106581244	20	66366245	66393603	-	1.03011	0.23697	0.000434722	uncharacterized protein LOC106581244
106583678	22	51162078	51173155	-	0.573416	0.131959	0.000437509	deoxynucleotidyltransferase terminal-interacting protein 1
106608027	6	67633356	67634137	-	0.563445	0.129763	0.000442965	coiled-coil domain-containing protein 167
106568155	13	89875812	89941947	-	0.816054	0.187994	0.000445135	NAD(P) transhydrogenase, mitochondrial-like isoform X2
106595068	NW_012354498	3730	9733	-	1.20952	0.27878	0.000449293	intestinal mucin-like protein
100380598	2	10825442	10845934	-	1.21123	0.279201	0.000449777	solute carrier family 2, facilitated glucose transporter member 3 isoform X2
106611401	9	44300219	44329307	+	0.811906	0.187176	0.000450474	histone-lysine N-methyltransferase NSD2, partial
100380768	11	33316599	33352813	-	0.768699	0.177257	0.00045217	ras GTPase-activating-like protein IQGAP1
106571050	15	15304245	15356889	+	0.640471	0.14778	0.000456949	YLP motif-containing protein 1-like
106571385	1	149202565	149356586	+	0.847053	0.195488	0.000458364	pro-neuregulin-1, membrane-bound isoform isoform X4
106562296	11	22643999	22647166	-	1.16379	0.268596	0.000458364	centromere protein N-B-like
106605301	5	56269097	56270281	+	0.891811	0.205879	0.000459976	uncharacterized protein LOC106605301
106581692	21	9259742	9276978	+	0.804531	0.185763	0.000461191	serine/threonine-protein kinase 17B-like
106562138	11	16837729	16949643	-	1.11699	0.258007	0.000464264	SH2 domain-containing adapter protein F-like isoform X7
106602562	#N/A	#N/A	#N/A	#N/A	-1.33872	0.309261	0.000464956	#N/A
106572180	15	68043341	68098990	-	0.892161	0.206185	0.000467923	regulator of telomere elongation helicase 1 isoform X2
106582756	22	10464271	10478540	+	0.972619	0.224863	0.000470915	macrophage-stimulating protein receptor-like
100196079	13	6844775	6850160	+	0.625831	0.144734	0.000473473	Small nuclear ribonucleoprotein G
106567456	13	44228085	44315443	-	1.0818	0.250255	0.00047568	1-phosphatidylinositol 4,5-bisphosphate phosphodiesterase eta-2
106575997	17	32067955	32073586	-	0.50505	0.116844	0.000475941	cysteine-rich with EGF-like domain protein 2 isoform X1
106601364	3	67921113	67924349	-	0.993573	0.229872	0.000475941	ras-related protein Rab-3D-like
106608612	7	14735494	14766408	+	-0.877256	0.20308	0.000480865	synaptopodin-2-like isoform X2
100194861	9	23539405	23575506	+	1.3797	0.319402	0.000480865	60 kDa lysophospholipase isoform X2
106612381	#N/A	#N/A	#N/A	#N/A	0.957798	0.221766	0.000481932	#N/A
106564118	12	3409569	3411252	+	0.961895	0.222849	0.000487204	THUMP domain-containing protein 1-like
106576438	17	48081540	48082997	-	1.01604	0.235439	0.000488619	normal mucosa of esophagus-specific gene 1 protein-like
106565291	12	36660548	36661929	+	0.977413	0.226503	0.000488876	ubiquitin-conjugating enzyme E2 C-like
106585288	24	17784192	17792172	-	0.666884	0.154571	0.000490249	B-cell CLL/lymphoma 7 protein family member A-like
106591468	NW_012344116	37664	42098	+	1.23602	0.286579	0.000492942	chromosome transmission fidelity protein 18 homolog, partial
100196024	17	41764153	41766155	+	0.63475	0.147249	0.000497198	ADP-sugar pyrophosphatase isoform X1
100286423	9	60869494	60879300	+	0.616179	0.142934	0.000497198	FACT complex subunit SSRP1 isoform X2
106563511	1	117525519	117538464	-	0.97945	0.227273	0.000499389	protein regulator of cytokinesis 1-like isoform X3
106593289	NW_012349822	8152	13342	-	1.31835	0.306043	0.000503123	M-phase inducer phosphatase 1-like
106572181	15	68040910	68042340	-	1.1732	0.272469	0.000507064	tumor necrosis factor receptor superfamily member 6B-like
100196451	2	10141697	10144193	+	1.04879	0.243589	0.00050725	proto-oncogene tyrosine-protein kinase receptor Ret
106573457	16	25367789	25389935	+	0.594288	0.138248	0.000522691	protein FAM107B-like isoform X1
106587180	26	19413841	19416009	+	0.81529	0.189697	0.000524286	cytochrome b5-like
106587744	26	35457607	35469888	+	1.15082	0.267913	0.000529432	uncharacterized protein LOC106587744 isoform X1
106578873	19	40809211	40809861	-	0.679645	0.158231	0.000529534	histone H3.3
106574107	2	4504342	4508193	-	0.9335	0.217366	0.000530326	CDC42 small effector protein 1-like
106606144	5	78508152	78549971	+	0.500732	0.116597	0.000530326	dolichyl-diphosphooligosaccharide--protein glycosyltransferase subunit STT3B
106580871	20	50419632	50452013	+	0.561533	0.130762	0.000530424	tyrosine-protein kinase BAZ1B-like isoform X1
106577316	18	33861346	33866724	-	1.10697	0.257965	0.000537082	proto-oncogene c-Rel-like
100195426	27	8429264	8446728	+	1.49164	0.347594	0.000537082	myelin-associated glycoprotein
106603165	4	37865521	37872110	-	0.758954	0.176887	0.000538006	cofilin-2-like isoform X1
106561141	10	82317275	82320863	+	1.17133	0.273013	0.000538094	ribonucleases P/MRP protein subunit POP1-like
106569535	14	38496061	38499637	-	0.558609	0.130219	0.000539168	dual specificity mitogen-activated protein kinase kinase 2-like
106576277	17	44685578	44708310	-	1.15419	0.269083	0.000539332	PCNA-interacting partner-like
100136401	9	92210887	92243827	+	0.886784	0.206752	0.000539332	interleukin 1 receptor accessory protein precursor
106576742	18	11027307	11069510	-	-0.590378	0.137668	0.00054062	E3 ubiquitin-protein ligase UBR2-like isoform X2
106613709	10	17375338	17376030	+	0.767257	0.178951	0.000542286	vimentin-type intermediate filament-associated coiled-coil protein-like
106573548	16	39666825	39672514	-	0.641168	0.149557	0.000542872	ras-related protein Rab-8A-like
106581684	21	7314000	7329861	-	0.528606	0.123322	0.000544149	SOSS complex subunit B2-like
106589378	28	6534570	6548185	-	-0.542509	0.126573	0.000544329	tankyrase-2 isoform X1
106587265	26	15259254	15310372	-	0.590829	0.137878	0.000546291	piezo-type mechanosensitive ion channel component 1-like isoform X1
100306785	25	9736669	9749094	+	1.21467	0.283488	0.000546903	Integrin beta-2 precursor
100195082	18	28112700	28114748	-	-0.746725	0.174409	0.000554075	Zinc finger protein 503
106583413	22	43799689	43819905	+	0.5321	0.12428	0.000554075	WD repeat-containing protein 1-like isoform X1
106572204	15	66297517	66361889	+	1.09761	0.25666	0.000565547	cytosolic acyl coenzyme A thioester hydrolase
100136430	21	43350644	43354963	-	0.80039	0.187278	0.000571948	60 kDa heat shock protein, mitochondrial isoform X2
106602913	4	31471239	31471886	-	1.0506	0.24599	0.00057898	claudin-4-like
106582020	1	22039659	22042400	+	0.544173	0.127436	0.000579943	abscission/NoCut checkpoint regulator-like isoform X1
106607046	6	29810866	29812359	-	0.995146	0.233118	0.000582874	kinetochore protein Spc24-like
106604487	1	48325873	48352744	+	0.76356	0.178953	0.000587721	protein FAM83H-like
100534607	13	51820666	51821668	+	1.16037	0.271977	0.00058773	interleukin 4/13A precursor
106577444	18	39455344	39512424	+	1.17044	0.274327	0.00058773	leucine-rich repeat and calponin homology domain-containing protein 4-like
106603062	4	35206456	35208358	-	1.1544	0.270596	0.000588101	diamine acetyltransferase 1
106599291	3	25486294	25531202	+	1.38524	0.324849	0.00059251	E3 ubiquitin-protein ligase HECW1-like isoform X2
106564931	12	23343378	23347888	-	0.627507	0.14724	0.000598077	rho GDP-dissociation inhibitor 1-like
106577130	18	22782118	22789759	+	0.603588	0.141672	0.000601	tetraspanin-14-like
100286477	23	29428728	29453622	+	1.23744	0.290454	0.000601	myosin-Ie
106568502	13	100325204	100402715	-	1.16848	0.274291	0.000601239	mitogen-activated protein kinase 10 isoform X5
106580787	20	47028360	47032329	+	0.718227	0.168602	0.000601239	protein NLRC3-like
106564547	12	15100251	15110238	+	0.935036	0.219563	0.000603828	centromere protein M-like isoform X1
100306817	17	14187256	14195678	-	0.584056	0.137149	0.000603828	obg-like ATPase 1
106561728	10	110466066	110477816	+	0.715468	0.168058	0.000606323	E3 ubiquitin-protein ligase TRIM21-like isoform X1
106579174	19	55533702	55543630	-	1.30809	0.307323	0.00060772	receptor-type tyrosine-protein phosphatase H
106590592	29	31202072	31217705	+	1.08994	0.256088	0.000607916	uncharacterized protein LOC106590592 isoform X1
100196701	22	46727139	46756232	+	1.19761	0.281405	0.00060827	transglutaminase 2
106588882	2	52394158	52404485	-	0.871697	0.204924	0.000613387	protein transport protein Sec23B
106577834	18	58453554	58456533	+	1.00828	0.237053	0.000613834	growth-regulated alpha protein-like
106591130	NW_012343467	4662	20147	+	0.636626	0.149743	0.000618756	vascular endothelial growth factor receptor 3-like
106565448	12	53664094	53669448	+	0.684888	0.161236	0.000628596	cyclin-dependent kinase 4-like
106578960	19	45628784	45636833	+	0.618673	0.145691	0.000629773	AMSH-like protease isoform X1
100196183	3	26206886	26208619	-	0.903949	0.212874	0.000629773	Glutamine synthetase
106604364	5	16109517	16110624	-	0.850612	0.200302	0.000629773	thiosulfate sulfurtransferase/rhodanese-like domain-containing protein 1
106609163	7	37285362	37310432	+	1.04091	0.245128	0.000629773	lymphoid-restricted membrane protein-like
106594306	NW_012352392	7046	7606	-	0.836635	0.196996	0.000629773	globoside alpha-1,3-N-acetylgalactosaminyltransferase 1-like
106571613	#N/A	#N/A	#N/A	#N/A	0.53261	0.125439	0.000630513	#N/A
106577470	2	12236891	12256772	+	1.09151	0.257093	0.000631059	uncharacterized protein LOC106577470 isoform X1
106585805	24	36983282	37038968	+	0.96817	0.228102	0.000633176	drebrin-like protein B
106608353	6	85230055	85237719	+	1.1311	0.266484	0.000633176	mitochondrial fission regulator 2
106606433	6	9250266	9261272	+	1.49982	0.353415	0.000634576	uncharacterized protein LOC106606433 isoform X3
106578846	19	38995860	39069717	-	0.880692	0.207678	0.000642925	canalicular multispecific organic anion transporter 2-like isoform X1
106581896	21	18760330	18768557	+	0.701084	0.165387	0.000646515	interferon alpha/beta receptor 1a-like isoform X1
106585111	24	10548878	10553728	+	1.18351	0.279262	0.000648567	cholesterol 25-hydroxylase-like protein isoform X1
106609123	7	32906325	32908949	-	0.910427	0.214922	0.000653522	L-lactate dehydrogenase B chain
106562290	11	22447112	22448171	-	1.07585	0.253992	0.000653903	DNA replication complex GINS protein PSF2-like
106585058	24	13842185	13849679	-	0.869721	0.205406	0.00065759	tissue-type plasminogen activator-like isoform X2
106571107	15	19868515	19956505	-	1.2216	0.288635	0.000662326	coiled-coil domain-containing protein 85C-B-like isoform X2
100194524	5	66831064	66832030	+	-1.2751	0.30133	0.000664126	small heat shock protein-like isoform X1
106580854	20	49890933	49928652	-	0.791655	0.187107	0.000665157	alpha-actinin-4 isoform X2
100196635	13	35619091	35622285	+	-0.725122	0.171408	0.000666322	homeobox protein HoxC10aa
106569693	14	43591499	43603270	-	1.14299	0.270191	0.000666322	protein FAM102B-like
106587773	26	36482396	36488823	+	0.928441	0.219536	0.000669306	transaldolase-like, partial
106560648	10	51411022	51413232	-	1.30028	0.307477	0.000669497	P-selectin-like
106603227	1	42162744	42163347	-	0.855457	0.202396	0.000675341	guanine nucleotide-binding protein G(I)/G(S)/G(O) subunit gamma-2-like
106605450	5	59271329	59285796	+	0.976646	0.231075	0.000675341	ras GTPase-activating-like protein IQGAP3 isoform X2
106575937	17	29728565	29730577	-	1.06272	0.251515	0.000678642	C5a anaphylatoxin chemotactic receptor 1-like
106562981	11	54955473	54968233	-	0.595662	0.140995	0.000679804	set1/Ash2 histone methyltransferase complex subunit ASH2-like isoform X1
106585173	24	7038843	7044988	-	0.995439	0.235807	0.000688708	BAG family molecular chaperone regulator 4-like
106593958	NW_012351411	1785	3067	+	-1.17106	0.277411	0.000688708	kelch domain-containing protein 1-like
106609744	7	53947914	53963564	+	1.31363	0.311279	0.000692149	transcription factor E2F7-like
106568578	13	105021139	105029850	+	1.09893	0.260553	0.000699038	thymic stromal cotransporter homolog
106608189	6	74500128	74511238	+	0.965491	0.229037	0.000705516	lactoylglutathione lyase-like
106587358	26	23414974	23425635	-	0.705954	0.167538	0.000709804	genetic suppressor element 1-like, partial
106573607	16	37630063	37635706	-	1.00572	0.238704	0.000710315	follistatin-related protein 3-like isoform X1
106592799	NW_012348835	2800	4355	-	1.53401	0.364113	0.000710315	uncharacterized protein LOC106592799
106593443	NW_012350172	221	10016	-	1.31681	0.312547	0.000710315	fructose-1,6-bisphosphatase 1-like
106603918	4	74582361	74587654	+	0.987491	0.234405	0.000710543	deoxycytidine kinase-like
100306773	16	14930778	15013506	+	-0.650888	0.15452	0.000711363	Thromboxane-A synthase
100196371	13	99044901	99052336	+	0.637096	0.151296	0.00071466	brix domain containing 2
106568933	14	13950140	13954838	-	0.693273	0.16469	0.000718344	choline-phosphate cytidylyltransferase A-like isoform X1
106597775	NW_012368642	247	1406	-	1.5054	0.357931	0.000729148	protein-glutamine gamma-glutamyltransferase 2-like, partial
106599069	3	14469833	14472099	-	0.681181	0.162025	0.00073341	stress-associated endoplasmic reticulum protein 1
106606404	6	7687146	7691610	-	0.714403	0.169921	0.00073341	RNA-binding protein with serine-rich domain 1-like
106603659	4	60872276	60875348	+	1.22781	0.292213	0.000739481	heat shock cognate 70 kDa protein
106588411	27	9935579	9937746	-	1.09807	0.261478	0.000746392	transcription factor 19-like
106579332	19	49858496	49862113	+	0.849646	0.202353	0.000747954	sclerostin
106576755	18	10475305	10476294	+	1.54858	0.36883	0.000748078	hydroxycarboxylic acid receptor 2-like
106575602	17	19728715	19730602	+	0.91019	0.216862	0.000752586	gap junction gamma-1 protein-like
106566596	13	15116399	15136282	+	0.884248	0.210784	0.000758195	solute carrier family 17 member 9-like
106567942	13	75536161	75539227	-	0.824451	0.196626	0.000764494	cytoskeleton-associated protein 2-like
106589839	28	28810362	28815411	+	1.28503	0.306604	0.000770054	metalloproteinase inhibitor 2-like
106565458	12	53985858	53999288	-	0.593676	0.141663	0.00077028	coatomer subunit zeta-1
100195188	11	19697532	19700013	+	0.686925	0.163971	0.000774654	DNA replication complex GINS protein PSF2
106609229	7	34651124	34654675	-	0.515953	0.123211	0.000779374	transmembrane protein 209-like
100270810	13	59937302	59954525	-	1.39693	0.3338	0.000786674	neutrophil cytosol factor 1
106579621	19	74316535	74317857	+	1.55063	0.370539	0.000786674	myelin-associated glycoprotein-like
106601744	3	80010204	80015834	-	0.62481	0.149307	0.000786674	ras-related C3 botulinum toxin substrate 1-like
106589082	27	38836624	38855460	-	0.830001	0.198397	0.000789643	KH domain-containing, RNA-binding, signal transduction-associated protein 1-like
106565937	12	74777772	74785247	+	1.55194	0.37104	0.000791991	tumor necrosis factor receptor superfamily member 21-like isoform X1
100380349	13	40689549	40697774	-	0.512851	0.122675	0.000798736	microtubule-associated protein RP/EB family member 1 isoform X1
100380772	3	67195834	67211591	-	0.666012	0.159335	0.000800371	DNA (cytosine-5)-methyltransferase 1 isoform X3
106586597	25	31183171	31187472	-	1.03342	0.247268	0.000801772	spindle and kinetochore-associated protein 3 isoform X1
106606750	6	19819987	19822639	+	0.550736	0.131808	0.000804795	ER lumen protein-retaining receptor 2-like
106613482	10	7506843	7557136	-	1.02236	0.244729	0.000805616	kinesin-like protein KIF14 isoform X1
106582163	21	31691586	31694800	-	1.44931	0.34694	0.000805616	syntaxin-19-like
106577522	18	46047861	46076713	-	0.698068	0.167137	0.000807793	echinoderm microtubule-associated protein-like 3 isoform X1
106583797	22	59808411	59890494	-	1.21728	0.291525	0.000810918	POC1 centriolar protein homolog A
106596213	3	1000736	1054745	-	1.33922	0.320791	0.000813277	macrophage mannose receptor 1-like, partial
106561817	10	113675829	113685827	-	1.35133	0.323738	0.000814804	intestinal mucin-like protein
106586921	25	49443056	49446397	+	0.652167	0.156264	0.000816007	tubulin alpha chain-like
106589381	28	6714199	6738756	+	0.917203	0.21981	0.000817415	kinesin-like protein KIF20A
106571225	1	148216544	148240194	-	0.520707	0.124809	0.000819225	lamin-B1
106610269	8	16760734	16761852	+	1.22047	0.292616	0.000822737	forkhead box protein E1-like
106567088	13	36236306	36240654	-	0.767945	0.184162	0.000825476	SAP domain-containing ribonucleoprotein-like isoform X1
106603080	4	35566026	35582116	-	0.992712	0.238165	0.000831346	uncharacterized protein LOC106603080
100194748	1	91110256	91122925	+	0.774118	0.185787	0.000835959	phosphoglycerate mutase 1
106587480	26	25412805	25419512	+	1.18176	0.28363	0.000835959	transcription factor PU.1-like
106612540	9	108156789	108188600	+	0.750182	0.180064	0.000836034	alpha-2-macroglobulin-like isoform X2
106588345	27	11687422	11692177	+	0.621285	0.14916	0.000838909	CDC42 small effector protein 1-like
106560844	10	79423863	79483604	-	0.985761	0.236686	0.000839665	core-binding factor subunit beta-like isoform X1
106569231	14	24859915	24881695	-	-0.737777	0.17716	0.000840055	transient receptor potential cation channel subfamily A member 1-like
106581786	21	15946624	15950023	+	1.04583	0.251137	0.000840055	retinol dehydrogenase 3-like
106597527	NW_012366320	6	4891	+	-1.5386	0.369481	0.000840055	myosin heavy chain, fast skeletal muscle-like, partial
106566211	12	87364906	87369377	-	0.830424	0.199522	0.000846785	mesencephalic astrocyte-derived neurotrophic factor-like
106566172	12	84540626	84542634	-	0.727797	0.174861	0.000846785	proline-rich protein 13
106586200	25	13459293	13476663	+	1.54338	0.371039	0.000853678	polypeptide N-acetylgalactosaminyltransferase 3-like
100270811	29	24461461	24467397	-	1.3295	0.319614	0.000853678	neutrophil cytosol factor 2
106607488	6	40671904	40674295	+	-0.807984	0.194252	0.000853678	homeobox protein Hox-B10a-like
106594092	NW_012351839	6074	11897	-	1.37677	0.331005	0.000853678	acidic amino acid decarboxylase GADL1-like
100380396	12	60164573	60175696	-	0.688258	0.165499	0.000855535	ATPase family AAA domain-containing protein 3 isoform X1
106587056	26	5199069	5281005	+	0.825801	0.198593	0.000856479	cytoskeleton-associated protein 5-like
106585160	24	7559048	7559272	-	0.563175	0.135499	0.000863166	small integral membrane protein 15
100195990	26	23878135	23881302	-	1.01413	0.24408	0.00086713	centromere protein N
106560438	10	40189134	40201249	-	0.611049	0.147099	0.000870053	calcium-binding mitochondrial carrier protein SCaMC-1
106608465	7	2012769	2025399	-	0.963711	0.232052	0.000873191	piggyBac transposable element-derived protein 4-like
106577638	18	53599277	53614163	-	-0.744573	0.179305	0.000874211	netrin-3-like
106576619	17	55648382	55656322	-	0.752946	0.181364	0.000877302	cysteine and glycine-rich protein 2
106602901	4	31125041	31142746	+	0.508464	0.12248	0.000877302	cellular tumor antigen p53 isoform X1
106562599	11	36643505	36646094	-	1.24785	0.300685	0.000881933	chondroitin sulfate synthase 1-like
106583121	22	26010259	26043773	-	1.37497	0.331416	0.000884786	ethanolamine kinase 1-like
106604654	5	30094658	30105935	-	0.757381	0.182569	0.000885378	catenin delta-1-like isoform X7
106561857	10	115536126	115551823	+	0.791521	0.190859	0.00088962	annexin A2-like
106570361	14	72083237	72167091	-	0.550429	0.132729	0.00088962	zinc finger protein 40-like isoform X2
106586138	25	10090177	10095915	-	0.892161	0.215163	0.000891219	uncharacterized protein LOC106586138
106567125	13	37540293	37564305	-	0.750565	0.181067	0.000894583	pleckstrin homology domain-containing family G member 5-like isoform X6
106612394	1	94323259	94346123	-	0.910103	0.219573	0.000895305	DNA replication ATP-dependent helicase/nuclease DNA2
106572957	15	102247234	102256115	+	1.29603	0.312828	0.000901584	transketolase-like, partial
100286676	12	14829470	14842856	+	0.971292	0.234538	0.00090741	centromere protein M isoform X1
106582888	22	15813158	15817319	-	0.935355	0.225942	0.000912686	protein FAM83D-like isoform X2
106572468	15	82644163	82653754	-	1.42849	0.345138	0.000914881	protein SOGA1-like isoform X1
106607701	1	65692181	65694663	+	0.593495	0.143431	0.000917679	ubiquitin-conjugating enzyme E2 D4-like isoform X2
106570457	14	77650174	77655603	-	0.854513	0.206564	0.000920597	tissue factor pathway inhibitor 2 isoform X1
106602056	3	91860366	91869296	+	0.62491	0.151095	0.000923665	cytosolic endo-beta-N-acetylglucosaminidase-like
106578444	2	14861216	14877932	+	0.765763	0.185168	0.000924452	E3 ubiquitin-protein ligase HACE1 isoform X2
106603543	4	48905337	48908770	+	0.761354	0.184138	0.000927047	cytoskeleton-associated protein 2-like isoform X1
106600543	#N/A	#N/A	#N/A	#N/A	-0.655737	0.158647	0.000932023	#N/A
106608135	#N/A	#N/A	#N/A	#N/A	0.800586	0.193713	0.000933195	#N/A
106565815	12	68854826	68856272	+	0.725494	0.175642	0.00094192	actin-related protein 2/3 complex subunit 4-like
106580584	20	37541237	37551813	+	0.762237	0.184558	0.000943149	glycerol-3-phosphate acyltransferase 3-like
106589833	28	28544735	28545658	-	1.02278	0.247695	0.000946076	suppressor of cytokine signaling 3-like
106606275	6	2659285	2666175	-	0.502906	0.121803	0.000946781	meteorin-like protein, partial
106595104	NW_012354638	189	6604	-	0.669903	0.162415	0.000963588	histone-arginine methyltransferase CARM1-like
106586193	2	41004159	41006374	-	0.903362	0.219185	0.000975535	dispanin subfamily A member 2b-like
106571540	15	33482796	33483603	+	1.27299	0.308973	0.000979931	12-(S)-hydroxy-5,8,10,14-eicosatetraenoic acid receptor-like
106583903	23	2324323	2345028	+	1.03857	0.252064	0.000979931	uncharacterized protein LOC106583903 isoform X1
106560917	10	76168875	76173682	+	1.14793	0.278668	0.000982417	olfactomedin-4-like
106578535	19	16629584	16666762	+	0.838735	0.203675	0.000987398	ATP-dependent 6-phosphofructokinase, platelet type-like isoform X6
100136944	3	86855627	86867341	-	-0.549249	0.133491	0.00100181	mitogen-activated protein kinase kinase 6a
100380564	13	8734773	8742734	+	0.985099	0.239444	0.00100277	tyrosine-protein phosphatase non-receptor type 7 isoform X1
106564891	1	121648323	121651720	+	0.508406	0.123609	0.00100688	prenylcysteine oxidase-like
106577147	18	22138325	22153326	-	-0.575657	0.139977	0.00100755	coiled-coil domain-containing protein 6-like
106602864	4	28533875	28542699	-	0.93801	0.228081	0.00100755	tripartite motif-containing protein 16-like
106563734	11	82873143	82886421	+	1.12571	0.273742	0.00100774	vascular endothelial growth factor C-like
100196631	20	60391567	60393140	-	0.691644	0.168268	0.00101543	thymocyte nuclear protein 1
106565757	12	71170451	71175370	+	0.61056	0.148552	0.00101608	protein SAND-like
106605138	5	52262878	52268614	-	0.784157	0.19084	0.00102011	rhomboid-related protein 2-like
106579730	19	79412064	79421288	+	0.914968	0.222767	0.00102691	telomeric repeat-binding factor 1
106588522	27	13960290	13978734	-	1.46302	0.356243	0.00102835	mucin-2-like, partial
106584721	23	43509853	43516681	-	0.969062	0.235988	0.00102932	sulfide:quinone oxidoreductase, mitochondrial-like
106579636	19	73333725	73338590	+	1.41269	0.344048	0.00103008	chorion-specific transcription factor GCMb isoform X1
106582650	22	3254777	3264431	+	0.823905	0.200675	0.00103115	syndecan-4-like
106574143	16	52465106	52477058	-	0.736515	0.179424	0.00103388	guanine nucleotide-binding protein subunit beta-4
101448061	13	35982586	35985538	+	1.02087	0.24876	0.00103786	insulin-like growth factor binding protein 6 paralog B2 precursor
106600420	3	33887246	33888711	-	0.915946	0.223376	0.00105234	B-cell lymphoma/leukemia 10-like
106588407	27	9997001	10002037	+	0.837829	0.204386	0.00105712	carboxy-terminal kinesin 2-like
100380696	17	23759670	23788185	+	1.0842	0.264574	0.00106241	fibronectin
106612687	9	102305648	102309107	+	0.685249	0.167239	0.00106392	calpain small subunit 1-like
106603575	4	47448327	47450397	-	0.644328	0.157265	0.00106474	flavin-containing monooxygenase FMO GS-OX4-like
106560269	10	31138521	31158296	+	1.12426	0.274709	0.00108419	platelet-derived growth factor receptor alpha-like
106599664	3	27217989	27325883	+	1.04265	0.254778	0.00108424	laminin subunit alpha-3-like isoform X4
106580802	20	47443415	47454271	+	1.0739	0.262442	0.00108544	cylicin-1-like isoform X5
106566879	13	25240802	25255068	+	0.663533	0.16224	0.00109472	solute carrier family 35 member E2-like
106613698	10	17099292	17104425	+	0.737374	0.180311	0.0010957	ras-related protein Rab-8A
106582890	22	15845010	15860420	-	0.524083	0.128175	0.00109803	DNA topoisomerase 1-like
106601288	3	67352949	67361895	+	0.99342	0.242973	0.00109806	ribonucleoprotein PTB-binding 1-like isoform X2
106611856	9	67106154	67163921	-	0.613405	0.150033	0.00109806	protein diaphanous homolog 1-like
106610656	9	7024281	7039328	+	0.995528	0.24353	0.00109908	grainyhead-like protein 3 homolog isoform X2
106585005	24	15424869	15439322	+	0.582192	0.142458	0.00110373	pleckstrin homology domain-containing family A member 2-like isoform X1
106577324	18	34329747	34340386	-	0.715077	0.174996	0.00110471	actin-related protein 2-A-like isoform X1
106608315	6	82122843	82126632	-	0.983823	0.24076	0.00110471	zygotic DNA replication licensing factor mcm3-like
106567141	1	127876891	127884382	+	0.623555	0.152627	0.00110749	HAUS augmin-like complex subunit 4 isoform X2
106600619	3	48737544	48743044	+	-0.803903	0.196919	0.00112074	macoilin-like
106578865	#N/A	#N/A	#N/A	#N/A	1.09458	0.268121	0.00112074	#N/A
106568731	14	9188777	9190394	-	1.15196	0.282239	0.00112432	regulator of G-protein signaling 5-like
106611736	9	63974206	63975108	+	1.50184	0.36808	0.00112987	transcription factor Sox-3
106564453	12	12414385	12422858	+	1.02533	0.25136	0.00113421	beta-1,3-galactosyltransferase 2-like
106603280	1	41979034	41982454	+	0.615294	0.150863	0.00113647	dnaJ homolog subfamily C member 5B-like
106577684	18	54952810	54953970	-	0.632565	0.155194	0.00114811	RNA-binding protein 4B-like
106605697	5	68049423	68073924	-	0.797114	0.195646	0.00115576	B-cell lymphoma 3 protein homolog isoform X1
106597635	NW_012367313	1732	2307	+	1.20142	0.294914	0.00115655	uncharacterized protein LOC106597635
106572261	15	63769561	63773123	-	0.56377	0.138415	0.00115935	transforming protein RhoA
106589840	#N/A	#N/A	#N/A	#N/A	1.25447	0.308018	0.00116026	#N/A
106576545	2	10008834	10019228	-	-0.91292	0.224208	0.00116398	gamma-enolase-like
106608769	7	17492922	17509735	-	-1.05853	0.259977	0.00116398	netrin-1-like isoform X1
106562063	11	14953559	14955022	-	0.505246	0.124173	0.00117651	adenine phosphoribosyltransferase-like
106591891	NW_012347358	2754	9931	+	0.641639	0.157697	0.00117651	sodium/bile acid cotransporter 7-like isoform X1
106566442	13	7610286	7633127	+	1.36553	0.335642	0.00117768	solute carrier organic anion transporter family member 4A1-like isoform X1
106572377	15	81861829	81866209	-	0.964685	0.237367	0.00119801	histone-lysine N-methyltransferase SUV39H1-like
106602166	4	3468837	3483986	+	1.31218	0.32291	0.00119807	CD209 antigen-like
106572900	15	98601204	98605129	+	0.902409	0.222083	0.00119834	pancreatic progenitor cell differentiation and proliferation factor B-like
106578269	#N/A	#N/A	#N/A	#N/A	1.14424	0.281714	0.00120619	#N/A
100286524	12	79234274	79271292	-	0.729402	0.179605	0.00120654	cysteine and glycine-rich protein 1 isoform X1
100380731	13	25176919	25200557	+	0.865685	0.213159	0.00120654	NAD kinase isoform X2
100286687	14	78468104	78471623	-	0.601034	0.147993	0.00120654	Chromatin accessibility complex protein 1
106570811	15	576059	581230	-	0.50384	0.124102	0.00121144	histone H2A.V isoform X1
106592095	NW_012347645	2432	9387	-	0.674458	0.166143	0.00121255	NACHT, LRR and PYD domains-containing protein 1-like
106588086	2	45818401	45854681	+	1.14469	0.282009	0.00121399	integrin alpha-L-like isoform X1
106604587	1	48821752	48836917	-	0.725343	0.178762	0.00122083	PDZ and LIM domain protein 1-like
106603146	4	37526710	37537703	-	0.559675	0.13794	0.00122113	U4/U6.U5 tri-snRNP-associated protein 1-like
106607495	6	40457209	40460339	-	1.10301	0.272018	0.00123314	uncharacterized protein LOC106607495 isoform X2
106581131	20	60961873	60966280	+	0.908369	0.224039	0.00123442	tubulin delta chain
106599435	3	21119698	21134783	-	1.14666	0.282868	0.00123788	laminin subunit gamma-2 isoform X2
106576683	18	13211865	13243039	+	0.662833	0.16356	0.00124323	uncharacterized protein LOC106576683
106581219	20	64245202	64249684	+	1.47902	0.364992	0.00124325	collagenase 3-like
106602894	4	30851310	30863293	+	0.887947	0.219126	0.00124325	mitochondrial ornithine transporter 1
106602819	4	25029935	25107189	-	1.34052	0.331163	0.00126284	integrin alpha-X-like isoform X1
106579408	19	62221660	62283389	-	1.15632	0.285708	0.00126575	integrin alpha-X-like
106609493	7	44960377	44979198	-	0.763861	0.188853	0.00127753	guanine nucleotide-binding protein G(i) subunit alpha-1
106588319	27	12327236	12355614	+	1.03466	0.255826	0.00127845	mothers against decapentaplegic homolog 4-like isoform X1
106589898	28	30838516	30848950	-	1.24684	0.308419	0.00128682	alpha-N-acetylgalactosaminide alpha-2,6-sialyltransferase 2-like
106575038	16	87008042	87009645	-	1.16183	0.287474	0.00129242	C5a anaphylatoxin chemotactic receptor 1-like
106605841	5	70554057	70572884	+	0.863712	0.213729	0.00129357	solute carrier family 2, facilitated glucose transporter member 1-like isoform X1
106584094	23	17618061	17619405	-	1.26828	0.314066	0.00130791	regulator of G-protein signaling 2-like
106563044	11	57501646	57514334	+	0.768549	0.19034	0.00130876	lipoma HMGIC fusion partner-like 2 protein
106584323	23	26361479	26364218	+	0.612508	0.151689	0.00130876	calreticulin-like
106587473	26	25260959	25271588	+	1.41315	0.350017	0.00131014	plakophilin-3-like isoform X2
106590126	29	11207573	11209412	+	0.645126	0.159831	0.00131523	GTPase IMAP family member 4-like
100846957	20	3991762	3993711	-	0.569564	0.141139	0.00131802	X-box-binding protein 1
106611634	9	59556464	59563051	+	0.50142	0.124249	0.00131802	nuclear cap-binding protein subunit 1-like isoform X1
106581529	20	80543673	80544873	+	0.693861	0.171978	0.00132206	transmembrane protein 97
106569903	14	60832480	60839607	-	-0.547492	0.135753	0.00133024	DNA-binding protein RFX5-like isoform X3
106560773	10	63400558	63414721	+	0.538289	0.133485	0.00133083	sorting nexin-1-like isoform X1
106586112	25	7722369	7750666	+	0.767378	0.190293	0.00133083	actin-related protein 3-like
106600914	3	53611868	53635732	-	0.54957	0.136364	0.00134364	manganese-transporting ATPase 13A1-like
106600835	3	57444299	57448341	-	-0.657283	0.163114	0.00134603	homeobox protein Hox-B9a-like
106599032	NW_012392248	215	2292	-	0.818442	0.203207	0.00135639	DNA helicase B-like
106564865	12	26105483	26111777	+	0.861854	0.214023	0.00135951	protein FAM161A-like isoform X1
100196702	13	21317569	21327432	+	0.766937	0.190474	0.00136123	Glucose-6-phosphate 1-dehydrogenase
106606561	6	14060892	14080742	-	1.25824	0.312607	0.00136794	prolactin receptor-like
106585203	24	5709101	5713009	+	-0.525736	0.130641	0.00137034	UPF0600 protein C5orf51 homolog
106566059	12	77573383	77574259	-	0.521462	0.129611	0.00137496	glutathione peroxidase 1-like
106613898	1	101978660	101982198	-	-0.622715	0.154964	0.00140082	homeobox protein Meis1 isoform X2
106582657	22	3871631	3873499	-	0.541146	0.134674	0.00140137	14-3-3 protein beta/alpha-1
106589469	28	11298454	11302805	-	0.719853	0.179168	0.00140305	uncharacterized protein LOC106589469
106564558	12	15216729	15223005	+	0.519455	0.129356	0.00141344	ADP-ribosylation factor-binding protein GGA1-like, partial
106570813	15	602020	665203	-	1.21886	0.303745	0.00143018	cytoskeleton-associated protein 2-like
106605635	5	65934818	65939205	+	1.4028	0.349622	0.00143184	B-cell receptor CD22-like isoform X3
106576270	17	44492528	44504514	+	-0.965911	0.240902	0.00144394	transcription factor Spi-C-like isoform X2
106599423	3	21383086	21385323	-	1.09049	0.27196	0.00144394	centromere protein L
106580961	20	53442165	53444666	-	1.18663	0.296034	0.00144985	high affinity immunoglobulin gamma Fc receptor I-like isoform X2
106579518	19	67653871	67657008	-	0.784891	0.195927	0.00146375	uncharacterized protein LOC106579518 isoform X2
106587817	26	37935405	37950756	-	-0.975631	0.243592	0.00146804	hyaluronan and proteoglycan link protein 3-like isoform X2
106575472	17	16638139	16644622	+	0.939123	0.234516	0.00147124	disintegrin and metalloproteinase domain-containing protein 9-like
100380669	6	30111808	30130008	-	0.658845	0.164551	0.00147401	myosin-9 isoform X1
106601998	#N/A	#N/A	#N/A	#N/A	0.921262	0.230111	0.00147522	#N/A
106590211	29	15978366	15984917	-	0.695293	0.17369	0.00147727	transmembrane protein 241 isoform X1
100194922	2	45731900	45741945	-	0.501723	0.12534	0.00147734	phosphatase 1 regulatory subunit 12C
100196380	19	52164148	52167498	-	1.20064	0.300003	0.00148144	Antigen KI-67
106571170	15	23057513	23067208	+	-0.770346	0.192529	0.00148512	sine oculis-binding protein homolog
100169859	29	41256516	41267823	+	0.720287	0.180019	0.00148512	myeloid differentiation primary response protein MyD88
106609122	7	32875913	32878145	+	0.501205	0.125269	0.00148512	vesicle transport protein GOT1B-like
106598436	3	9567686	9589112	-	0.845712	0.211528	0.0015016	tyrosine-protein kinase JAK1-like isoform X1
106574696	16	75885626	75887488	-	1.22959	0.307556	0.0015017	gap junction gamma-1 protein-like
106579596	19	70593970	70603903	+	1.21717	0.304477	0.00150292	cytochrome c oxidase subunit 4 isoform 1, mitochondrial-like
106577510	18	45585593	45588609	+	1.25216	0.313271	0.00150541	acidic mammalian chitinase-like
106573269	16	14737677	14818668	-	0.899517	0.225246	0.00152614	UPF0606 protein KIAA1549-like
100195200	24	8380494	8405637	-	0.635828	0.159239	0.00152875	dual specificity testis-specific protein kinase 2 isoform X2
106575026	16	86814990	86823032	-	0.857385	0.214747	0.00152926	progesterone-induced-blocking factor 1-like isoform X1
106570886	15	3267639	3268753	-	1.12569	0.281983	0.00153036	C-C motif chemokine 4-like
100306741	11	73068642	73074954	-	0.794116	0.198958	0.00153371	Claudin-like protein ZF4A22
106585463	24	24788534	24789612	+	0.515298	0.129109	0.00153391	small nuclear ribonucleoprotein Sm D3-like
106580614	20	39485137	39487483	+	0.883343	0.221393	0.00154105	zinc finger protein 367
106567410	13	48493910	48578351	-	0.790447	0.19825	0.00155638	sarcoplasmic/endoplasmic reticulum calcium ATPase 1-like isoform X1
106612757	9	110648551	110661470	-	0.966661	0.242524	0.00156386	inverted formin-2-like, partial
106566812	13	27125493	27149986	-	0.990221	0.248507	0.00157045	rho guanine nucleotide exchange factor 10-like protein isoform X2
106562989	11	55221786	55224841	-	0.610244	0.15316	0.00157152	tubulin alpha chain, testis-specific-like
106563558	#N/A	#N/A	#N/A	#N/A	1.47119	0.369601	0.0015963	#N/A
106560984	10	73050053	73078016	-	0.838924	0.210847	0.00160545	SRSF protein kinase 2-like isoform X3
106563313	11	64404746	64409415	-	0.752434	0.18911	0.00160545	anaphase-promoting complex subunit 2-like
100195087	13	65804528	65814287	+	0.572692	0.143997	0.00161592	Lathosterol oxidase
106586512	25	28524941	28538272	-	0.967121	0.243226	0.00161989	coiled-coil domain-containing protein 138-like
106604401	5	15356116	15359440	-	1.32415	0.333006	0.00161989	SH2 domain-containing protein 4A-like
100380330	4	46191993	46228709	-	0.578867	0.145621	0.00162603	retinoblastoma-associated protein
106611509	9	50788276	50876731	-	0.666021	0.167603	0.00163432	protocadherin-19-like isoform X6
106572591	15	88102538	88128437	+	0.677278	0.170665	0.00167025	arf-GAP with GTPase, ANK repeat and PH domain-containing protein 2-like
106562237	11	21240353	21254164	-	0.683975	0.172375	0.00167278	nestin-like isoform X3
106571169	#N/A	#N/A	#N/A	#N/A	1.31985	0.332701	0.00167804	#N/A
106574403	16	69948959	69972382	-	-0.921999	0.232527	0.00168733	neuronal membrane glycoprotein M6-b-like isoform X1
106584678	23	42149242	42192060	-	0.907834	0.228952	0.00168733	unconventional myosin-IXa-like isoform X2
100286475	NW_012348009	2014	15983	-	0.952902	0.240316	0.00168733	Src kinase-associated phosphoprotein 2
106608182	6	74708480	74713555	-	-1.16764	0.294523	0.00169056	uncharacterized protein LOC106608182 isoform X2
106569613	14	41307209	41311212	+	0.682318	0.172177	0.00170101	uncharacterized protein LOC106569613 isoform X1
106582526	21	54224744	54288704	-	1.02584	0.258915	0.00170564	fibronectin-like isoform X1
106585098	24	11121486	11133778	-	0.828019	0.209075	0.00171663	cell division cycle-associated protein 2-like
106582459	21	50531394	50532503	-	0.957464	0.241796	0.00171988	G-protein coupled receptor 1-like
106569171	14	27975672	28086478	-	0.52761	0.13327	0.00172487	cadherin-2-like
106569987	14	58275616	58299964	-	0.566728	0.14316	0.00172555	chromodomain-helicase-DNA-binding protein 4-like isoform X16
100380485	11	78217189	78227486	+	0.595373	0.150408	0.00172568	Lipase member H precursor
100306802	6	76744683	76750257	-	0.78376	0.198	0.00172568	Cytosolic 5-nucleotidase 1A
106562547	11	34901228	34903220	+	0.757743	0.191457	0.00172896	deoxyuridine 5\'-triphosphate nucleotidohydrolase-like
106583104	22	26875625	26879740	+	0.593681	0.150038	0.00173426	adaptin ear-binding coat-associated protein 2-like isoform X1
100136433	1	92797698	92810970	+	0.615957	0.155696	0.00173841	polyunsaturated fatty acid elongase
100196482	15	20944152	20944424	+	1.2236	0.309471	0.00175415	budding uninhibited by benzimidazoles 1 beta
106604565	5	27055226	27124165	+	-0.824853	0.208764	0.00177319	E3 ubiquitin-protein ligase RNF130-like isoform X4
106563443	11	76483463	76484206	-	1.05317	0.26661	0.00177802	leucine-rich repeat neuronal protein 4-like
106605107	5	50172135	50183224	+	1.15805	0.293165	0.00177802	protein THEMIS2-like isoform X1
100194455	22	32681124	32682626	+	-0.707158	0.179027	0.00177802	homeobox protein HoxC8bb
106569469	14	35684004	35689378	+	0.963383	0.244033	0.00179363	uncharacterized protein LOC106569469
106563621	11	79010921	79016212	-	0.807837	0.204646	0.00179447	kinesin-like protein KIF20A
106561680	10	108506693	108512534	-	0.712509	0.18059	0.00180877	ETS domain-containing protein Elk-3-like
106591345	#N/A	#N/A	#N/A	#N/A	1.40914	0.357213	0.00181117	#N/A
100380618	15	68519231	68543439	-	0.869063	0.22034	0.00181472	EF-hand domain-containing protein D2
106560879	10	77254736	77264146	+	0.537799	0.136373	0.00181685	cirhin
100195599	22	51156817	51159816	-	0.560366	0.142101	0.00181685	ubiquitin-conjugating enzyme E2 C isoform X1
106588641	27	18506653	18520654	-	1.40293	0.35576	0.00181685	transcription factor HIVEP3-like isoform X2
106584201	23	12915228	12916643	+	0.750544	0.190359	0.00181976	forkhead box C1-A-like
106567989	1	136692490	136693784	+	0.674313	0.171092	0.00182918	cytochrome c oxidase subunit 5B, mitochondrial-like
106561019	10	70599080	70604548	-	-0.919078	0.233443	0.00185667	uncharacterized protein LOC106561019
106575023	16	86713877	86757389	-	0.782229	0.198685	0.00185667	progesterone-induced-blocking factor 1 isoform X2
106604248	5	9770804	9776526	+	1.06784	0.271247	0.00185743	sterol-4-alpha-carboxylate 3-dehydrogenase, decarboxylating-like
106610722	9	11418214	11428814	-	0.670117	0.170255	0.00186266	14-3-3 protein beta/alpha-1-like
106560694	10	59212268	59229397	+	0.76279	0.19389	0.00187532	junctional adhesion molecule A-like
106574678	16	75254825	75270505	+	0.65543	0.166605	0.00187532	actin-related protein 2/3 complex subunit 2-like
106569084	14	22764352	22783365	-	0.804894	0.204629	0.00187889	kinesin-like protein KIF2C isoform X2
100196558	3	55686268	55695554	+	0.603317	0.153392	0.00187969	RAD52 motif-containing protein 1
100136353	19	42266967	42274729	-	0.668947	0.170087	0.00188014	nucleoside diphosphate kinase
106574402	16	69985314	69992144	+	-0.746019	0.189736	0.00188749	motile sperm domain-containing protein 2-like isoform X1
106567318	13	29364653	29366153	-	1.08393	0.275817	0.00190122	tumor necrosis factor receptor superfamily member 6B
106582266	21	36098843	36130452	-	0.615356	0.156586	0.00190122	sperm-specific antigen 2 isoform X1
106572174	15	68306654	68309133	+	0.934159	0.237779	0.00190795	BTB/POZ domain-containing protein KCTD20-like
106567257	13	41733895	41735916	+	1.05308	0.268116	0.00191453	tumor necrosis factor receptor superfamily member 9-like isoform X2
106580112	20	13105804	13133828	-	0.676779	0.172356	0.00192175	DNA polymerase epsilon catalytic subunit A
106601962	3	87769748	87806823	-	0.71714	0.182811	0.00194854	polycomb protein suz12-A-like
106563756	11	83625003	83632150	+	0.682377	0.174014	0.00195923	putative monooxygenase p33MONOX isoform X1
100195529	11	37524497	37535560	+	0.712249	0.181662	0.00196332	regulator of cytokinesis 1 isoform X1
106601611	3	76208921	76223867	+	0.74964	0.191291	0.00197507	LIM domain-containing protein 2-like isoform X1
100195150	13	26786339	26792904	-	0.841977	0.215025	0.00199849	targeting protein for Xklp2 isoform X1
106603271	4	41068850	41131820	+	0.563464	0.143913	0.00200047	acetyl-CoA carboxylase 1 isoform X6
106585487	24	23934127	23937197	+	0.666872	0.170351	0.0020044	cytochrome c oxidase subunit 6A1, mitochondrial-like
106586797	25	40075394	40112172	-	0.569626	0.145543	0.00201049	mediator of RNA polymerase II transcription subunit 14-like
106569296	1	142522398	142524126	+	0.560799	0.143342	0.00202058	histone H2A.V
106598092	NW_012372595	115	3655	-	1.3922	0.355852	0.00202058	protein-glutamine gamma-glutamyltransferase 2-like
106584149	23	17653167	17654706	-	0.895999	0.229099	0.00202926	regulator of G-protein signaling 21-like isoform X1
106604275	5	10603055	10610289	+	1.03697	0.265295	0.00204563	uncharacterized protein LOC106604275
106581618	21	834182	898142	-	0.952038	0.243601	0.00204896	LIM domain only protein 7 isoform X4
106563565	11	77834331	77836349	-	0.783945	0.200618	0.00205013	carbonyl reductase
100306848	14	40924662	40933747	-	0.611147	0.156399	0.00205013	death-associated protein kinase 3
106591484	#N/A	#N/A	#N/A	#N/A	1.14218	0.292295	0.00205013	#N/A
106571910	15	60032212	60035382	-	0.681292	0.174364	0.00205144	dual specificity protein phosphatase 7-like
100194436	13	35660872	35662051	+	-0.943882	0.241609	0.00205569	homeobox protein HoxC6aa
106610175	8	12246393	12252560	+	0.868127	0.222283	0.00206426	transmembrane protein 154-like
106587944	26	41536148	41537243	-	0.64686	0.165691	0.00207574	very-long-chain (3R)-3-hydroxyacyl-CoA dehydratase-like
106609990	1	76577565	76580237	-	0.569094	0.145841	0.00208682	NHP2-like protein 1
106565501	12	50260341	50261437	-	0.696305	0.178443	0.00208682	peptidyl-prolyl cis-trans isomerase-like 1
106612863	1	91708845	91713537	-	0.608107	0.155876	0.00209197	rho GTPase-activating protein 19-like
106584244	2	35596973	35627288	-	1.1172	0.286424	0.00209682	discoidin, CUB and LCCL domain-containing protein 1-like isoform X3
106585174	24	7002561	7007778	-	1.03032	0.264287	0.00211323	lipid phosphate phosphohydrolase 1-like
106599828	3	31290291	31298042	-	-0.881792	0.226198	0.00211333	ankyrin repeat and SOCS box protein 10 isoform X1
106612839	9	112092435	112113124	+	1.04038	0.26708	0.00213788	TLC domain-containing protein 2-like
106570310	14	69313529	69314805	-	0.636907	0.16355	0.00214646	replication protein A 14 kDa subunit-like
100195899	24	30504611	30514647	-	0.730234	0.187636	0.00216604	osteoclast-stimulating factor 1 isoform X1
106600207	3	36175094	36178977	-	0.670653	0.172443	0.00218566	caspase-8-like
106573648	16	34601245	34606204	+	1.16374	0.299253	0.00218709	olfactomedin-4-like
106578955	19	45403735	45407095	-	0.674041	0.173427	0.0022045	phosphatidylcholine:ceramide cholinephosphotransferase 1-like
100196710	NW_012341938	9748	14621	-	0.792161	0.203819	0.0022045	Transmembrane emp24 domain-containing protein 1
106585576	24	20760284	20762234	+	1.08956	0.28035	0.00220461	centromere-associated protein E-like
106571804	15	53747095	53760821	+	-0.66017	0.169931	0.00221692	sialomucin core protein 24-like isoform X2
106609956	8	3345444	3371382	+	0.833262	0.214523	0.00222175	uncharacterized protein LOC106609956
100380798	3	51095525	51104356	-	0.740462	0.190673	0.00222821	fructose-bisphosphate aldolase A
106585752	2	42560785	42563337	+	1.14932	0.295992	0.00222981	nucleoplasmin-like protein ANO39
106597351	1	26670606	26678555	-	0.781345	0.201246	0.0022321	serine/threonine-protein kinase PLK4-like
106566600	1	129757390	129762328	+	1.14627	0.29525	0.00223233	complement component C7-like
106610941	9	26590311	26602508	-	-0.521059	0.134319	0.00225695	protein C9orf72-like isoform X2
106594282	NW_012352334	4633	9974	-	0.970609	0.250199	0.00225695	piggyBac transposable element-derived protein 4-like isoform X1
100380807	20	66359828	66364886	-	0.533418	0.13751	0.00225696	Stress 70 protein chaperone microsome-associated 60 kDa protein precursor
106582013	21	24841966	24880331	-	-0.626292	0.161505	0.00226594	SPRY domain-containing protein 7-like
106585998	2	41884900	41887158	-	0.716025	0.18469	0.00227234	ewing\'s tumor-associated antigen 1 homolog isoform X2
106607192	6	32644271	32652796	-	0.651507	0.16805	0.00227234	proteasome activator complex subunit 3-like
106562619	11	37128694	37191858	+	0.740443	0.191054	0.00228179	ras GTPase-activating-like protein IQGAP1
106583339	22	34462903	34468394	-	0.829199	0.213984	0.00228534	NGFI-A-binding protein 2-like isoform X2
106560486	10	42986053	42987803	+	0.699498	0.18053	0.0022869	proline-rich receptor-like protein kinase PERK9
106569807	14	49134784	49147816	-	0.510806	0.131835	0.0022869	serine/threonine-protein kinase OSR1-like
100196017	22	38321097	38325738	-	1.1742	0.303287	0.00231252	CD209 antigen-like protein D
106604553	5	23108725	23119664	+	1.07472	0.277606	0.00231288	SAM and SH3 domain-containing protein 3-like
106562109	11	18397136	18400146	+	-0.800367	0.206764	0.00231504	BTB/POZ domain-containing protein 10-like
106573921	16	43693197	43700681	+	0.944871	0.244116	0.00231504	uncharacterized protein LOC106573921
106590649	29	35646410	35675189	-	0.953682	0.246374	0.00231504	tissue factor-like
106570417	14	75789070	75811383	+	1.0498	0.271363	0.00232981	src-like-adapter
106577641	18	53545622	53554482	+	0.8849	0.228729	0.00232981	placenta-specific gene 8 protein-like isoform X1
106582836	22	12657658	12671969	+	1.05099	0.271668	0.00232981	myb-related protein B isoform X2
101448039	14	49448816	49451096	+	0.514582	0.133046	0.00233696	Mul1b protein
106575325	17	13103559	13162872	-	0.544538	0.14083	0.00234442	mitogen-activated protein kinase kinase kinase kinase 4-like isoform X14
106576724	18	11857202	11891657	+	1.00906	0.261037	0.00235132	synapse differentiation-inducing gene protein 1
106603795	4	67497823	67507258	+	1.00571	0.260177	0.00235132	sphingolipid delta(4)-desaturase/C4-hydroxylase DES2-like
106609220	7	35135099	35273831	-	0.938807	0.243045	0.00237559	dedicator of cytokinesis protein 4-like isoform X3
106568147	13	90230994	90235284	+	1.38425	0.358387	0.00237647	dual specificity protein phosphatase 4-like
100195820	5	53366644	53367241	-	1.41947	0.36754	0.00237705	Hepcidin-1 precursor
106582764	22	11047669	11061200	-	0.790025	0.204585	0.00238052	ephrin type-A receptor 2 isoform X1
106612333	9	90910356	90921334	-	1.30374	0.337703	0.00238885	phytanoyl-CoA dioxygenase domain-containing protein 1-like
106561998	1	113434443	113452374	-	1.37034	0.355076	0.00239758	thrombospondin-4-B-like
106581192	20	58049404	58055584	-	0.735802	0.190677	0.00239996	calfacilitin-like
106570104	14	52521578	52523408	-	1.4263	0.369658	0.00240255	protein S100-A1-like
106606876	6	24510917	24517090	+	-0.912656	0.236541	0.00240255	sesquipedalian-1-like isoform X1
106565198	12	43490365	43503880	-	0.631637	0.163728	0.00240585	WD repeat-containing protein 1-like
106603131	4	37251313	37255243	-	0.960553	0.248998	0.00240615	sororin-like
100195039	10	33270447	33280715	-	0.568361	0.147347	0.00240841	ubiquitin carboxyl-terminal hydrolase isozyme L5
106600599	3	42500123	42531598	-	-0.508873	0.131934	0.00240982	kinesin-1 heavy chain isoform X2
106583199	22	29187185	29192412	-	0.666258	0.172747	0.00241012	protein transport protein Sec61 subunit alpha isoform B-like
106612149	9	80213758	80215100	-	1.23606	0.320507	0.00241134	LOW QUALITY PROTEIN: U7 snRNA-associated Sm-like protein LSm11
106599183	3	11519067	11520308	-	-0.851006	0.220716	0.00241703	transcription factor HES-1-B-like
106599250	3	26864465	26933978	+	-1.01961	0.264462	0.00241703	5\'-AMP-activated protein kinase subunit gamma-1-like isoform X2
106592914	#N/A	#N/A	#N/A	#N/A	0.913893	0.237034	0.00241703	#N/A
106573832	#N/A	#N/A	#N/A	#N/A	0.688977	0.178701	0.00241703	#N/A
106578412	19	9358218	9366238	-	1.41089	0.366063	0.0024274	probable G-protein coupled receptor 141
106602766	4	20573947	20579563	+	0.510427	0.132449	0.00243075	mannosyl-oligosaccharide glucosidase-like
106562249	11	21577579	21607439	+	0.950496	0.246794	0.00245081	tyrosine-protein kinase Fes/Fps-like
106571937	15	61752550	61765293	+	0.922002	0.2394	0.00245081	RNA-binding protein 38-like
106586574	2	51279976	51288873	-	0.583528	0.151527	0.0024513	stromal membrane-associated protein 1-like
106564979	12	29127895	29131566	+	1.05373	0.273655	0.00245374	alpha-(1,3)-fucosyltransferase 9-like
106568497	13	99964566	100042236	-	-0.822405	0.213656	0.00246611	probable E3 ubiquitin-protein ligase HERC1
106578055	18	65503959	65506676	-	0.919155	0.23881	0.00246649	putative ferric-chelate reductase 1 isoform X1
106589507	28	12915807	12957406	+	0.614012	0.15953	0.00246649	ras-interacting protein 1-like isoform X3
106589759	28	25355936	25364853	+	0.534481	0.138881	0.00246782	phosphoglycerate mutase 1-like
100195769	6	74872056	74873168	-	0.918925	0.23877	0.00246782	fucosyltransferase 9
106582249	21	35495563	35510408	+	0.971227	0.252541	0.00249317	plastin-2
106594636	NW_012353241	6907	8035	-	1.04811	0.272601	0.0025017	tetraspanin-8-like
106584051	23	10984478	11011434	-	0.871038	0.226565	0.00250248	G-protein-signaling modulator 2-like isoform X3
100196500	25	21854615	21861616	+	0.64414	0.167585	0.00250932	PHS1 protein
106575928	17	29483758	29488515	+	1.18591	0.308553	0.00251002	Krueppel-like factor 12
106585580	#N/A	#N/A	#N/A	#N/A	0.851878	0.221685	0.00251594	#N/A
106563105	11	58118435	58119784	+	1.42561	0.371108	0.00252729	complement C1q-like protein 2
106590185	29	13936795	13970912	-	0.657825	0.171308	0.00254102	DNA topoisomerase 2-binding protein 1-A-like
106581119	20	61415660	61417813	+	0.690462	0.179858	0.00255086	non-histone chromosomal protein HMG-14-like
106591822	#N/A	#N/A	#N/A	#N/A	0.912356	0.237731	0.0025614	#N/A
106572092	15	72102603	72141942	+	0.672875	0.175368	0.00256583	inositol 1,4,5-trisphosphate receptor type 3-like
100380384	23	2709641	2735618	-	0.572247	0.14915	0.00256632	major vault protein
106610223	8	15110983	15121015	+	0.523411	0.136472	0.00257828	endothelin B receptor-like
106599719	3	28673494	28693680	+	0.7132	0.185981	0.00258202	desmoplakin-like
106591208	NW_012343559	41077	48769	-	1.39313	0.363301	0.00258233	intestinal mucin-like protein
106604281	5	11044104	11065877	-	0.606613	0.158204	0.00258375	clathrin interactor 1-like
106565535	12	58300351	58315462	+	0.692943	0.18073	0.00258464	peptidyl-prolyl cis-trans isomerase FKBP11-like
106590234	29	16867022	16901255	-	0.847339	0.221063	0.00259488	extracellular sulfatase Sulf-1 isoform X1
106584213	23	21940790	21953722	-	1.13217	0.295522	0.0026126	delta(24)-sterol reductase
106589227	28	6878018	6878809	+	0.984193	0.256943	0.00261452	cholesterol 25-hydroxylase-like protein
106607219	6	31958877	31969106	-	0.73973	0.193111	0.00261452	ribonucleoprotein PTB-binding 1-like isoform X2
106608165	6	75708674	75710274	-	0.5675	0.148158	0.00261452	prostaglandin E2 receptor EP2 subtype-like
106609243	7	34238852	34270246	+	0.523952	0.136791	0.00261452	myoD family inhibitor domain-containing protein-like
100196141	3	42582031	42592363	-	0.851027	0.2222	0.00261643	AP-1 complex subunit sigma-3
106579236	#N/A	#N/A	#N/A	#N/A	0.769382	0.201056	0.00264864	#N/A
106583609	1	21587237	21590220	+	1.34421	0.351317	0.00265194	uncharacterized protein LOC106583609
106587790	26	37245196	37247739	+	1.15765	0.302565	0.00265194	chondroitin sulfate synthase 1-like
106611422	9	45236974	45247266	-	1.10943	0.289987	0.00265401	histone-lysine N-methyltransferase NSD2-like
106575630	17	20602993	20619428	-	0.593937	0.155475	0.00271387	actin-related protein 2/3 complex subunit 2
106564197	12	5834637	5837027	-	0.790841	0.207057	0.00272003	ferritin, middle subunit-like
106562189	11	15480208	15482339	+	1.22427	0.320629	0.00273016	sulfotransferase family cytosolic 2B member 1-like
106606215	6	845434	848779	-	0.588671	0.154173	0.00273016	cytosolic endo-beta-N-acetylglucosaminidase-like
106608480	7	3135456	3171690	-	0.996462	0.261068	0.00274385	circularly permutated Ras protein 1-like isoform X1
106586549	2	51289729	51294813	-	0.909036	0.238299	0.00276354	centromere protein K-like
106601371	3	69071318	69072457	+	1.41527	0.370997	0.00276354	permeability factor 2-like
106583071	22	27768384	27770880	-	0.90562	0.237432	0.002767	interferon regulatory factor 6-like
106582711	22	8103916	8218461	-	-0.667329	0.175038	0.00278503	neuron navigator 1-like isoform X3
106596001	NW_012357916	4481	6816	-	0.920194	0.241407	0.00279131	serine/threonine-protein kinase haspin-like
106577164	18	26259521	26281579	-	0.775637	0.203579	0.00281002	nephrocystin-1-like isoform X3
106586346	25	20769815	20774050	-	0.623644	0.16373	0.00281697	dnaJ homolog subfamily B member 11-like
106607190	6	32680218	32680823	+	-0.5526	0.145124	0.00282904	ADP-ribosylation factor-like protein 4D
106563523	11	74515425	74521820	+	1.11088	0.291759	0.00283019	transcription factor PU.1-like isoform X1
106588965	2	52785542	52789098	+	1.17752	0.309346	0.00283949	uncharacterized protein LOC106588965 isoform X1
106583807	22	60061618	60062398	-	1.00379	0.263717	0.00283949	centromere protein P
106564678	12	20030875	20042015	-	1.02825	0.270202	0.0028471	phosphoinositide 3-kinase regulatory subunit 5-like isoform X1
106612654	9	103189105	103190676	-	1.04846	0.275665	0.00286984	uncharacterized protein LOC106612654
100196057	13	8035186	8057390	-	0.667775	0.175652	0.00288665	apoptosis regulator Bcl-X isoform X1
106613791	10	20751741	20752763	-	0.595189	0.156584	0.00289189	cyclin-dependent kinases regulatory subunit 1-like
106566166	12	84178983	84214253	-	1.00445	0.264286	0.00289404	nck-associated protein 1-like
106573581	16	38782954	38850615	+	0.888542	0.233802	0.00289477	protein strawberry notch homolog 2-like isoform X1
106563690	11	81439638	81444162	+	0.809508	0.213081	0.00290889	cytokine receptor common subunit gamma-like
106587655	1	23458108	23465539	+	0.82393	0.216948	0.00292012	thrombospondin-1-like
106605517	5	63536690	63550537	+	1.08504	0.285761	0.00292654	sodium- and chloride-dependent transporter XTRP3-like isoform X1
106590691	29	41108677	41112707	+	0.934154	0.246209	0.00295874	cysteine/serine-rich nuclear protein 2-like
106582705	22	7297955	7326939	-	-0.879413	0.231812	0.0029632	diphosphoinositol polyphosphate phosphohydrolase 1
106569355	14	32784677	32786846	+	-0.734613	0.193651	0.00296335	protein CYR61-like
100170848	27	27859726	27861503	-	-0.844486	0.222643	0.00296735	homeobox protein HoxA10ab
100195708	12	40532643	40564612	+	0.685857	0.180841	0.00297075	bridging integrator 2 isoform X1
106578317	2	13258975	13263265	-	1.24639	0.328662	0.00297229	uncharacterized protein LOC106578317 isoform X3
106562837	11	45292048	45344034	-	0.792026	0.208974	0.00299441	calcium-binding mitochondrial carrier protein SCaMC-2-like
100194441	15	88510678	88512483	-	-1.05657	0.278763	0.00299441	homeobox protein HoxC9ab
106605108	5	50164955	50171227	-	0.748237	0.19746	0.00300177	nuclear inhibitor of protein phosphatase 1-like
106579005	#N/A	#N/A	#N/A	#N/A	-0.694067	0.183182	0.00300452	#N/A
106570699	14	87887992	87896339	+	0.64395	0.17	0.00301495	transcription factor E2F3-like, partial
100195293	10	72216792	72267973	+	0.904239	0.238806	0.00303101	fibulin-1 precursor
106565994	12	76450095	76470111	+	0.681321	0.18004	0.00305656	ephrin type-A receptor 2-like isoform X2
106581359	20	70636971	70665415	-	0.742321	0.196188	0.00306162	phosphatidylinositol 4,5-bisphosphate 3-kinase catalytic subunit beta isoform-like
106564871	12	25736231	25903310	+	0.541295	0.143066	0.00306205	cytoplasmic phosphatidylinositol transfer protein 1-like isoform X2
106609281	7	39379924	39389498	-	0.51482	0.136078	0.00306364	protein MCM10 homolog isoform X2
106573828	16	40509005	40509808	-	1.08069	0.285683	0.00306752	tumor necrosis factor alpha-induced protein 8-like protein 1
106565229	12	41208861	41214861	-	0.749136	0.198054	0.00306995	keratin, type I cytoskeletal 18-like
100380500	29	105083	110386	+	1.09579	0.289801	0.00308348	Mitogen-activated protein kinase kinase kinase 8
106588216	#N/A	#N/A	#N/A	#N/A	0.969736	0.256468	0.00308348	#N/A
106599680	3	27490814	27634646	-	-0.618655	0.163624	0.00308364	zinc finger protein 521-like isoform X4
106604645	5	29698225	29702757	+	1.22614	0.324308	0.00308423	CD97 antigen-like
106583210	22	28781955	28793495	-	0.537255	0.142107	0.00308437	ruvB-like 1
106602383	4	11271782	11285203	+	0.88806	0.234938	0.00309079	centrosomal protein of 44 kDa-like
106564599	#N/A	#N/A	#N/A	#N/A	0.732122	0.193817	0.00311964	#N/A
106574198	16	56642549	56678236	+	0.883971	0.234061	0.00312703	bcl-2-related ovarian killer protein homolog A
100380613	5	59987117	60002186	-	1.2306	0.325902	0.00313388	Metalloreductase STEAP4
106564814	12	27847034	27886496	-	-0.633777	0.167861	0.00313499	egl nine homolog 1-like
106564483	12	13446408	13519731	+	-0.857907	0.227216	0.00313499	RNA-binding protein 20-like
106566804	13	27256098	27272239	-	0.866182	0.229443	0.00313899	tyrosine-protein kinase SRK3-like
106600712	3	50826246	50827424	-	1.07092	0.283714	0.00314392	uncharacterized protein LOC106600712
106566486	13	9270475	9327769	+	0.72826	0.192985	0.00315451	extracellular sulfatase Sulf-2-like
106608181	6	74843377	74844489	+	0.912524	0.241873	0.00316432	alpha-(1,3)-fucosyltransferase 9-like
106581291	2	22346968	22348746	-	1.10746	0.293593	0.00316748	CD83 antigen-like
106581001	20	54976148	54984246	-	0.831674	0.220477	0.00316748	inverted formin-2-like
100195920	6	38514024	38514353	-	1.36178	0.361216	0.0031908	reprimo-like protein
106567265	#N/A	#N/A	#N/A	#N/A	1.39184	0.369186	0.0031908	#N/A
106573536	16	27878830	27885532	-	1.19824	0.317887	0.00319658	fibronectin-like
106611449	9	46321821	46367756	+	0.581777	0.154353	0.00319817	ribose-5-phosphate isomerase-like
100195155	26	1602481	1616692	-	0.96764	0.256741	0.00319886	docking protein 2
106602319	1	36301865	36309697	-	-0.583916	0.15494	0.00320056	leucine-rich repeat-containing protein 57-like
106604103	5	1157252	1164191	-	0.942898	0.250293	0.00321621	vacuolar ATPase assembly integral membrane protein vma21-like
106592035	NW_012347555	107	2979	+	0.588471	0.156218	0.00321706	TNF receptor-associated factor 6-like, partial
106565748	12	71867373	71870821	-	-0.681332	0.180943	0.00323316	histone-lysine N-methyltransferase SETMAR-like
106573406	16	22629590	22631962	+	0.747549	0.198547	0.00323434	uncharacterized protein LOC106573406
106569428	14	34910183	34922527	-	-1.16109	0.308451	0.00323956	large neutral amino acids transporter small subunit 2
106589555	28	14772615	14802833	-	0.641048	0.170296	0.00323956	inactive rhomboid protein 1-like isoform X1
106606421	6	8421737	8424267	+	-0.676365	0.179686	0.00323956	uncharacterized protein LOC106606421
106580682	20	43592046	43700507	-	0.585573	0.155595	0.00324504	dedicator of cytokinesis protein 10-like isoform X4
100286565	9	34328252	34331531	-	0.606695	0.161202	0.00324504	serine palmitoyltransferase small subunit A
106562102	11	18564279	18596369	-	0.52936	0.140682	0.00325038	protein-methionine sulfoxide oxidase MICAL2-like isoform X3
106601894	3	85326938	85331571	+	0.620032	0.164785	0.00325038	jmjC domain-containing protein 8-like
106562501	#N/A	#N/A	#N/A	#N/A	0.605879	0.161025	0.00325038	#N/A
106588482	27	7980861	7989871	+	1.03652	0.275512	0.00325456	C-type lectin domain family 4 member E-like isoform X2
106593908	NW_012351292	3904	8202	+	1.01503	0.270049	0.00329643	cytohesin-4-like, partial
106580082	20	14363246	14376224	+	0.640379	0.170408	0.00330504	riboflavin kinase-like
106573647	16	34667600	34713088	+	0.864272	0.230049	0.00331497	E3 ubiquitin-protein ligase znrf1-like
106604910	5	38838399	38856720	+	0.647892	0.172518	0.00332994	mitogen-activated protein kinase 9-like isoform X2
106578772	19	35136130	35137704	+	0.721355	0.192105	0.00333475	pollen-specific leucine-rich repeat extensin-like protein 2
106612514	9	108148581	108156412	+	0.858156	0.22861	0.00334683	alpha-2-macroglobulin-like
106565720	12	74260026	74268580	-	1.01307	0.269947	0.00335443	myb-related protein B-like
100195186	15	93246722	93252388	-	0.69207	0.184428	0.00335658	Keratin, type II cytoskeletal 8
100380429	2	36874912	36879649	+	0.578367	0.154132	0.00335658	regulator of chromosome condensation
106560435	10	40136330	40144539	+	0.588489	0.156922	0.00338082	histone-binding protein N1/N2-like isoform X4
106585113	24	10517891	10520546	+	0.816697	0.217766	0.00338082	zinc finger protein 703-like
106584683	23	42445783	42466302	-	1.14481	0.305292	0.00338141	unconventional myosin-IXa-like, partial
106600917	3	53598478	53609523	-	0.561155	0.149644	0.00338141	uncharacterized protein LOC106600917 isoform X1
106569200	14	26062628	26064558	-	0.821724	0.219158	0.00338353	elongation of very long chain fatty acids protein 1-like
106576284	17	44817993	44828833	+	-0.577568	0.154045	0.00338353	integrin-alpha FG-GAP repeat-containing protein 2 isoform X2
100195947	23	13647924	13651229	-	1.28579	0.342935	0.00338353	E3 ubiquitin-protein ligase RNF138
106567866	13	78308677	78309748	-	1.10931	0.29593	0.00338886	interleukin-18-binding protein
106587077	2	48448692	48463765	+	0.878975	0.234483	0.00338886	phosphoinositide 3-kinase regulatory subunit 5-like
106607210	6	32109472	32124219	+	0.555352	0.148147	0.00338886	DNA (cytosine-5)-methyltransferase 1-like isoform X2
106582111	21	28818175	28824986	-	1.02658	0.273889	0.003392	chromatin assembly factor 1 subunit B-like
106591047	NW_012343379	1514	22950	+	0.568982	0.151835	0.00340103	kinesin-associated protein 3-like, partial
106588618	27	17631504	17633315	-	0.767802	0.204899	0.00340134	SH3 domain-binding glutamic acid-rich-like protein 3
106561360	10	97961856	97979806	+	-0.719248	0.191966	0.00340594	protein C12orf4 homolog isoform X3
106568722	14	8860343	8969769	+	0.914815	0.244275	0.00342582	cAMP-specific 3\',5\'-cyclic phosphodiesterase 4B-like isoform X1
106612120	9	77918773	77925816	+	1.03019	0.275101	0.00342745	stimulator of interferon genes protein
100195878	9	117328329	117360679	-	0.730151	0.194991	0.00342871	vasodilator-stimulated phosphoprotein
106565426	12	52822552	52825727	-	0.884667	0.23631	0.0034388	cathepsin Z-like
106595477	NW_012355873	169	4304	+	-0.826536	0.220795	0.00343992	acetylcholine receptor subunit alpha
106603095	4	35889399	35891586	+	0.575263	0.153678	0.00344006	WD repeat-containing protein 73-like
100380381	1	41513641	41514522	+	1.20272	0.321333	0.0034403	Syntaxin-11
100136484	5	23308352	23323616	+	0.836475	0.223474	0.0034403	glutathione S-transferase P
106605468	5	58801599	58819859	-	0.64853	0.17327	0.0034403	tropomyosin alpha-3 chain-like isoform X8
106587296	26	13428881	13433556	-	0.568715	0.151967	0.00344563	UPF0547 protein C16orf87 homolog
106585023	24	14779003	14790148	+	1.04257	0.278666	0.00345699	thrombospondin-4-B-like
106600572	3	43758969	43834371	+	0.807454	0.21586	0.00346397	calmodulin-regulated spectrin-associated protein 2-like isoform X2
106570814	15	707003	778788	-	0.534692	0.142948	0.00346441	metal transporter CNNM4-like
100196877	15	32069157	32070814	-	1.18281	0.316369	0.00348721	Fatty acid-binding protein, brain
100195195	20	22417142	22422555	+	0.95042	0.254222	0.00348722	Sodium-dependent phosphate transporter 1-A
106604257	5	9559242	9560037	-	0.520723	0.139305	0.00349309	rho-related GTP-binding protein RhoG-like
106602030	3	90561279	90564362	+	1.05465	0.282312	0.00352038	toll-like receptor 13
106583240	22	28034372	28049623	-	0.515624	0.138049	0.00352809	myosin light polypeptide 6 isoform X1
106606064	5	76190993	76214532	-	0.78523	0.210241	0.00352877	diacylglycerol O-acyltransferase 1-like, partial
106601517	1	30685361	30763388	+	0.576997	0.15454	0.00353914	uncharacterized protein C15orf41 homolog
106603672	4	59015500	59020024	+	0.541275	0.144971	0.00353914	vacuolar protein sorting-associated protein 26B
106612499	1	9714874	9738596	-	0.838512	0.224666	0.00355662	transcription factor E2F2-like
106608748	7	18057857	18061024	-	1.07559	0.288197	0.00355673	high affinity immunoglobulin epsilon receptor subunit gamma-like isoform X2
106588788	27	24323602	24325110	-	1.043	0.279549	0.00357066	uncharacterized protein LOC106588788
106589835	28	28559876	28576936	+	0.50807	0.136181	0.00357101	CDP-diacylglycerol--glycerol-3-phosphate 3-phosphatidyltransferase, mitochondrial-like isoform X1
100380710	1	12083325	12092238	-	0.544983	0.146095	0.00357446	origin recognition complex subunit 3
106591226	NW_012343581	2924	7995	+	0.8398	0.225119	0.00357446	uncharacterized protein LOC106591226
106609244	7	34080139	34085276	-	-0.897762	0.240771	0.00359481	uncharacterized protein LOC106609244
106582694	22	6830994	6853274	-	-0.61548	0.165104	0.00360441	rho guanine nucleotide exchange factor 3-like isoform X5
106576740	18	11107872	11199532	-	-0.722372	0.19381	0.00360761	E3 ubiquitin-protein ligase parkin
106599666	1	28453511	28458850	-	0.579067	0.155379	0.00361165	DNA helicase MCM8
106565967	12	75503696	75505294	+	0.782351	0.209988	0.00362576	transmembrane protein 51-like
106592457	2	63452386	63461192	+	0.985595	0.264657	0.0036457	serine/threonine-protein kinase 10-like isoform X1
106602392	4	10608670	10614877	-	0.815897	0.219082	0.0036457	transmembrane protein 154-like isoform X2
106565715	12	74400598	74422399	-	0.644475	0.173102	0.00365755	inhibitor of nuclear factor kappa-B kinase subunit epsilon-like
106608192	6	75319123	75321282	+	1.30537	0.35066	0.00366249	fos-related antigen 2-like
106604368	5	16052003	16053351	+	0.517358	0.139106	0.00370903	probable palmitoyltransferase ZDHHC24
100195035	3	56110210	56132324	+	1.04225	0.280258	0.00371018	abl interactor 1 isoform X3
106570537	14	80545107	80590584	+	0.727299	0.195689	0.00373718	inactive phospholipase C-like protein 2 isoform X1
106588466	27	8029364	8037834	-	1.10906	0.298499	0.00375227	asialoglycoprotein receptor 1-like
106602865	4	28550115	28555192	+	1.03388	0.278304	0.00375795	tripartite motif-containing protein 16-like
106568716	1	139654442	139680784	+	1.13646	0.306061	0.0037824	microtubule-associated protein 1B-like
106577908	2	13441789	13444464	-	0.85594	0.230543	0.00378733	IGF-like family receptor 1 isoform X1
106601135	3	61251209	61268599	+	0.863845	0.232749	0.00380187	formin-like protein 1
106573242	16	10384194	10393086	-	-0.618422	0.166673	0.00381636	RING finger protein 141
100380550	18	15541223	15555427	-	0.542921	0.146341	0.00382071	sialin isoform X1
106566982	13	32428279	32446150	-	1.11428	0.300522	0.00384623	carbohydrate sulfotransferase 11-like
106585538	24	21936042	21948913	-	0.947183	0.25546	0.00384623	angiopoietin-related protein 2-like
106587780	26	36614530	36615865	-	0.53174	0.143406	0.00384623	GDP-fucose transporter 1-like isoform X2
106581381	20	71991760	72519579	-	1.06263	0.286676	0.00385784	roundabout homolog 2-like isoform X8
106574886	#N/A	#N/A	#N/A	#N/A	-1.22553	0.330715	0.00387153	#N/A
106590431	2	57204552	57215283	+	1.20992	0.326524	0.00387332	beta-1,3-galactosyltransferase 2-like
106580940	2	23657906	23658633	+	0.784769	0.21184	0.00388532	tumor necrosis factor, alpha-induced protein 8-like protein 2 B
106579446	19	67308769	67320439	-	1.12308	0.303179	0.00388607	V-type proton ATPase catalytic subunit A-like
106574712	#N/A	#N/A	#N/A	#N/A	1.13909	0.307547	0.00389277	#N/A
106604942	5	40743378	40751331	+	0.600462	0.162176	0.00391025	protein Spindly
106561597	10	105009781	105019533	+	0.643024	0.173757	0.00393649	proton myo-inositol cotransporter-like isoform X2
106574206	16	56948564	56989432	+	0.909374	0.245835	0.0039589	tumor protein 63 isoform X1
100196178	1	22282278	22296184	-	-0.74923	0.202618	0.00397731	apoptosis regulatory protein Siva
100195372	14	12787947	12792946	-	0.537547	0.145374	0.00397731	calponin-2
106578238	18	70501557	70502237	+	0.818424	0.221371	0.00397838	2-acylglycerol O-acyltransferase 2-A-like
106577993	18	63208734	63212727	+	0.789037	0.213419	0.00397838	uncharacterized protein LOC106577993
106591602	#N/A	#N/A	#N/A	#N/A	-0.578934	0.156589	0.00397838	#N/A
106574288	16	64345215	64354742	+	0.607968	0.164476	0.00398556	major facilitator superfamily domain-containing protein 6-A-like isoform X3
106578256	2	14075381	14085205	+	1.17555	0.31809	0.00399504	B-cell receptor CD22-like isoform X1
106610854	9	19636439	19637062	-	0.849277	0.229823	0.00399779	cdc42 effector protein 2-like
106606324	1	55748488	55755052	-	-0.521305	0.141094	0.00400517	RING finger protein 24-like isoform X2
106577403	18	37495083	37511735	+	0.712283	0.1928	0.00400642	sphingomyelin phosphodiesterase 3-like
106598790	3	10593260	10598792	-	0.516445	0.139791	0.00400642	sentrin-specific protease 5-like isoform X2
106560963	10	74483218	74490782	-	0.558502	0.151208	0.00401312	cell wall protein DAN4-like
106575286	17	11906579	11908174	+	-0.637177	0.172498	0.00401312	transcription elongation factor A N-terminal and central domain-containing protein
106604740	5	33148629	33208563	+	0.633339	0.171513	0.00402591	phospholipid-transporting ATPase 11C-like isoform X2
106565620	12	61072852	61074401	-	0.52258	0.141533	0.00402963	small nuclear ribonucleoprotein E
106568979	14	11578048	11587082	+	0.967039	0.26193	0.00403255	metal-response element-binding transcription factor 2-like isoform X3
106590309	29	17521211	17525349	+	-1.26139	0.341756	0.0040477	uncharacterized protein LOC106590309
106561813	10	113497070	113549150	-	0.982245	0.266175	0.00405432	plakophilin-3 isoform X3
106566786	13	28263293	28270567	+	-0.744092	0.201635	0.00405432	E3 ubiquitin-protein ligase ARIH2-like isoform X2
106605929	#N/A	#N/A	#N/A	#N/A	1.17971	0.319709	0.00405651	#N/A
106565039	12	32709698	32710453	-	-1.18443	0.321036	0.00406165	transmembrane protein 74B-like
106589294	28	1576559	1701114	+	0.653513	0.177134	0.00406165	unconventional myosin-Id-like
106574462	16	70372436	70383393	-	1.03502	0.280601	0.00407201	probable phospholipid-transporting ATPase IH, partial
106608984	7	24651133	24664005	-	0.683593	0.185338	0.00407384	uncharacterized protein LOC106608984 isoform X4
106575420	2	8158657	8188830	-	0.592255	0.160624	0.00408789	tuftelin-like isoform X1
106611642	9	60085927	60129587	+	1.03679	0.281213	0.00409164	ATP-binding cassette sub-family A member 1-like
106605211	5	54352257	54387560	+	-0.693962	0.188266	0.0041024	isoprenoid synthase domain-containing protein isoform X1
106587336	2	47371613	47455464	+	0.832054	0.225835	0.00412812	rab11 family-interacting protein 4A-like isoform X2
106611295	9	39271336	39279295	-	-0.506297	0.13743	0.00413112	coiled-coil domain-containing protein 28A
100286683	3	50240152	50245061	+	-0.615461	0.167097	0.00413971	protein lin-7 homolog B
106564498	12	14145663	14152415	+	0.884896	0.240275	0.00414395	AP-1 complex subunit mu-2-like
106577323	18	34324919	34325497	-	0.733522	0.199303	0.00417719	N-acetyllactosaminide beta-1,3-N-acetylglucosaminyltransferase 2-like, partial
106580283	1	21024867	21034323	+	-0.541213	0.147058	0.0041779	BSD domain-containing protein 1-like
106610754	9	13780062	13798723	-	-0.639498	0.17378	0.00418113	transcription regulator protein BACH2-like
106613922	10	26353440	26376390	+	0.700493	0.190432	0.0042013	protein ECT2 isoform X2
106610432	8	21404170	21411107	-	1.19539	0.325025	0.00420704	C-type lectin domain family 4 member F-like
106561002	10	71521971	71528904	-	0.885277	0.240781	0.00422395	mixed lineage kinase domain-like protein
106567502	13	52815365	52857371	+	0.585032	0.159186	0.00424534	septin-8-A
106572797	15	94383981	94391689	-	-0.655715	0.178589	0.00429978	uncharacterized protein LOC106572797 isoform X1
106571895	15	59323129	59326019	+	0.618197	0.168407	0.00431095	androgen-dependent TFPI-regulating protein-like isoform X2
106605186	5	53128482	53129522	+	1.36495	0.371936	0.00432538	free fatty acid receptor 2-like
100136375	13	7163826	7174074	-	1.06021	0.288934	0.00432824	tyrosine-protein kinase HCK
106576414	2	9835539	9895616	-	1.24877	0.340327	0.00432824	POU domain, class 2, transcription factor 2-like isoform X10
106605462	5	58931363	58933220	+	0.843057	0.229759	0.00432824	transmembrane protein 79-like
106609466	7	42441274	42442044	+	-1.07909	0.294137	0.00433737	bcl-2-like protein 13
106602821	4	25172216	25189125	+	0.868846	0.236839	0.00433747	Krueppel-like factor 5
106575663	#N/A	#N/A	#N/A	#N/A	1.24996	0.340752	0.00434007	#N/A
106611136	9	27130162	27132384	-	1.00407	0.273739	0.00434221	ornithine decarboxylase 1-like
106568392	13	95509682	95516023	+	0.761286	0.207586	0.00434856	ras-GEF domain-containing family member 1B-B-like
106569647	14	42523304	42527603	+	-0.672091	0.18327	0.00434856	transcription termination factor 4, mitochondrial
106577851	18	59373795	59379276	+	1.09922	0.299847	0.0043683	uncharacterized protein LOC106577851
100195393	21	2340941	2341987	-	0.995915	0.271706	0.00437278	N-arachidonyl glycine receptor
106561608	1	110665140	110743142	-	0.97673	0.266609	0.00439145	SH2 domain-containing protein 3C-like isoform X2
100195841	10	63440274	63444106	-	0.549022	0.149857	0.00439145	peptidyl-prolyl cis-trans isomerase B
106564845	12	26709285	26712747	+	0.72562	0.198064	0.00439145	ewing\'s tumor-associated antigen 1 homolog
106580834	2	23876497	23878702	+	1.33688	0.364924	0.00439145	protein S100-A1-like isoform X1
106591207	NW_012343559	31391	37666	-	1.22099	0.333344	0.0043971	intestinal mucin-like protein
106594412	NW_012352661	1350	7005	+	-0.788788	0.215405	0.00441177	F-box only protein 7-like
106569736	14	45818326	45819516	+	-0.713503	0.195139	0.0044984	uncharacterized protein LOC106569736 isoform X2
106602747	4	22675407	22770461	-	-0.525676	0.143769	0.0044984	transmembrane protein 131-like isoform X5
106571077	15	17524151	17524264	-	0.611729	0.167408	0.00453399	dolichyl-diphosphooligosaccharide--protein glycosyltransferase subunit 4
106570209	14	63285043	63289902	-	0.908112	0.248556	0.00454067	lanosterol 14-alpha demethylase-like
100196751	2	10270049	10279196	-	0.520129	0.142429	0.00456502	Tumor necrosis factor receptor superfamily member 1A precursor
106581813	21	14301378	14414341	+	0.671048	0.183764	0.00456595	plakophilin-4 isoform X7
106610270	8	16767987	16778166	-	0.854379	0.234019	0.00457692	uncharacterized protein LOC106610270 isoform X1
106583297	#N/A	#N/A	#N/A	#N/A	-0.816427	0.223663	0.0045846	#N/A
106609456	7	41889250	41901170	+	1.24269	0.340483	0.00459063	mitogen-activated protein kinase 11-like
106602914	4	31541054	31555049	-	0.93203	0.255389	0.0045943	uncharacterized protein LOC106602914 isoform X2
106597035	NW_012363199	7	2481	-	1.22213	0.334927	0.00460126	latent-transforming growth factor beta-binding protein 1-like, partial
106566685	13	22101982	22188668	+	1.03928	0.284846	0.00460138	voltage-dependent L-type calcium channel subunit alpha-1D-like isoform X2
106585928	24	43700279	43813183	-	0.779048	0.213522	0.00460138	anthrax toxin receptor 2-like
106607858	6	60829372	60864973	+	0.770313	0.211114	0.00460138	sodium-dependent multivitamin transporter-like isoform X1
106578756	19	34107885	34118951	-	1.09844	0.301188	0.00461986	calpain-2 catalytic subunit-like
106602291	4	6702777	6730186	-	0.717372	0.196698	0.00461986	bifunctional 3\'-phosphoadenosine 5\'-phosphosulfate synthase 1-like
106603210	#N/A	#N/A	#N/A	#N/A	-0.650415	0.178332	0.00461986	#N/A
106596922	NW_012362619	994	1559	+	1.17261	0.321572	0.00462693	protein PML-like
106564816	1	121467103	121485954	+	-0.852665	0.233929	0.00464846	solute carrier family 35 member E4-like isoform X1
106587436	26	21810762	21815749	+	1.16021	0.318308	0.00464846	meiosis-specific nuclear structural protein 1-like
100195257	12	26409344	26424971	+	-0.768745	0.210939	0.00465607	UTP--glucose-1-phosphate uridylyltransferase isoform X1
106577103	18	25151217	25153748	-	0.751918	0.206393	0.00467638	F-box only protein 5-like
106576685	18	13180709	13182310	+	0.873096	0.239664	0.00467658	uncharacterized protein LOC106576685
100846960	10	37450983	37457478	-	0.663583	0.182178	0.00468357	leukocyte elastase inhibitor isoform X1
106579399	19	61681023	61726993	-	0.573826	0.15755	0.0046871	kinesin-like protein KIF22
106608979	7	24357991	24368908	-	0.829203	0.227828	0.00473198	E3 ubiquitin-protein ligase TRIM39-like
106589959	28	36169443	36322056	+	0.590699	0.162309	0.00473412	calpain-2 catalytic subunit-like
106606778	6	21091841	21095005	+	1.21506	0.333907	0.00473985	aldehyde dehydrogenase family 3 member B1-like
106580518	20	34827417	34847310	-	1.03514	0.284526	0.00475256	zinc metalloproteinase-disintegrin-like brevilysin H2a
106572678	15	90180239	90238283	+	0.875192	0.240655	0.0047715	receptor tyrosine-protein kinase erbB-3-like isoform X2
106591107	NW_012343438	49712	50914	+	-1.05527	0.290162	0.0047715	kelch-like protein 38
106560265	10	30638552	30649851	-	-0.665299	0.18295	0.00477305	ubiquitin carboxyl-terminal hydrolase 46-like
106564654	12	20995116	21001092	-	0.936354	0.257572	0.00479283	ATPase family AAA domain-containing protein 5-like isoform X4
106561917	11	7747077	7753588	-	0.716405	0.197085	0.004796	oxidoreductase HTATIP2-like
100380796	10	513897	514670	-	0.513687	0.14135	0.00480717	cytoplasmic FMR1-interacting protein 1 homolog
100286706	27	38112344	38114061	-	0.727635	0.200219	0.00480717	MARCKS-related protein
106592562	NW_012348413	9717	14167	+	0.556171	0.153105	0.00482918	gastrula zinc finger protein XlCGF7.1-like
106609889	8	566840	573189	+	1.00145	0.275707	0.00483254	sialic acid synthase-like
106612161	9	80698445	80700639	+	0.554774	0.152776	0.00484697	26S proteasome non-ATPase regulatory subunit 10-like isoform X2
106563040	11	57647984	57657520	+	-0.633907	0.174595	0.00485514	tubulin-specific chaperone A-like
106583117	22	26069431	26130501	-	-0.784227	0.216048	0.00486667	solute carrier family 41 member 1-like
100286611	5	56365997	56370247	+	0.854881	0.235554	0.00487167	Ras-related protein RABA2a
106560470	10	42281710	42282609	-	0.795756	0.219278	0.00487212	tyrosine-protein kinase transmembrane receptor ROR1-like
106607445	6	43393723	43402723	-	0.988331	0.272346	0.00487212	GTPase IMAP family member 8-like
106560403	10	38654142	38659302	+	-0.523418	0.144327	0.00491196	UPF0598 protein C8orf82 homolog isoform X2
106592044	NW_012347565	5593	22365	-	0.96421	0.265893	0.00491525	lisH domain and HEAT repeat-containing protein KIAA1468 homolog
106583386	2	30930222	30937331	+	0.806127	0.222346	0.00492489	cell division cycle-associated protein 3-like
106583412	22	43730997	43751381	-	0.530235	0.146257	0.00492606	receptor-type tyrosine-protein phosphatase alpha-like isoform X1
106569899	14	60998896	61010132	+	0.54041	0.149118	0.0049467	uncharacterized protein LOC106569899
106562274	11	22077896	22079951	-	0.815123	0.224931	0.00494728	cytochrome b-245 light chain-like
106565814	12	68863612	68896312	-	-0.56625	0.156292	0.00495588	6-phosphofructo-2-kinase/fructose-2,6-bisphosphatase 4-like isoform X1
106608944	7	23037515	23045131	+	0.857744	0.236759	0.00495588	uncharacterized protein LOC106608944
106590830	NW_012342006	1421	9160	-	0.918822	0.253621	0.00495588	von Willebrand factor A domain-containing protein 7-like
106561842	10	114818790	114819728	-	1.15806	0.319744	0.00496633	kinesin-like protein KIF23
100195318	12	57951241	57960548	+	0.548293	0.151388	0.00496633	RuvB-like 1
106611594	9	57395883	57398390	+	0.56584	0.156241	0.00496786	UPF0544 protein C5orf45 homolog isoform X1
106580303	20	28094042	28109566	+	0.84237	0.232653	0.00498222	sodium/potassium/calcium exchanger 6, mitochondrial isoform X1
106582107	21	28954377	28956533	+	0.696884	0.192498	0.00498954	sodium/myo-inositol cotransporter-like
106562580	11	35784455	35786942	-	1.06699	0.294744	0.00499009	TNF receptor-associated factor 6-like
106589467	28	11306517	11323838	+	0.728928	0.20142	0.0050093	tripartite motif-containing protein 65-like
100136908	1	147535510	147613374	-	0.687068	0.189873	0.00501421	Na/K/2Cl co-transporter
106570933	15	7450427	7453423	-	0.566635	0.156612	0.00502096	activated RNA polymerase II transcriptional coactivator p15-like
106608271	6	81630347	81631765	-	0.78139	0.216013	0.0050334	rho-related GTP-binding protein RhoV-like
106610748	9	13462022	13495541	+	-0.678939	0.187786	0.00506455	frizzled-3-like isoform X1
100380467	3	36129544	36138985	+	0.860574	0.238048	0.00506898	Zygotic DNA replication licensing factor mcm6-B
106608276	6	81940004	81947012	+	0.853345	0.236133	0.00508253	DNA replication licensing factor MCM3-like, partial
106610996	9	24369460	24380700	-	0.816759	0.225996	0.00508253	serine/threonine-protein kinase PLK4-like isoform X1
106581851	21	11849869	11861128	+	1.03411	0.28621	0.00509405	lanosterol synthase
106600711	3	50819756	50821075	-	0.800025	0.221442	0.00509564	uncharacterized protein LOC106600711
106575203	2	7517397	7529312	+	0.940001	0.260202	0.00509745	CD27 antigen-like isoform X3
106588962	27	32729976	32747569	+	0.878626	0.243271	0.00511213	ATP-dependent DNA helicase Q4
100380367	11	57416759	57438247	+	0.590613	0.163557	0.00512031	Arylsulfatase B precursor
106568448	13	96713588	96713926	-	0.587831	0.162782	0.00512031	notch-regulated ankyrin repeat-containing protein A-like
106578833	19	38609841	38612433	+	-0.539659	0.149462	0.00512283	C-factor-like
106602652	4	18923256	18926062	-	1.34296	0.371969	0.00512582	mucin-5AC-like
106588385	27	10588044	10593066	+	0.780232	0.216137	0.00513335	histone H3-like centromeric protein A
106589508	2	54240948	54247293	-	0.615266	0.170452	0.00513677	choline transporter-like protein 2
100380692	7	18156510	18269791	-	0.788776	0.218578	0.00514818	dedicator of cytokinesis protein 11 isoform X3
106595416	NW_012355635	1986	7193	-	0.945767	0.262075	0.00514818	uncharacterized protein LOC106595416
100194965	23	32462895	32470856	-	0.524145	0.14529	0.00516733	elongation factor 2 isoform X1
106604870	1	50165137	50234275	+	-0.746945	0.207151	0.00519581	cytoplasmic polyadenylation element-binding protein 3-like isoform X5
106560611	10	49521166	49596341	-	0.788451	0.218715	0.00520381	heparan sulfate 2-O-sulfotransferase 1-like
106590172	29	13366954	13375487	+	-0.782465	0.217046	0.00520381	ATP-binding cassette sub-family F member 2
106613068	9	121820365	121852264	-	1.0529	0.292073	0.00520381	uncharacterized protein LOC106613068
106577961	18	62696095	62818252	+	-1.14841	0.318616	0.00521183	butyrophilin subfamily 1 member A1-like isoform X3
106564684	1	120997258	121024093	+	0.746889	0.207318	0.00523749	rab11 family-interacting protein 1-like isoform X1
106609235	7	34669116	34674190	-	0.751077	0.208534	0.00525373	suppressor APC domain-containing protein 1-like
106594455	NW_012352786	8034	9191	-	1.21478	0.337331	0.00525968	putative DNA helicase ino80
106602937	4	32639518	32643758	-	0.774343	0.215054	0.00526436	arylsulfatase I-like
106561747	10	111749881	111754006	+	-0.674777	0.187421	0.00526917	WASP homolog-associated protein with actin, membranes and microtubules-like
106583937	23	2549263	2595396	-	0.645383	0.179269	0.00527165	protein spinster homolog 1-like isoform X1
106587452	26	23862177	23863543	+	0.796106	0.221197	0.005288	uncharacterized protein C16orf46 homolog
106608835	7	20321892	20335179	+	1.12994	0.313955	0.005288	Y+L amino acid transporter 2-like
106567270	13	42397756	42400361	-	-0.673077	0.187033	0.00528998	uncharacterized protein At5g50100, mitochondrial-like
106568625	14	1382067	1383754	-	-0.788887	0.219208	0.00528998	myc proto-oncogene protein
106591908	NW_012347389	24586	26729	-	0.886482	0.246359	0.00529487	piggyBac transposable element-derived protein 4-like
106604384	5	15731219	15742644	-	0.504662	0.140272	0.00530472	EH domain-containing protein 1-like
106567290	13	43398872	43400736	-	-0.739125	0.205551	0.00533625	uncharacterized protein C3orf18 homolog
106611760	9	63209748	63215446	-	0.689021	0.191632	0.00533959	atlastin-3-like isoform X2
106604875	5	35892561	36020475	-	0.578311	0.160904	0.00536617	protein diaphanous homolog 1 isoform X1
106600685	3	49837165	49839177	+	-0.5182	0.1442	0.00536914	transmembrane protein 11, mitochondrial isoform X1
106595758	NW_012356903	1625	7761	-	-0.820678	0.228361	0.00536914	tuberin-like
106613070	9	121814208	121818395	-	0.595098	0.165638	0.00537966	heat shock 70 kDa protein 13-like
106605277	5	55615517	55617946	+	0.726868	0.20238	0.00539845	G-protein-signaling modulator 2-like
106604761	5	34408025	34408513	-	-0.817451	0.227649	0.00541193	mid1-interacting protein 1-like
106605522	5	63714040	63733946	+	1.03741	0.288952	0.00542176	CUB domain-containing protein 1-like isoform X1
106565430	1	124371096	124380160	+	0.973957	0.271361	0.00543934	gelsolin-like
106560449	10	40518602	40650953	-	-0.518607	0.144513	0.00544508	N(G),N(G)-dimethylarginine dimethylaminohydrolase 1
106575179	17	8451723	8474553	-	0.703367	0.195995	0.00544508	protein Shroom2-like isoform X1
106566906	13	23012260	23020406	+	-0.957113	0.266723	0.00544739	protein-glutamine gamma-glutamyltransferase 2-like
106561227	10	86214900	86216418	+	1.33492	0.372052	0.00545372	uncharacterized protein LOC106561227
106570575	14	83492448	83501961	-	-0.610157	0.170094	0.00546845	ataxin-1-like
106565780	12	70737407	70742140	+	0.567733	0.15828	0.00546936	protein FAM83D-like
100194820	19	40832173	40847211	-	0.904421	0.252177	0.00547609	unc-13 homolog D isoform X1
106580418	20	29610115	29612112	+	0.928089	0.258797	0.00547685	proteinase-activated receptor 1-like
106585784	24	32624080	32637742	-	1.06798	0.297795	0.00547685	TNF receptor-associated factor 1-like
106607497	6	40404680	40407893	-	-0.5633	0.157123	0.00549445	male-specific lethal 1-like 1
100286405	NW_012350364	1883	8351	+	1.12908	0.314975	0.00549879	SH3 and PX domain-containing protein 2A
106601205	3	64804608	64806545	+	0.795348	0.221889	0.00550083	epithelial membrane protein 2-like
106596090	3	592451	602189	+	-0.502394	0.140221	0.00552656	tripartite motif-containing protein 47-like isoform X1
106608653	7	12629633	12642468	-	0.702922	0.196188	0.00552656	coronin-1B-like
100195222	13	60250593	60269749	-	0.807502	0.225477	0.00555442	Sugar phosphate exchanger 2
106570155	14	61921994	61922923	+	1.3241	0.369715	0.00555442	leukotriene B4 receptor 1-like
106611522	9	51779744	51780700	-	0.629647	0.175832	0.0055591	C1GALT1-specific chaperone 1-like
106581848	21	12082751	12084654	+	-0.820031	0.229055	0.00557598	uncharacterized protein LOC106581848
106589614	28	16424524	16442086	+	0.97328	0.27188	0.00557864	monocarboxylate transporter 4 isoform X2
106577503	18	45107907	45123662	+	0.681536	0.1904	0.00558307	arylsulfatase J-like
106598550	NW_012380297	339	2889	+	1.24741	0.348646	0.00560954	protein-glutamine gamma-glutamyltransferase 2-like, partial
106591588	NW_012344686	12915	27915	-	0.98536	0.275411	0.00560954	regulator of G-protein signaling 20-like isoform X2
106579127	19	57493754	57495302	-	1.00426	0.280814	0.00563496	endonuclease domain-containing 1 protein-like
106613418	10	539039	548863	+	0.702078	0.19634	0.00564109	cytoplasmic FMR1-interacting protein 2-like, partial
106588456	27	8433441	8434484	-	1.29675	0.362702	0.00565113	C3a anaphylatoxin chemotactic receptor-like
100194920	6	64013422	64019280	+	0.622132	0.17402	0.00565113	Acetyl-CoA acetyltransferase, cytosolic
106607423	6	43930379	43956002	+	0.506453	0.141666	0.00565113	manganese-transporting ATPase 13A1-like isoform X3
106589598	28	16143617	16152391	+	-0.668348	0.187089	0.00570369	arylsulfatase G isoform X3
106563153	11	61738974	61782430	-	0.551127	0.154306	0.00571664	sarcoplasmic/endoplasmic reticulum calcium ATPase 2
106570011	14	57550853	57556078	+	1.30372	0.365269	0.00576779	sialoadhesin-like isoform X2
106565032	12	32079721	32104702	-	0.543992	0.152422	0.00576956	copine-3-like isoform X1
106605575	1	55434326	55435703	+	-0.534903	0.149941	0.00579902	N(4)-(Beta-N-acetylglucosaminyl)-L-asparaginase-like
106604135	5	4122702	4155860	-	0.594528	0.166661	0.00579902	mothers against decapentaplegic homolog 5-like
106586674	25	35604767	35610069	+	-0.776441	0.217749	0.00582276	inhibitor of growth protein 1-like isoform X1
106595080	#N/A	#N/A	#N/A	#N/A	-0.783231	0.219648	0.00582276	#N/A
100196662	20	44104400	44108948	+	0.641806	0.180057	0.00584356	serine (or cysteine) proteinase inhibitor clade E, nexin, plasminogen activator inhibitor type 1-like precursor
100195973	22	40833360	40834733	+	-0.626718	0.175822	0.00584356	CF089 protein
106571348	1	149070903	149074995	-	0.817234	0.2293	0.00585014	elongation of very long chain fatty acids protein 7-like
100136447	5	49725367	49727336	+	0.937636	0.263099	0.00585014	C type lectin receptor B isoform X1
100136352	3	92391112	92393690	+	0.573311	0.160882	0.00585342	actin, cytoplasmic 1 isoform X1
106609625	7	49710547	49721610	-	1.13954	0.319854	0.00586872	ras and EF-hand domain-containing protein homolog isoform X1
106572115	15	71428185	71429564	-	0.842446	0.236477	0.00586927	protein FAM110B-like
106567371	13	45187922	45189216	+	-0.873092	0.245114	0.00587539	transcription factor HES-4-B-like
100194609	4	35428937	35436255	-	-0.93176	0.261646	0.00589143	pyruvate dehydrogenase kinase 3
106563925	11	91874191	91901605	-	1.08914	0.30589	0.00589793	thrombospondin type-1 domain-containing protein 1 isoform X2
106585825	24	38368388	38371399	+	0.512129	0.143831	0.00589793	RNA-binding E3 ubiquitin-protein ligase MEX3C
106564225	12	6668207	6677847	+	0.546116	0.153424	0.00591242	NACHT, LRR and PYD domains-containing protein 3-like
106607025	6	30221222	30229391	-	0.788104	0.221419	0.00591374	transforming growth factor beta receptor type 3-like isoform X2
106573069	16	3806421	3812991	-	-0.960349	0.269885	0.00592767	L-lactate dehydrogenase B-A chain isoform X1
100194950	21	29345846	29352176	+	1.07406	0.301869	0.00593232	kelch-like protein 6
106584365	23	29272213	29273763	-	-0.951578	0.267575	0.00596882	diencephalon/mesencephalon homeobox protein 1-like
106572757	1	158030490	158037750	+	0.789526	0.222038	0.00597756	dnaJ homolog subfamily C member 25-like
106607850	6	60383368	60406958	-	0.561446	0.157925	0.00599002	CAD protein-like isoform X3
106605546	5	64327229	64333005	+	1.24215	0.349713	0.00605864	squalene monooxygenase-like
106572252	15	64595040	64612236	+	0.724094	0.203871	0.00606026	tyrosine-protein kinase Srms-like
106568215	13	86628407	86629318	-	0.633608	0.178423	0.00607059	transmembrane protein 119-like isoform X2
106561001	10	71578616	71595329	-	0.67162	0.189167	0.00608526	uncharacterized protein LOC106561001 isoform X2
106589985	28	37948022	37974342	-	1.00558	0.28324	0.00608566	calpain-2 catalytic subunit-like, partial
106560981	10	73153488	73164203	+	0.826715	0.233004	0.00612805	gamma-parvin
106603816	4	68448007	68455170	+	0.557114	0.157023	0.00612805	serine/threonine-protein phosphatase 2A catalytic subunit alpha isoform-like
106586851	25	44482716	44493114	+	0.55405	0.156225	0.00616023	tRNA (guanine-N(7)-)-methyltransferase non-catalytic subunit WDR4
106593072	1	25093786	25098534	-	-0.694577	0.195867	0.00616481	maleylacetoacetate isomerase isoform X2
106600998	3	59585804	59600994	-	0.819677	0.231154	0.00616558	integrin beta-3-like
106610181	8	12754942	12768689	+	1.08698	0.306558	0.00616904	protein bangles and beads-like
106610431	8	21414067	21423951	-	1.07372	0.302897	0.00618303	C-type lectin domain family 4 member E-like
106575107	17	3760582	3769198	-	0.764905	0.215807	0.00619013	N-acetyllactosaminide beta-1,3-N-acetylglucosaminyltransferase 4-like
106563771	11	84263605	84267540	-	0.607213	0.171352	0.006199	uncharacterized protein LOC106563771
106600924	3	53429796	53449984	-	0.509466	0.143768	0.006199	syntaxin-binding protein 2-like
106591441	NW_012344029	3767	29496	-	0.520009	0.146734	0.006199	serine/threonine-protein kinase ATR
106568398	13	95358530	95374203	+	0.994611	0.280711	0.00620551	follistatin-A-like isoform X2
[truncated: 2,357 more rows]

## Sheet: Enrichment
	Supplementary file 2. GO term and KEGG pathway enrichment for differentially expressed genes between healthy and lice-attachment skin
	UP-REGULATED							DOWN-REGULATED
	ID	Term	Category	FDR	Input number	Fold enrichment		ID	Term	Category	FDR	Input number	Fold enrichment
	GO:0034080	CENP-A containing nucleosome assembly	Biological process	1.30381e-11	21	6.68212		GO:0033596	TSC1-TSC2 complex	Cellular component	7.28852e-07	9	19.628
	GO:0070062	extracellular exosome	Cellular component	1.52722e-10	584	1.22361		GO:0004842	ubiquitin-protein transferase activity	Molecular function	5.64559e-05	60	2.13031
	GO:0030174	regulation of DNA-dependent DNA replication initiation	Biological process	2.32265e-10	17	7.35557		GO:0045792	negative regulation of cell size	Biological process	9.99456e-05	10	9.14599
	GO:0042555	MCM complex	Cellular component	5.23374e-10	15	8.11214		ko04910	Insulin signaling pathway	KEGG pathway	0.000108464	32	2.8667
	ko04110	Cell cycle	KEGG pathway	1.08786e-09	70	2.77138		GO:0006995	cellular response to nitrogen starvation	Biological process	0.000233639	7	14.1747
	ko03030	DNA replication	KEGG pathway	2.72664e-09	30	5.49579		GO:0032007	negative regulation of TOR signaling	Biological process	0.00091086	14	4.84139
	GO:0030496	midbody	Cellular component	3.89319e-09	72	2.14414		GO:0000045	autophagosome assembly	Biological process	0.00112375	20	3.3173
	GO:0005925	focal adhesion	Cellular component	3.46123e-08	154	1.54767		GO:0052845	inositol-5-diphosphate-1,2,3,4,6-pentakisphosphate diphosphatase activity	Molecular function	0.00112375	5	17.7171
	ko04111	Cell cycle - yeast	KEGG pathway	8.00675e-08	42	3.33788		GO:1901911	adenosine 5'-(hexahydrogen pentaphosphate) catabolic process	Biological process	0.00112375	5	17.7171
	GO:0034663	endoplasmic reticulum chaperone complex	Cellular component	4.2211e-07	11	7.93065		GO:0052843	inositol-1-diphosphate-2,3,4,5,6-pentakisphosphate diphosphatase activity	Molecular function	0.00112375	5	17.7171
	GO:0034314	Arp2/3 complex-mediated actin nucleation	Biological process	5.16187e-07	27	3.32013		GO:0034431	bis(5'-adenosyl)-hexaphosphatase activity	Molecular function	0.00112375	5	17.7171
	GO:0000722	telomere maintenance via recombination	Biological process	8.52471e-07	18	4.52823		GO:0000298	endopolyphosphatase activity	Molecular function	0.00112375	5	17.7171
	GO:0003688	DNA replication origin binding	Molecular function	9.73841e-07	10	8.31854		GO:0052848	inositol-3,5-bisdiphosphate-2,3,4,6-tetrakisphosphate 5-diphosphatase activity	Molecular function	0.00112375	5	17.7171
	GO:0009052	pentose-phosphate shunt, non-oxidative branch	Biological process	2.19562e-06	9	8.84757		GO:0052840	inositol diphosphate tetrakisphosphate diphosphatase activity	Molecular function	0.00112375	5	17.7171
	GO:0051233	spindle midzone	Cellular component	3.92381e-06	22	3.50029		GO:0052846	inositol-1,5-bisdiphosphate-2,3,4,6-tetrakisphosphate 1-diphosphatase activity	Molecular function	0.00112375	5	17.7171
	GO:0070938	contractile ring	Cellular component	5.17815e-06	17	4.27649		GO:0008486	diphosphoinositol-polyphosphate diphosphatase activity	Molecular function	0.00112375	5	17.7171
	GO:0000922	spindle pole	Cellular component	8.20314e-06	42	2.24015		GO:0052844	inositol-3-diphosphate-1,2,4,5,6-pentakisphosphate diphosphatase activity	Molecular function	0.00112375	5	17.7171
	ko05133	Pertussis	KEGG pathway	8.75846e-06	39	2.84815		GO:0034432	bis(5'-adenosyl)-pentaphosphatase activity	Molecular function	0.00112375	5	17.7171
	ko04060	Cytokine-cytokine receptor interaction	KEGG pathway	1.22718e-05	69	2.04323		GO:1901909	diadenosine hexaphosphate catabolic process	Biological process	0.00112375	5	17.7171
	ko04145	Phagosome	KEGG pathway	1.22718e-05	58	2.20735		GO:1901907	diadenosine pentaphosphate catabolic process	Biological process	0.00112375	5	17.7171
	ko04640	Hematopoietic cell lineage	KEGG pathway	1.22718e-05	35	2.93251		GO:0052847	inositol-1,5-bisdiphosphate-2,3,4,6-tetrakisphosphate 5-diphosphatase activity	Molecular function	0.00112375	5	17.7171
	GO:0048029	monosaccharide binding	Molecular function	1.67363e-05	26	2.87081		GO:0080008	Cul4-RING E3 ubiquitin ligase complex	Cellular component	0.00128066	11	5.47175
	GO:0005885	Arp2/3 protein complex	Cellular component	1.8914e-05	13	5.02141		GO:0000715	nucleotide-excision repair, DNA damage recognition	Biological process	0.00218461	10	5.67052
	GO:0038096	Fc-gamma receptor signaling pathway involved in phagocytosis	Biological process	3.38807e-05	42	2.11512		GO:0042787	protein ubiquitination involved in ubiquitin-dependent protein catabolic process	Biological process	0.00311557	35	2.16393
	GO:0018149	peptide cross-linking	Biological process	4.89604e-05	14	4.32631		GO:0005978	glycogen biosynthetic process	Biological process	0.0035232	15	3.63561
	GO:0032467	positive regulation of cytokinesis	Biological process	5.52531e-05	24	2.82259		GO:0019228	neuronal action potential	Biological process	0.00363333	9	5.93404
	GO:0006002	fructose 6-phosphate metabolic process	Biological process	5.52531e-05	11	5.40726		GO:0000421	autophagosome membrane	Cellular component	0.00372587	10	5.25048
	GO:0006268	DNA unwinding involved in DNA replication	Biological process	5.52531e-05	11	5.40726		GO:0005536	glucose binding	Molecular function	0.00397829	6	10.0053
	GO:0051015	actin filament binding	Molecular function	7.68292e-05	57	1.80034		GO:0030017	sarcomere	Cellular component	0.00615371	38	2.00092
	GO:0034709	methylosome	Cellular component	7.68292e-05	12	4.80664		GO:0005980	glycogen catabolic process	Biological process	0.00629738	10	4.88838
	GO:0036310	annealing helicase activity	Molecular function	7.68292e-05	9	6.48822		ko04120	Ubiquitin mediated proteolysis	KEGG pathway	0.00643284	27	2.43384
	GO:0051256	mitotic spindle midzone assembly	Biological process	7.68292e-05	9	6.48822		GO:0032310	prostaglandin secretion	Biological process	0.00655975	7	7.34987
	GO:0000076	DNA replication checkpoint	Biological process	9.10459e-05	10	5.69164		GO:0004373	glycogen (starch) synthase activity	Molecular function	0.00894944	3	28.3454
	GO:0044548	S100 protein binding	Molecular function	9.30859e-05	14	4.09245		GO:0061547	glycogen synthase activity, transferring glucose-1-phosphate	Molecular function	0.00894944	3	28.3454
	GO:0000796	condensin complex	Cellular component	9.87469e-05	8	7.20885		ko00500	Starch and sucrose metabolism	KEGG pathway	0.0119608	10	4.66705
	GO:0000733	DNA strand renaturation	Biological process	9.87469e-05	8	7.20885		GO:0031625	ubiquitin protein ligase binding	Molecular function	0.0130742	41	1.85609
	GO:0097149	centralspindlin complex	Cellular component	9.90703e-05	7	8.41		GO:0014059	regulation of dopamine secretion	Biological process	0.0141485	5	10.1241
	GO:0004896	cytokine receptor activity	Molecular function	0.000107436	21	2.95055		GO:0050072	m7G(5')pppN diphosphatase activity	Molecular function	0.0141485	5	10.1241
	ko00030	Pentose phosphate pathway	KEGG pathway	0.00013539	20	3.86014		GO:0007050	cell cycle arrest	Biological process	0.0160685	35	1.94753
	GO:0005999	xylulose biosynthetic process	Biological process	0.000216344	6	9.26781		GO:0071797	LUBAC complex	Cellular component	0.0163735	4	14.1732
	GO:0070652	HAUS complex	Cellular component	0.000216344	6	9.26781		GO:0098902	regulation of membrane depolarization during action potential	Biological process	0.0229397	6	7.08711
	GO:0005876	spindle microtubule	Cellular component	0.000245066	24	2.57107		GO:0008626	granzyme-mediated apoptotic signaling pathway	Biological process	0.0261705	5	8.85857
	GO:0043142	single-stranded DNA-dependent ATPase activity	Molecular function	0.000249231	9	5.7249		GO:0019320	hexose catabolic process	Biological process	0.0261705	11	3.66929
	GO:0030864	cortical actin cytoskeleton	Cellular component	0.000272986	35	2.09313		GO:0032892	positive regulation of organic acid transport	Biological process	0.0272043	6	6.80363
	ko05219	Bladder cancer	KEGG pathway	0.000359901	27	2.83326		GO:0042220	response to cocaine	Biological process	0.0332334	8	4.72509
	GO:0006048	UDP-N-acetylglucosamine biosynthetic process	Biological process	0.000398691	8	6.17902		GO:0003886	DNA (cytosine-5-)-methyltransferase activity	Molecular function	0.0332334	5	8.33748
	ko05144	Malaria	KEGG pathway	0.000416901	23	3.10741		GO:0043130	ubiquitin binding	Molecular function	0.0354528	18	2.51475
	ko04113	Meiosis - yeast	KEGG pathway	0.000453016	26	2.81018		ko04152	AMPK signaling pathway	KEGG pathway	0.0420694	23	2.20371
	ko04621	NOD-like receptor signaling pathway	KEGG pathway	0.000453016	31	2.51925		GO:0000422	mitophagy	Biological process	0.0437123	28	1.98598
	ko05140	Leishmaniasis	KEGG pathway	0.000453016	31	2.50045		GO:0071286	cellular response to magnesium ion	Biological process	0.0449375	6	6.07467
	ko00100	Steroid biosynthesis	KEGG pathway	0.000453016	13	5.01818
	GO:0090023	positive regulation of neutrophil chemotaxis	Biological process	0.000486359	18	2.95021
	GO:0002102	podosome	Cellular component	0.000496715	17	3.06482
	ko04115	p53 signaling pathway	KEGG pathway	0.000547129	32	2.41866
	ko04670	Leukocyte transendothelial migration	KEGG pathway	0.000556984	52	1.93139
	GO:0032010	phagolysosome	Cellular component	0.000664829	6	8.10934
	GO:0032133	chromosome passenger complex	Cellular component	0.000664829	6	8.10934
	GO:0000942	condensed nuclear chromosome outer kinetochore	Cellular component	0.000664829	6	8.10934
	GO:0005200	structural constituent of cytoskeleton	Molecular function	0.000722109	35	1.99398
	GO:0043020	NADPH oxidase complex	Cellular component	0.000723722	8	5.76708
	GO:0061621	canonical glycolysis	Biological process	0.000739849	15	3.24485
	ko00520	Amino sugar and nucleotide sugar metabolism	KEGG pathway	0.00077649	22	2.93561
	GO:0001533	cornified envelope	Cellular component	0.000860758	10	4.50588
	GO:0000086	G2/M transition of mitotic cell cycle	Biological process	0.000878182	49	1.72861
	GO:0045132	meiotic chromosome segregation	Biological process	0.000931423	15	3.18123
	GO:0050839	cell adhesion molecule binding	Molecular function	0.000949708	81	1.47867
	ko05130	Pathogenic Escherichia coli infection	KEGG pathway	0.000970595	28	2.48061
	ko05200	Pathways in cancer	KEGG pathway	0.00100907	126	1.45653
	GO:0051549	positive regulation of keratinocyte migration	Biological process	0.00112298	7	6.3075
	GO:0003810	protein-glutamine gamma-glutamyltransferase activity	Molecular function	0.0011928	8	5.40664
	GO:0034501	protein localization to kinetochore	Biological process	0.0011928	8	5.40664
	GO:0022617	extracellular matrix disassembly	Biological process	0.00122381	32	2.01363
	ko05134	Legionellosis	KEGG pathway	0.00125471	28	2.42108
	GO:0000083	regulation of transcription involved in G1/S transition of mitotic cell cycle	Biological process	0.00139134	14	3.22172
	GO:0002502	peptide antigen assembly with MHC class I protein complex	Biological process	0.00151351	5	9.01003
	GO:0046602	regulation of mitotic centrosome separation	Biological process	0.00152326	6	7.2083
	GO:0090537	CERF complex	Cellular component	0.00152326	6	7.2083
	GO:0016860	intramolecular oxidoreductase activity	Molecular function	0.00158747	20	2.51587
	ko04380	Osteoclast differentiation	KEGG pathway	0.00196532	48	1.85287
	ko00480	Glutathione metabolism	KEGG pathway	0.00196532	19	2.9337
	GO:2000249	regulation of actin cytoskeleton reorganization	Biological process	0.00203805	18	2.63127
	GO:0033628	regulation of cell adhesion mediated by integrin	Biological process	0.00212409	19	2.53752
	GO:0031143	pseudopodium	Cellular component	0.00213103	13	3.26976
	GO:0042035	regulation of cytokine biosynthetic process	Biological process	0.00216181	21	2.3915
	GO:0005884	actin filament	Cellular component	0.00227387	38	1.81224
	ko05132	Salmonella infection	KEGG pathway	0.0023022	34	2.09991
	GO:1900026	positive regulation of substrate adhesion-dependent cell spreading	Biological process	0.00252051	20	2.43107
	GO:0001891	phagocytic cup	Cellular component	0.00254774	12	3.41524
	ko01200	Carbon metabolism	KEGG pathway	0.00257241	41	1.92671
	ko04141	Protein processing in endoplasmic reticulum	KEGG pathway	0.00257241	61	1.68192
	GO:0042470	melanosome	Cellular component	0.0026256	39	1.78152
	GO:0072562	blood microparticle	Cellular component	0.00274305	25	2.14689
	GO:0007265	Ras protein signal transduction	Biological process	0.00278167	85	1.40955
	GO:0000254	C-4 methylsterol oxidase activity	Molecular function	0.00281646	4	10.8116
	GO:0072573	tolerance induction to lipopolysaccharide	Biological process	0.00281646	4	10.8116
	GO:0005658	alpha DNA polymerase:primase complex	Cellular component	0.00281646	4	10.8116
	ko05222	Small cell lung cancer	KEGG pathway	0.00292372	39	1.94252
	GO:0010569	regulation of double-strand break repair via homologous recombination	Biological process	0.00323786	9	4.23145
	GO:0006335	DNA replication-dependent nucleosome assembly	Biological process	0.003304	7	5.40643
	GO:0008284	positive regulation of cell proliferation	Biological process	0.0034987	148	1.25406
	GO:0006695	cholesterol biosynthetic process	Biological process	0.00358885	17	2.58999
	GO:0007062	sister chromatid cohesion	Biological process	0.0036289	38	1.76557
	GO:0045454	cell redox homeostasis	Biological process	0.00363166	21	2.29487
	GO:0033622	integrin activation	Biological process	0.00367837	11	3.49882
	GO:0015949	nucleobase-containing small molecule interconversion	Biological process	0.00367837	11	3.49882
	GO:0009897	external side of plasma membrane	Cellular component	0.00375399	29	1.96149
	GO:0005094	Rho GDP-dissociation inhibitor activity	Molecular function	0.0039298	5	7.72288
	GO:0070615	nucleosome-dependent ATPase activity	Molecular function	0.0039298	5	7.72288
	GO:0032405	MutLalpha complex binding	Molecular function	0.0039298	5	7.72288
	GO:0005664	nuclear origin of replication recognition complex	Cellular component	0.0039298	5	7.72288
	GO:1904659	glucose transmembrane transport	Biological process	0.0039298	5	7.72288
	GO:0005814	centriole	Cellular component	0.00394745	24	2.12851
	GO:0045814	negative regulation of gene expression, epigenetic	Biological process	0.00404167	29	1.9493
	GO:0008250	oligosaccharyltransferase complex	Cellular component	0.00412818	8	4.55296
	GO:0019371	cyclooxygenase pathway	Biological process	0.00430522	9	4.05513
	ko05152	Tuberculosis	KEGG pathway	0.00444496	54	1.69666
	GO:0005524	ATP binding	Molecular function	0.0044705	227	1.17088
	ko04064	NF-kappa B signaling pathway	KEGG pathway	0.00447104	33	2.01512
	GO:0019897	extrinsic component of plasma membrane	Cellular component	0.00453921	47	1.62097
	GO:0005790	smooth endoplasmic reticulum	Cellular component	0.00486245	18	2.43392
	ko05131	Shigellosis	KEGG pathway	0.00513348	33	1.99261
	GO:0086073	bundle of His cell-Purkinje myocyte adhesion involved in cell communication	Biological process	0.00549962	6	5.8977
	GO:0002675	positive regulation of acute inflammatory response	Biological process	0.00549962	6	5.8977
	GO:0000281	mitotic cytokinesis	Biological process	0.00564962	22	2.16382
	ko05150	Staphylococcus aureus infection	KEGG pathway	0.00648396	15	2.94774
	ko05161	Hepatitis B	KEGG pathway	0.00648396	52	1.67273
	ko04666	Fc gamma R-mediated phagocytosis	KEGG pathway	0.00648396	40	1.81653
	ko00590	Arachidonic acid metabolism	KEGG pathway	0.00709699	19	2.50438
	ko04620	Toll-like receptor signaling pathway	KEGG pathway	0.00764186	33	1.91762
	ko04914	Progesterone-mediated oocyte maturation	KEGG pathway	0.00764186	34	1.89425
	ko05142	Chagas disease (American trypanosomiasis)	KEGG pathway	0.00764186	40	1.78651
	GO:1904237	positive regulation of substrate-dependent cell migration, cell attachment to substrate	Biological process	0.00792993	7	4.73063
	GO:0046599	regulation of centriole replication	Biological process	0.00807415	9	3.7432
	GO:0050510	N-acetylgalactosaminyl-proteoglycan 3-beta-glucuronosyltransferase activity	Molecular function	0.00852928	5	6.75752
	ko03430	Mismatch repair	KEGG pathway	0.00897481	11	3.49683
	ko04810	Regulation of actin cytoskeleton	KEGG pathway	0.00912741	71	1.5047
	GO:0008574	ATP-dependent microtubule motor activity, plus-end-directed	Molecular function	0.00949989	11	3.13052
	GO:0005509	calcium ion binding	Molecular function	0.00976092	93	1.32404
	GO:0034097	response to cytokine	Biological process	0.00982441	134	1.24019
	GO:0030216	keratinocyte differentiation	Biological process	0.0103363	27	1.88498
	GO:0034975	protein folding in endoplasmic reticulum	Biological process	0.0103691	9	3.60456
	GO:0048387	negative regulation of retinoic acid receptor signaling pathway	Biological process	0.0112651	7	4.45236
	GO:0007127	meiosis I	Biological process	0.0112651	16	2.40369
	GO:0008608	attachment of spindle microtubules to kinetochore	Biological process	0.0112651	11	3.05025
	GO:0007186	G-protein coupled receptor signaling pathway	Biological process	0.0120244	109	1.27502
	GO:0002443	leukocyte mediated immunity	Biological process	0.0120244	42	1.59561
	GO:0004198	calcium-dependent cysteine-type endopeptidase activity	Molecular function	0.0131326	12	2.82129
	GO:0006298	mismatch repair	Biological process	0.0131326	12	2.82129
	GO:0097038	perinuclear endoplasmic reticulum	Cellular component	0.0133692	9	3.47583
	ko04610	Complement and coagulation cascades	KEGG pathway	0.0142641	24	2.05874
	ko04668	TNF signaling pathway	KEGG pathway	0.0142641	40	1.70883
	GO:0005683	U7 snRNP	Cellular component	0.0143623	6	4.99036
	GO:0032677	regulation of interleukin-8 production	Biological process	0.0148993	16	2.33872
	GO:0002934	desmosome organization	Biological process	0.0152304	8	3.76114
	GO:0042824	MHC class I peptide loading complex	Cellular component	0.0153731	5	6.00669
	GO:0061502	early endosome to recycling endosome transport	Biological process	0.0153731	5	6.00669
	ko04622	RIG-I-like receptor signaling pathway	KEGG pathway	0.0165636	24	2.02657
	GO:0071168	protein localization to chromatin	Biological process	0.0171432	9	3.35597
	GO:0042276	error-prone translesion synthesis	Biological process	0.0171432	9	3.35597
	GO:0043209	myelin sheath	Cellular component	0.0175172	50	1.48773
	GO:0005903	brush border	Cellular component	0.0176941	26	1.83882
	GO:0016324	apical plasma membrane	Cellular component	0.0176941	49	1.49489
	GO:1903727	positive regulation of phospholipid metabolic process	Biological process	0.0180626	22	1.96711
	ko01230	Biosynthesis of amino acids	KEGG pathway	0.0192775	28	1.87972
	GO:0005577	fibrinogen complex	Cellular component	0.0201666	8	3.60443
	GO:0005788	endoplasmic reticulum lumen	Cellular component	0.0204199	46	1.5095
	GO:0030316	osteoclast differentiation	Biological process	0.0212516	20	2.0221
	GO:0043138	3'-5' DNA helicase activity	Molecular function	0.0212516	6	4.63391
	GO:0005662	DNA replication factor A complex	Cellular component	0.0212628	9	3.24411
	GO:0045120	pronucleus	Cellular component	0.0212628	9	3.24411
	GO:0048531	beta-1,3-galactosyltransferase activity	Molecular function	0.0212628	9	3.24411
	GO:0002020	protease binding	Molecular function	0.0212628	30	1.71784
	GO:0005687	U4 snRNP	Cellular component	0.0216349	7	3.98369
	GO:0001968	fibronectin binding	Molecular function	0.0216921	12	2.64856
	GO:0004715	non-membrane spanning protein tyrosine kinase activity	Molecular function	0.0218006	18	2.11645
	GO:0016266	O-glycan processing	Biological process	0.0230151	17	2.1634
	GO:0002576	platelet degranulation	Biological process	0.0232912	27	1.77074
	GO:0007094	mitotic spindle assembly checkpoint	Biological process	0.0236109	11	2.76651
	GO:0071801	regulation of podosome assembly	Biological process	0.0236109	11	2.76651
	GO:0031571	mitotic G1 DNA damage checkpoint	Biological process	0.0238181	26	1.79197
	GO:0043066	negative regulation of apoptotic process	Biological process	0.0243822	153	1.18324
	GO:0032466	negative regulation of cytokinesis	Biological process	0.0249031	5	5.40602
	GO:1902969	mitotic DNA replication	Biological process	0.0249031	5	5.40602
	GO:0043987	histone H3-S10 phosphorylation	Biological process	0.0249031	5	5.40602
	GO:0051082	unfolded protein binding	Molecular function	0.0249607	27	1.76007
	GO:0006297	nucleotide-excision repair, DNA gap filling	Biological process	0.0250732	10	2.92273
	GO:0051310	metaphase plate congression	Biological process	0.0255189	17	2.13825
	GO:0000784	nuclear chromosome, telomeric region	Cellular component	0.025724	26	1.78063
	GO:0001965	G-protein alpha-subunit binding	Molecular function	0.0258024	9	3.13946
	GO:0030027	lamellipodium	Cellular component	0.0258024	60	1.39206
	GO:0006749	glutathione metabolic process	Biological process	0.0286113	15	2.25337
	ko04114	Oocyte meiosis	KEGG pathway	0.0286316	32	1.73803
	GO:0043652	engulfment of apoptotic cell	Biological process	0.0286524	7	3.7845
	ko04210	Apoptosis	KEGG pathway	0.0292205	47	1.5535
	ko00512	Mucin type O-Glycan biosynthesis	KEGG pathway	0.0292205	13	2.55471
	GO:0004579	dolichyl-diphosphooligosaccharide-protein glycotransferase activity	Molecular function	0.0299392	6	4.32498
	GO:0001819	positive regulation of cytokine production	Biological process	0.0299392	76	1.31622
	GO:0035987	endodermal cell differentiation	Biological process	0.0302908	23	1.84332
	GO:0042802	identical protein binding	Molecular function	0.0307717	266	1.10575
	GO:0050863	regulation of T cell activation	Biological process	0.0312621	47	1.4626
	GO:0019901	protein kinase binding	Molecular function	0.031878	134	1.19539
	GO:0005677	chromatin silencing complex	Cellular component	0.0319081	8	3.32716
	ko00010	Glycolysis / Gluconeogenesis	KEGG pathway	0.0330555	22	1.94905
	GO:0050766	positive regulation of phagocytosis	Biological process	0.0332127	18	2.02827
	GO:0048365	Rac GTPase binding	Molecular function	0.0335186	22	1.85953
	ko00601	Glycosphingolipid biosynthesis - lacto and neolacto series	KEGG pathway	0.0361591	13	2.46507
	GO:0031093	platelet alpha granule lumen	Cellular component	0.0367519	15	2.19247
	GO:0007260	tyrosine phosphorylation of STAT protein	Biological process	0.0367519	15	2.19247
	GO:0051383	kinetochore organization	Biological process	0.0379002	7	3.60429
	GO:0033631	cell-cell adhesion mediated by integrin	Biological process	0.0379002	7	3.60429
	GO:0035437	maintenance of protein localization in endoplasmic reticulum	Biological process	0.0379002	7	3.60429
	ko05230	Central carbon metabolism in cancer	KEGG pathway	0.0379914	27	1.77943
	GO:0048013	ephrin receptor signaling pathway	Biological process	0.0385427	35	1.56552
	GO:0002504	antigen processing and presentation of peptide or polysaccharide antigen via MHC class II	Biological process	0.0385427	29	1.66052
	GO:1902966	positive regulation of protein localization to early endosome	Biological process	0.0385427	5	4.91456
	GO:0010757	negative regulation of plasminogen activation	Biological process	0.0385427	5	4.91456
	GO:2001202	negative regulation of transforming growth factor-beta secretion	Biological process	0.0385427	5	4.91456
	GO:0031213	RSF complex	Cellular component	0.0385427	5	4.91456
	GO:0000103	sulfate assimilation	Biological process	0.0385427	5	4.91456
	GO:0061087	positive regulation of histone H3-K27 methylation	Biological process	0.0385427	5	4.91456
	GO:0055056	D-glucose transmembrane transporter activity	Molecular function	0.0385427	5	4.91456
	GO:0010759	positive regulation of macrophage chemotaxis	Biological process	0.0385427	5	4.91456
	ko04512	ECM-receptor interaction	KEGG pathway	0.0389756	29	1.73173
	GO:0002274	myeloid leukocyte activation	Biological process	0.0390749	30	1.63976
	GO:1903825	organic acid transmembrane transport	Biological process	0.0390749	27	1.69867
	GO:0004953	icosanoid receptor activity	Molecular function	0.0395835	8	3.20393
	GO:0071287	cellular response to manganese ion	Biological process	0.0404686	6	4.05467
	GO:0032667	regulation of interleukin-23 production	Biological process	0.0404686	6	4.05467
	GO:0007256	activation of JNKK activity	Biological process	0.0404686	6	4.05467
	GO:0046351	disaccharide biosynthetic process	Biological process	0.0404686	6	4.05467
	GO:0016857	racemase and epimerase activity, acting on carbohydrates and derivatives	Molecular function	0.0404686	6	4.05467
	GO:0005911	cell-cell junction	Cellular component	0.0418212	115	1.20992
	GO:0071526	semaphorin-plexin signaling pathway	Biological process	0.044222	19	1.92093
	GO:0048247	lymphocyte chemotaxis	Biological process	0.0445766	11	2.53106
	GO:0051127	positive regulation of actin nucleation	Biological process	0.0445766	11	2.53106
	GO:0001890	placenta development	Biological process	0.0458139	28	1.65576
	GO:0060263	regulation of respiratory burst	Biological process	0.0466203	9	2.86245
	ko05164	Influenza A	KEGG pathway	0.0467281	47	1.49851
	GO:0009263	deoxyribonucleotide biosynthetic process	Biological process	0.0476321	7	3.44046
	GO:0071071	regulation of phospholipid biosynthetic process	Biological process	0.0487723	8	3.08951
	GO:0071933	Arp2/3 complex binding	Molecular function	0.0487723	8	3.08951
	GO:0002478	antigen processing and presentation of exogenous peptide antigen	Biological process	0.0499231	42	1.46222
